# Supplementary material for: Molecular Characterization and Expression Analysis of YABBY Genes in Chenopodium quinoa
Source: MDPI journal article supplement (doi:10.3390/genes14112103), 2023-11-19
Supplement: s1 [file s1]

Supplementary File S1

Protein sequences used in generating phylogenetic tree in Figure 2

>AtYAB1/FIL

MSMSSMSSPSSAVCSPDHFSPDHLCTVQCNCFCQILAVNVPTSLFKTVTVRCGCCTNLLSVNMRSY  
VLPASNQLQLQLGPHSYFNPQDILEELRDAPSNMNMNMNMNQHPTMNDIPSEMDLHQQHEIPKAPP  
VNRPEKRQRVPSAYNRFIKEEIQRIKAGNPDISHREAFSAAAKNWAHFPHIHFGLVDPNQPVKKTNM  
PQQEGEDNMVMKEGFYAPAAANVGVTPT

>AtYAB2

MSVDFSSERVICYVHCSFCTTILAVSVPYASLFTLVTVRCGHCTNLLSLNIGVSLHQTSAPPIHQDLQPHR  
QHTTSLVTRKDCASSRSTNNLSENIDREAPRMPPIRPPEKRQRVPSAYNRFIKEEIQRIKACNPEISHRE  
AFSTAAKNWAHFPHIHFGKLDGNNKKGKQLDQSVAGQKSNQGY

>AtYAB3

MSSMSMSSSSAPAFPPDHFSTDQLCYVHCSFCDTVLAVSVPPSSLFKTVTVRCGHCSNLLSVTVSMRA  
LLLPVSNNLGHSLPPPPPPPNLLEEMRSGGQNNMNMNMMSHHASAHHPNEHLVMATRNGRSVD  
HLQEMPRPPANRPPEKRQRVPSAYNRFIKEEIQRIKAGNPDISHREAFSAAAKNWAHFPHIHFGDMA  
DHPPTKKANVRQQEGEDGMMGREGFYGSAANVGVAHN

>AtYAB4/INO

MTKLPNMTTTLNHLFDLPGQICHVQCGFCTTILLVSVPTSLSMVTVTVRCGHCTSLLSVNLMKASFIPL  
HLLASLSHLDGTEKEVAATDGVVEEAWKVNQEKENSPTTLVSSDNEDEDVSRVYQVVKPPEKRQ  
RAPSAYNCFIKEEIRRLKAQNPSMAHKEAFSLAAKNWAHFPPAHNKRAASDQCFCEEDNNAILPCN  
VFEDHEESNNGFRERKAQRHSIWGKSPFE

>AtYAB5

MANSVMATEQLCYIPCNFCNIIAVNVPCSSLFDIVTVRCGHCTNLWSVNMAAALQSLSRPNFQATN  
YAVPEYGSSSRSHTKIPSRISTRITTEQRIVNRPPEKRQRVPSAYNQFIKEEIQRIKANNPDISHREAFSTAA  
KNWAHFPHIHFGMLLESNKQAKIA

>AtYAB6/CRC

MNLEEKPTMTASRASPQAEHLYYVRCISCNITLAVGIPLKRMLDVTVKCGHCGNLSFLTTPPLQGH  
VSLTLQMGSFGSDYKKGSSSSSSSTSSDQPPSPFPVVKPPEKKQRLPSAYNRFRDEIQRIKSANPEI  
PHREAFSAAAKNWAKYIPNSPTSITSGGHNMHGLGFGEKK

>CqYAB1 (C2C2 zinc finger underlined with black color; YABBY domain underlined with green color)

MSSTSCVDQAAVAPPSSEQLCYIPCNVCNIVLAVSVPCNNLFDIVTVRCGHCTNLWSVNMAAAAFHSL  
SASWQQHQQQNFHQAPNNGNMGEYRIDNLGSSSKCNYSKAATTMRISPPISNNSSEERVINRPPEK  
RORVPSAYNOFIKEEIQRIKANNPDISHREAFSTAAKNWAHFPHIHFGMLLETNNQPKLDEGSQKHL  
MPRTALLNN

>CqYAB2

MSSSSSTTTGSGGGCGGGGSLDNNYHHQTPNNNNNVEHVISPSDOLCYVOCNCCETVLAVSVPSS  
SLFKTVTVRCGHCTSLLSVNMRAHLLPSPSPSPPLPPSPNHLHLSPPSFFTSPHNLLEEIRSTPNILINN  
HHQPMFNDPMMSVRGVDHLHHHHQEIKPPPVNRPPEPKRORVPSAYNRFIKDEIORKAGNPDISHR  
EAFSAAAKNWAHFPPIHFGLMPDHQPVKKANVRQQQEGEHDQVMMKEGFLAPQANVNVGVGPY

>CqYAB3

MSSSCMDQAAVAPPSSEQOLCYPCNYCNIVLAVSVPCNNLFDIVTVRCGHCTNLWSVNMAAAFHSL  
ASWQQHQQQNFHQAPNNGNMGEYRIDNLGSSSKCNYTNKAATTMRISPPISNNSAEERIINRPPEKR  
ORVPSVYNOFIKEEIORKANNPDISHREAFSTAAKNWAHFPPIHFGLMLETNNQPKLDEGSQKHL  
MPTALLNN

>CqYAB4 (Predicted NLS in red color)

MATLNRLFDTQEOICYVOCSECTTILLVSVPYSSMTMVVTVRCGHCTGLLSVSMLKASFVPLHLFSALN  
QDQVNFKHQEEVDTSKAHMDRHSTLSMLPSSEEDNDDEEEDDEEDNIALEQIVNKPPEKKRRAP  
SAYNKFKEEIRRLKARNPNMTHKEAFSTAAKNWAHFPVSVQHEVDEDNDSYENSMTQNLDDDEAN

>CqYAB5

MNTNTMEDKVGSELAPPPPEHLCYVRCNFCNTVLAVVIPCKRLLDTITVKCGHCSNVSFLSTRPPLQG  
QCLDHQITLQGFNFLEKPGGFCSTIDHHSNKKSESPSSSTLTEPVSPRPVCKPPEKKHRLPSAYNRF  
MKEEIORKAANPEIPHREAFSTAAKNWARFLPHTPAGSLAESSNP

>CqYAB6

MEFSTSAERVCVVHCTFCKTILAVSVPCCSMYNMVTVRCGHCA<sup>N</sup>LLSVNIGLSPPSMPHQDNFQLLR  
QHCNYQDVSKDSSSTITGGSSSTITTMASDDHDVQQTRPPPIRPEPKRORVPSAYNKFKEEIORKASN  
PEISHREAFSAAAKNWAHFPPIHFGLNLDGQRQERLDQPVSGEGTNKSDGFY

>CqYAB7

MSSSSSTTTGSGGGCGGGGSLDNNYHHQTPN<sup>Y</sup>NNNDNVEHVISPSDOLCYVOCNCCDTVLAVSVP  
SSSLFKTVTVRCGHCTSLLSVHMRALLPAVPSPSPSPPLPPPPPLSPNHHHLSPPSFFTSPHSLLEEIRSS  
APNILINNHHHQPMFNDPMMSVRGVDHLHHHHQEIKPPPVNRPPEPKRORVPSAYNRFIKDEIORK  
AGNPDISHREAFSAAAKNWAHFPPIHFGLMPDHQPVKKANVRQQQEGEHDQVMMKEGFLAPQA  
NVNVGVGPY

>CqYAB8

MSSSNTAASSTTSLSDHFSPEOLCYLOCSRCETVLAVSVPSSLYRTVTVRCGHCTHLLPANTRSLLL  
QPPASQYHLPHHHNYSPNSHYRLGEMPNQAPNFSLTQPNGASSYMNPPSSRGGPNELPRAPTTNR  
PPEKORVPSAYNRFIKEEIORKAENPDISHREAFSAAAKNWAHFPPIHFGLMPERR

>CqYAB9

MMNTNMEDKVGSELAPPPPEHLCYVRCNFCNTVLAVVIPCKRLLDTITVKCGHCSNVSFLSTRPPL  
QGQCLDHQITLQGFNFLEKPGGFCSTIDHHSNKKSESPSMSTLTEPVSPRPVCKPPEKKHRLPSAY  
NRFMKEEIORKAANPEIPHREAFSTAAKNWARFLPHTPAGSLESSNTN

>CqYAB10 (Predicted NLS in red color)

MATLNRLFDTQEQICYVOCSFCTTILLVSPYSSMTMVVTVRCGHCTGLLSVNMLKASFVPLHLFSAL  
NQDQVNFKHQEEVDTSKAMDRHSTTSLMLPSSEEDNDDEEDEDNIAIEQIVNKPPEKKRRAPSAY  
NKFIKEEIRRLKARNPNMTHKEAFSTAAKNWAHFPVSVQHEVDEDNGSHENSMTQNLDDED

>CqYAB11

MSSSNIAASSTTTTTTTTTTSLSLDHFPSEOLCYLOCTRCETVLASVSPSSSLYKTVTVRCGHCTHLLPV  
NTRSLLLQPPPASQYHLPHHHNYSPNSHYRLGEMPNQAPNFSLTQSNGASSYMNPSSSRGGSNELPR  
APTTNRPPEKRORVPSAYNRFIKEEIORIKAENPDISHREAFSAAAKNWAHFPPIHFGLMPERR

>CqYAB12

MEFSTSAERVCYVHCTFCNTILAVSVPCSMYNMVTVRCGHCANLLSVNIGLSPPSMPYQDNFQLLR  
QHYNQDVSRDSSSTITGGSSSSTITTASDDHDVQQTRPPPIRPPEKRORVPSAYNKFIKEEIORIKASNP  
EISHREAFSAAAKNWAHFPPIHFGLNLDGQSQARLDQPVSGEGTNKSHGFY

>BvYAB1

MSSSSSSTTTTGSAGGGGSLDTTNNHSHNTNVENHLLSPSDQLCYVHCNFCDTVLAHSVPSSSLFKTVT  
VRCGHCTNLLSVQMWTPSTPPPPLPTNQLHHHLPPSFFTSPHNLEEIRSSTPNFINNHHQSVFNEP  
MMPVRGIDHHHHQELPKPPPVNRPPEKRQRVPSAYNRFIKEEIQRIKAGNPDISHREAFSAAAKNWA  
HFPPIHFGLMPDHQPVKKANVRQQQEGEHDVLMKEGFLAPQANCNVNVGVGPY

>BvYAB2

MDFSTSERVCYVHCTFCNTILAVSVPCSTYNLVTVRCGHCANLLSVNIGLSPPSVPHQDNFQLVRQH  
YNHQDESKDSSNITAGSSSSTITTGSDQHDDHQQLRPPPIRPPEKRQRVPSAYNKFIKEEIQRIKASNP  
EISHREAFSAAAKNWAHFPPIHFGLNLDGQRQARLDQAVAGEGANKSHGFY

>BvYAB3

MSSSTTTTNLSLDHFPPEQLCYLQCTRCETVLAHSVPSCSLFKTVTVRCGHCTHLQPANTRSLLVQPPP  
NQFHLAHNYSPPTSHYRLGEMANPSPTYSVTQPNATSSYMTPTLSRGGSNELPKPPTNRPPEKRQR  
VPSAYNRFIKEEIQRIKAENPDISHREAFSAAAKNEAGEDNVRMRSGFYSAQTNVGVSPY

>BvYAB4

MATLNRLFDAQEIQICYVCNFCCTTILLVSPYNSMSMVVTVRCGHCTGLLSVNMLKASFVPLHLFSAL  
NQDQLNKHQEEVDTSKIMDRHSTTSLMLPSSEEDNDDEDEDEEVEDEDIALEHTVNKPPEKKRRA  
PSAYNRFIKEEIRRLKARYPNMSHKEAFSTAACKNWAHFPVSVQHGVDEENGSHGNRHMTHNFEEEAG

>BvYAB5

MTNCVDQAVPSSEQLCYIPCNFCNIVLAVSVPCNNMFDIVTVRCGHCTNLWSVDMAAAFRSFASSW  
QHHQQQNHFHQGPNCGNTGEYKIDNLGSSSKCNYTNKATTMRISPPMNNNTSEERIINRPPEKRQRP  
SAYNQFIKEEIQRIKANNPDISHREAFSTAACKNWAHFPPIHFGLMLETNQAKLDEGSQKHLMPRTA  
LLNN

>BvYAB6

MSNNMEDKVSMEAPPPEHLCYVRCNFCNTVLAVVIPCKRLLTVTVKCGHCGNVSFLSTRPPLQG  
QCLDHQITLQGFNFMEKPGGFCSTVDHHSKKGQSSSSSSTLTPVSPRPYVVKPPEKKHRLPSAYNRF  
MKEEIQRIKTANPEIPHREAFSTAACKNE

>SoYAB1

MSSSSSSTTGSGGGSGFDTPQTPTTEHVSDQLCYVHCEFCDTVLA VSVSPSSSLFKTVTVRCGHCTNL  
LSVNMVHLLQAAAPSPPLPPPPPLPHHLSHPSFFNPPHNNLLEEIRSSTPNILMNNHHQPMFNDQ  
MMSIRGGDHLHHHHQEIPKPPPPVNRPEKRQRVPSAYNRFIKDEIQRIKAGNPDISHREAFSAAAKN  
WAHFPHIHFGMLMPDHPVKKANVRQQQEGEHDQVLMKEGGFLAPQANVNVGIGPY

>SoYAB2

MEFSTSERVCYVHCTFCNTILAVSVPCCSIYNLTVRCGHCANLLSVNIGVSPSPVPNQENSFQHYSNY  
QDVS KDSSTMTGGSSSSTITMTSDQHDDQQSRLSPIRPPEKRQRVPSAYNKFIKEEIQRIKASNPEISHR  
EAFSAAAKNWAHFPHIHFGNLNLDLGQRQARLDQAVAGIEGTNKSHGFY

>SoYAB3

MSSSTSSTITTNLSDLPPPSSEQLCYLQCSRCDTVLA VSVSPSSSLYKTVTVRCGHCTHLLPVNTRSLPPPP  
PPNQLHLSHNFFSPTSHYRLGEMPNQSPNFSLTQPGGASNYMTPTLSRGGANELPRVPTTNRPEKRQ  
RVPSAYNRFIKDEIQRIKAQNPDITHREAFSAAAKNWAHFPHIHFGMLPDQTVKRTSNMRPHHPQEA  
GEDVRMRTGYGGAQANVGVS PY

>SoYAB4

MAASLD RFFDTQE QICYVQCTFCTTILLVSVPTCSMSMVVTVRCGHCNGLLSVNMLKASFVPLHLFFS  
LNQDQEN NKHQEEVNMSRV TADRHSTTSLMLPSSEEDNDDGDDDEEEDDDDDDEDNIVLEQVVNK  
QEIRRLKSRNSNMSHKEAFSTA AKNWAHFPRVQNEVEEQNDSDHNVKMTRHFEEETR

>SoYAB5

MSSCVDQAAA AVPSSEQLCYIPC NFCNIVLA VSVPCNNLFDIVTVRCGHCTNLWSVNMAAAFQSLTSS  
WQQHHQQNFHQAPNNGNMGEYRIDNLGSSSSKCNYNHKAATTMRISPPLNNHLAEERIINRPPEKR  
QRVPSAYNQFIKEEIQRIKANNPDISHREAFSTA AKNWAHFPHIHFGMLLETNNNQAKLDEGSQKHL  
MPRTTALLNN

>SoYAB6

MMNRKMMEGKMSMELNAGPDHVCYVRCNLCNTVLA VIPCKRLETTITVKCGHCGNVSFSTRPLP  
PLTATATATATATATATPTPTLPQQGFNFLEKTCSSDANHSSSSNSTLTNDPHSPSPFVCKPPEKKHRLP  
SAYNRFMKEEIQRIKAANPEIPHREAFSTA AKNWARFLPHSPSAGTNNTN

>OsYAB1

MSVQFTSEHVCYVNCNYCNTILVVNVPNNCSYNIVTVRCGHCTMVL SMDLAPFHQARTVQDHQVQ  
NRGFQGN NFGSYDIASRNQRTSTAMYPMPTSQQQVSPIRPPEKRQRVPSAYNRFIKEEIQRIKTSNPEIS  
HREAFSAAAKNWAHL PRLHFGLSVADGGGGGGSN

>OsYAB2

MSAQIVPAPEHVCYVHCNFCNTIFAVSVPSNSMLNIVTVRCGHCTSLLSVNL RGLVQALPAEDHLQD  
NLKMHNM SFRENYSEYGSSSRYGRVPMMF SKNDTEHMLHVRPPEKRQRVPSAYNRFIKEEIRRIKAN  
NPDISHREAFSTA AKNWAHPNIHFGLSHES SKLDEAIGAPSPQKVQRLY

>OsYAB3

MSSSSSSSASSAAAAAFRPAVVQREQQVVEEKFPAAAAAMREMLPVPVAAAAADSEQEQLCYVHCH  
YCDTVLVVSVPSSSLFETVTVRCGHCSLLTVNMRGLLLPTTAAAPPPPPPPPPPPPPAAHFPHSLNL  
APANPPHHHSLLEISTANSPTQLLLEQHGLGGLMASAASCRNNNSPAAAAAPPPPTSQGKAAAKEP  
SPRTNTAVINRPPEKRQRVPSAYNRFIKDEIQRIKAGNPDISHREAFSAAAKNWAHFPHIHFGLMPDH  
QGLKKTSLLPQDHQRKDGLLKEGLYAAAAAAAAAAAAANMGVAPY

>OsYAB4

MSSSSSSSAVFLDHLAAPSPTQLCYVHCNCCDTILAVGVPCSSLFKTVTVRCGHCANLLSVNLRGLL  
LPAPAPAPANQLHFGPSLLSPTSPHGLLDEVAFTQPSLLMEQAASASLSSITGRSSSSCASNAPAMQMPP  
AKPVQQEPELPKNAPASANRPPEKRQRVPSAYNRFIKDEIQRIKAGNPDISHREAFSAAAKNWAHFPH  
IHFGLMPDQGFKKTfKPQDGSIEDILLKDSLYAAAAAAAAAAAAANMGVTPF

>OsYAB5

MMSSAPETFSLDHLSQHQQQQPPPLAEQEQLCYVHCNFCDTILAVGVPCSSLFKTVTVRCGHCANLL  
SVNLRGLLLPAAASTANQLPFGQALLSPTSPHGLLDEVPSFQAPASLMTEQASPNVSSITSSNSSCANN  
APATSMASAAANKATQREPQQPKNAPSANRTSEKRQRVPSAYNRFIKDEIQRIKASNPDITHREAFSAA  
AKNWAHFPHIHFGLMPDQGLKKTGIQSQDGAGECMLFKDGLYAAAAAAAAAATAASSMGVTPF

>OsYAB6

MSAQIAPAEQVCYVHCNFCNTILAVSVPGNSMLNIVTVRCGHCTNLLSVNLRGLMHSA PALQDHHH  
HHLQESGLSGCFRDQSGYPEFGFSAASSSSKLRLPAAAAMVSYQQNQLEQALHARPPEKRQRVPS  
AYNRFIKEEIRRIKANNPDISHREAFSTAANKNWAHYPNIHFGLSPGHEGGKKLVDDPIPTAPSSKKIQG  
FYS

>OsYAB7

MSSAARHHCSGLRERLGCVCQCFCATVLLVSVPCSSVLRVVAVQCGHCSGILSAVNLPSPVVSASIELTP  
QELDAGPPPGEYSDESSGDDREGRDAEDDAPAPAAA AVANKPPGRKQRTPSAYNCFVKEEIKRIKSME  
PNITHKQAFSTAANKNWAHLPRIQQKRGRDSC

>DL

MDLVSPSEHL CYVRCTYCN TVLAVGVPCRLMDTVTVKCGHCNNLSFLSPRPPMVQPLSPTDHP LGP  
FQG PCTDCRRNQPLPLVSPTSNEGSPRAPFVVKPPEKKHRLPSAYNRFMREEIQRIKAAKPDIPHREAFS  
MAAKNWA KC DPCRSSTVSTSN SNPEPRVVA APIPHQERANEQVVESFDIFQMERSG

Supplementary File S2

Promoter sequences

>CqYAB1

CTCTTTTAGTCTCTTATCTCCAAGAGAAATAGATAAGAGTAAGAAAAAAGAATAAATTAGATCA  
ATAGTTAGAATTCGGGTAATTAATGGAGTATAAATCACTTTTGGTAGGTACGTAAAACTTTTTATTA  
ATCCAATTTGTTAATAAAATTATAAATTATAAATTGATACGAAATATAACTGATTTTTTTAAGTAAA  
AAGGGTATCCCACTTGTTGACATGACTAAACATAAACTTTCCAATAACATAAGATCAAATCAC

AGTAAATTATAGCTCAATGTTATGCTAAAAATAGTATTCTTAGTTGTAAGATGGATTGCCTTTTACA  
ATAATGCTACGTGAAAATTAAGTAAAATTTATTTTCATTGGCTACTTATCACAACCATAATATATACG  
GAGTACTAATGTTTGTGAAGTGTCTCCATCACAATGGTAAACTAAAGTTTTATTTTAAATTTTTTA  
TTAATAATATTTTTTTTATTTATTTTTTAAACGTTTATTTAATTTTTTATTTTCTATTTTTTTGGGGGG  
TGGGAGTGTTACGGACACAAACATGAAACTAAACTCAAATGAAAAAGTCAAGCTTTATTTTT  
TCATGATCTGTTCTTTACATAAATTACAGAGTAGTGATATATGCATGTCTAATGGTTTTTTTTTGATA  
CTTTAAAATTGCTTATTCTGCTTATTCTCTAGAAAGTTTATGTTTTTTCAAAGGTGACTTGTATAA  
TTATATATTTATGATTCAAAATTTAAATGTAGAAGCATCTATTATTAACATTGAATAATTTTTT  
GTTGAGCTTGAAACACACTAACAATTAAGAAATTCAGCATATTACAAGTATATATGAATAATTTGT  
TGTTGATTAATTGGAAGCCTTAAGCAAATTTAGGGTACGGTATGATGACCTAGTTCTTCTTTTAA  
ATAATTTAACTAAGGGTCTGTTCTCATACGTTGAAATTCATTCAGTTCAGTTCAGCTCCTAATTT  
CCTTCTCTTATAAAATATTCAGTACAGTTCAGCTCAGTTCAGTTCAGTTCAGTTCAGTTCAGTCA  
ATTTAGTTCAGTTCAGTTCAGTTCAGTTCAGTTCAGTTCAGTTCAGTTCAGTTAAGTTCAG  
TTCAATTCAGTCTGAGTTCAGTTAATGAGAACAGACCCTAATTTCTTCAAAAACAAACAAAAAA  
AATTAACCTAATTTAATGCTCTCAAAGTAGGAAAATAAGTATATATACGTACAATTAGTATCTCAT  
CACTTCATTCCATAAATACACATTATTAGATTTCACTTTTTGTGAATGACTGTATTATTAATCCGTAA  
AATCATCAACACTACATGAAAAAAAATAAAAAATAAAAAATTGTACTCTAACGAGGTATTTGTG  
TTCCACCTAAAAATCGACCATAAACTTGAAGAAGCTTAAAGAGAAGAGACAATTCTTTATTGTA  
ATTGGACTTGAAGTCTACAATGATAACATTATTAGACATAAATCATTACTCATTACACTGTTTAGTC  
CCTCTAATGATTTCTTATTAAGACAAATGAGTCGATAACAATAATGATGTATGTGAAAGAAATGAT  
GATCAATTGGTCTTTTCATTATGACATACATCTGCTCTAAAAAGATTTTGGACTTTTCTCCATTCA  
TATGGAACGAACTTAATTAAGGATCCAACCTTCATGCTTTAGGTAAAGGGATACATCTATTATTCA  
TTTTTTTTGTGATTATTATTGATTAATAATGTGTGATCACATTTGTAATAAGGAGTAATGTGTTAAT  
CAACACTTGTTTTTTCACCAAATTGTCCTATATATGGTATTAGGGTGGTGGGAGATACGCCTATTAC  
ACACGGAAGCAATTGGGAAAATAAAAAATTGAAAGTCCAAGCAATTCAATTAACCTCTACCATCG  
AGTTCTTACTTGATTCTCTACGTGCACCTGCATTTGATGAGTGACGTATACGCAGTCATCATTATCA  
TATATATTCATCTTTTCTTGCTTCACGAATATGTAATTAGCGCTCACACATACAAATCCCTTACATTA  
CACAATGGTAGAATTTGATGAGAGATACATCTCATAAGTAACAACCACACCCAAGCAAATGACT  
AAGCTAGAGCTAAAGTTTATACTATACTTGTATATAACATATCATTTTCGTTAAATCCATAAAGAA  
AAGGAAGAAAAAAAAGGAGAAAACATCCACAAAAATTCATAAACCTCATGATCTCATCCACCT  
ATTGTATAGTGGCAAGGAAAGGGGTGAGAGGGACTACACACACAACCTTGTTTCATAATAATAG  
CCAGCCATACTAACCTGTCCAATTTATTAGTCTGCCAAAATCATTATATTTATGATTTACCCGT  
TTTTCTAACTCTTCAATTCACGATAATTTATTTTCTCTAAACCATCCGGTCTGAACCAGCCTAAA  
TATTCAAATCTCGAAAGAATTCCTTTCTCAACCCCAACATTTTCTGTTTGTAGCCTTCAACACC  
ACTTCTTTTTTTTTTATAACTTTGATTTTCATTTAAAAAAAATCACCCAACCTTTTTTTTTTTTTTAA  
ATAATTTTATTTTCTTCCCATCTTTATAGACATAAATAATTGAAGTTCATTTAACATTATTAGCCCTT  
CCCTTCCCTACCTAGTCTTTTCTATCAATATTTCTCTCTCTTCCCTCATCTTCCGGGCTATATTTCTC  
CTTTTATTAGAGAATTTCTGTTATAAATACAATTATATAAGGGCAGAACAAATTTTACTGTTGGAGT  
TATCACCAGCTAAGGTTTTTTTTTCTTCTTCTTACAAACCAAAAAAAAAAAGAGAATAACCTA  
GTTAGTTTGCTTCTTCACTCATATTCTTTAGCAAGCTTTTCTCCTTCGCAAGTTGGGCATTTTCTCG  
TTCGATTATTCGATATCCTTCTATTTATACCATCAGGGCTCGTTTCGTTTCGAATCGACGAAAAAAA  
GAGAGAGAG

>CqYAB2

ATCAAATAAATACCCACGACTCATTCTACGGCAATCACAACTCTCATACTTCACTCTCAATACTCT  
CATTCACTCTCATTTTATCTCTCTAAAAAAGTAAAAATAAGGAAATATTTGACTACCTCC  
ATCTCATGTTTTTTGCAACTTAGGGTTATTATTTGTGAGACATAAAATATCCAAAGTTGTAAAAA  
ATATGAAACAGAGGTAGTAGTTAAAATTATATGAAAATATCTTCCTAGTTTTTTTAAATAGGAAAC  
TCTTCCTAGGTTGAACCTATGTTAATAATTGTGTTCTTTTATACTCTACACCATAAACAACAAAATA  
AACTTATATTGATATTCCTTTTATTTGTTTTAGTCATAAATTTAATTTTCAGTCAATATGACGATTAA  
ACTATTTTGCCTCACTTCGTCCAAATTTTGTAGAAATATCAAATCATCATATTATTTTTTGCTCC  
AATGTTATTCCATTCAAGGGGGAAAAAAGCAAGCATATATAATACGGAGTATAACATTTGCTAT  
CCCTAAAGATGAACAAAAACAATAAGATTGAAGCATTATATGTAAAAACGATGATGAATAAATT  
GGGAGCTCGTTGTAATTGATTAGTGAAGGAAGACATTAGAAGGTGAGATACACATCATATAAAA  
AAGAAATTTACTCGTATAACACAAGAAAAAACTCAATTTGTTGTTGTAAAAAAGGTTGTTGTTG  
AAAAAAGGTTAAGAAGGAAAGGTTGAAAAGAACAGATGAATGAAGCAAAGTTAATAAGAA  
CATGCACACGTCCCTATCCGGTTCCTCCCCCACCTCTGCCGCCTCTGCCCTTCAATTCTCTTTCT  
CTCTCATCATCGGGAATGCCATCCATTCACTTTCATTTTCTCTCTCTTTTCAACTACAA  
CAATAACATTCTTCCTTTTTTATTTTATTTTCTCTCTCTAAATATATAATAAAACCTAAATATATGT  
AACAAATAAATACAACCTAGCTAGCCTAATTAATTACTACTGTAGTAGCTATGTTTAGAGGTCTGT  
CAATCTATTTCTGTAAATCTATGCTTTCTCCACCCAGCTCAACCCTACTTACCCTCTAAGCTTTCT  
TATAGATCCACTTGTCACTTCTCTTTTCATGCCTTCAATTTTCATTTCTTCATTACTCCCAATTTAAA  
TGGAGTACATCATATATAATATTATATGACGATTTTCAACTTTAATAATAATCTTCATTTTACAATCG  
GTTGTATCTTACATTGCATTCTCCAAACACGCAAAATCGTATATATGGAGTAAATAACTTTGGTTG  
TACTGTACATTACAAGTATAATATTCATAATCAATTAAATTAATTTGTTGGTTATAACGTTGTATTTT  
TATCGTTCTTTAGTTTAAAGACTCCGATAAAGCTGTTATGAATTACATATCTTGTTCAAATTACACTA  
TCAAGTATCAACGAATGTATGTATAGTATGAGCTGAAGTTACTCATCTATAAGAAATTATTACAAG  
TGAGTACCACACTTTTATCCTTGTTGATTTAGCACAAATATACAATTAATAAATAAATGAGTAATTC  
TTGGCGAATTTAAAATTATGTTTTAAATGCATATCATCCTTAATATTTGAAGACAATTATTCAAGTT  
TGACTTGGCCATGTATGGTCACACTTTTGGAGCATAAATTTTGGGTGAATTTCAAGAAAATATCA  
AACATTCATTTAGCTAGCATGCAAAATGCAATGACATTCTAGATTTGTGGTAGGATGAGTTTAAAG  
TACATATTTGATTCTATTCTATTCAATTGGGGATGAGCTAAATAGCACTGTATTGTGGAGTGTGGAA  
AACGTAACAAAGGGACAAAAAGTGATTTTGGTGTGTAAATTTGGGTCCCAAATTATACATGGTCC  
TATAATAAGTTGGGTTATTATTAGGTCATCATTGATCAGAGGCTCAGGATATATATTTGAGTCTCAA  
GTGTATCTAGCTTGAAGAAAATTGTATGATCGAATGGTTTCTATTTTACAATCATGAATTAAGA  
TGATTTTTAAGAATTCATCACAAGACATAGTACTATAAATAGGGTCTCACCATTTGAGTTTCGAGT  
CCCACATTCGAGTTTTCAAACTAAAATTGATGTTTTTGGGACCAAAAAAGAGTCCCCCAAAG  
TAGAATCCCTAAATTAGGAGGATGTTATTGTAGATACATGAACACTTCACATTAATTTGCATTGCC  
TATATTTTAAGGTTGATAAAGAAGTGATGCCCCTACTAAGATAAGAACCATATCCATGACTAAC  
CTATAGCAAGGGACCCTAACACATTAAAGGAGAGGGAATTTATCTTTTTTTTTTTTTTTTTTGA  
ACAGAATTTATCTAATTATTATTATATTATAAAATTAGGTTTACATAGTACCTATGTAGTAATTA  
GACTTTACCTCAACAAAAAATAAAAAATAAAATAAAGACTATTCTTATTATAGCTTGTCTTTAT  
CATTAACCTTGTTAATTAAGCATATATAGTGACAAAAGGAAAGGAACAAAAAATGTAGTCTCA  
CAGAATAAGTGTGAAAATTAATAAGAAGAAAAAAGTGTAGCAAAAAAGCAGTACGTTTT  
TATAAATAGAGCTTTCAAGAAGTGTATATATAATTGGTATCATCATAACACAATTTACACACATT  
CACACAACAAATATTAATTCTTCACCCTATTCTCTGTCTTTCTCTCAACCCTCATTTCAAATCCCTA  
AAAAGGAAGGCGGTAAAAATATTAATAAACTATATAATAGTATAATTTAATTTAATATATTA  
AAAAAAGGGGGAGAGTGGCATGGGCTACTACAAATAAAAACATGAGTCAGTAAATCAATCC

ATCCATCCATTCATATATCCCATCAAAAAGATTATATCATCTCAACAACAAAAAATACACTTTG  
AGTGAGAGTGAGAAATCTATAACACCAATA

>CqYAB3

ACCTTACAAGTTTTAAACATGCTTGCAAAGTTATTTATAAATATATGTTGTCGATTATTGGTTGCTT  
AGTAGGTAAACAACTATTTTCTTTTAATAATTAGGTTTTTAACCTATTATTTTAAACATATTCAATCA  
AATTTGCATATGATATGACATCTTTATATACATGTTGGTAGAATTTTAATTACAATTTTACGATTCTGA  
TTCTAAAAGTCCCTTCCGATTCAAAGTGGAATCTTGATTTTGGTAACTTTGAATACAATATATATAT  
TAAATCATTATGTGATGGTTTTACATAGATTCAAAGGTGGCATCTAAGTCATTCAATTTGGATTATA  
CTTGACTGATCAATTATTTAACTCACTTTAATTTATATCATATTTGACTCTTTAATCAGTATCGTATTA  
TGATTAATCAATCAAAATCAGACAAAAATAACATTTTGTGTTAGTTAAGTCAACCGCACCCAAATT  
AAAATCAAAATTTGACATGTAATTATAAGCATAAATAGAATCTAGCTTAATCAATAGTTTGAAATG  
GAATAATTAAGTACGAATTACTTTTGATAGGTACGTAAAACCTTCCATTAATCTAATTTGTTAATAA  
AATTATAGATTGATATGAAACATAACTGAATTTTCTAAGTGAAAAGGGGATCCCCACTTCTTGAC  
ATGACTAAACATAAACTTTCCAAATAACATACGATCAAATCACAGTAAATTTGAGCTCAATGTTA  
TGCTAAAAATAGTATTCTTAGTTGTAAGATGGATTGCCTTTTACAATAATGCTACGTAAAATTTATT  
TCATTGGCTACTTATCACAACCATAATATATACGGAGTACTAATGTTTGTGAACAGTCACCATCAC  
AATGGTAAAACCAAAGGTTTTTTTTTTTTTATAATTTATTTATTTAATTTTAATTATTATTATTAT  
TAATATTCTAATTTTCTAATATTTTATTATTATCTAGGAAGTTTATGTTTTTTCAAAGGTGACTTGTT  
GAAATTATATTTTTTTTATTCAAATTTAAATGTAGAACTATCTATCTAACAATGAATAATATTTTTGT  
TGAGATTAAAACACACTAACAATTAAGAAGATTTAGTTCATATATATGAATAATTTGTTGTCGATT  
AAAGCCATAAGCAAATTTTAGGATATGATCTAGTTCTTATTTTAAATAATTTAAATAATAATGCTTC  
ATAATGTAGGAAAATAACCACACGTACAATTAGTATTCCACTTCATTCATAAACAATATACTCCG  
TATTAGAATTGAATTAGGTATCACTATTTTTGAATTACTTTATTATTAATCCATAAAATCATCAACAC  
ATGAAAAAATATTGTACTTTACCGAGATGTTTGTTTTCCACCTTAAAATCGGCCACAACTTGAA  
CAAGCTTAAAGAGAAGAGACAATTCCTTGATTGTAATTAACCTTTAAGTCTACAATCATTATTAGA  
CATAAATCATTACTATTACACTGTTTAGTCCCCCTAATGATTTCTTAAAACAAACGAATCGATAA  
CAATAATGATGTGAATTGAAAGAAATGATGAATTGGCTGTTTCATTATGACACCTGCTCTAAAAA  
GATTTTGGACTTTTCTCCCATTCATATGGAACCTTAATAAAGGATCCAACCTTCATGCTTTAGGTAA  
AGGGACACATCTATTATTTATTTTGGTTATCTCGCGTTGATTTATTGGTTGCAATTTAACATTTGTAA  
TAAGTGTTAAGTGTTAATCAATACAATACATGTTTTTTTACCAAATTGTCCTATAAAGTATTAAGG  
TGACGGGAGATACGAGAATCCTATCACATACGGAAGCAATTGGGGAAAACAAAATAATCGAAA  
TTCCAAACAATCAACCTCATAATAGAGAGGAGCATACAACCTTATCATTGAGCTCTTACTTGATT  
GTCTACATGCACATGTCTATGAGTGGCGTATACGTAGTCATTATAATATACATTATCTTTTCTTGCT  
TCACGGTTATGTAATTAGCGCTCACACACATACAAATCCCTTACATTACACAATGGTAGAATTTTA  
TGAGAGATACATCTCATAAGTAACAACCATCCAAGCAAATGACTAGAGCTAAAGCTAGTTTATAC  
TACACTTGATGTAAACATATCATTTTCGTAAATCCATAAAGAAAAGGAAGGAAAAAAGGGGA  
AAAACATCCACAAAAATTCATAAACCTCATGATCTCATCCACCTATTGTATAGTGGTAAGGAAAG  
GGGTGAGAGGGACTACACATACACACAACCTTGTTTCATAATAATAGCCAGCAATACTAACCTGT  
CCAATTTTATTAGTCCTGCCAAAATCATTATATTTATTATTACCCGTTTTCTCTAACTCTTCAATT  
CACGTTATTTTTTTTCTTCTCTAAACCGTCCGGAACAGCCTAAATATCCAAATCTCGAAAGAATT  
CCCTTTCTCAACCCCAACATTTTCTTGTTTGTAGCCTTCAACACCACTTCTTTCTTTTTTTTAATAA  
CTTTAATTTTCATTAAAAAAAATCACCCAACCTTTTTTTTTTTTTTTATAATTTATTTCTTTCCA  
TCTTTATAGAAATAAATAATTGAAGTTCATTTAACATTATTAGCCCTTCCCTTCCCTAGCTAGTCTTT



TCCTATCAATATTTCTCTCTCTTCTCATCTTCCGGGCTAAATTTCTCCTTTTATTCAGAGAATTTCT  
GTTATAAATACAATAATAAGGGCAGAAGAATTTTACTGTTGAAGTTATCACAAAGCTAAGTTTTTT  
CTTCTTCTTCTTACAAACCAAAAAAAAAAAGAGAATAACCTAGTTAGCTTGCTTCTCTACTCATT  
TTTAGCGAGTTTTTCTCCTTTGCAAGTTGGGCATTTTTTCATTTCGATTATTCGATATCCTTCTATCTAT  
ACCATCAGGGTTCGTTTCGTTTCGAATCGACAGAAAAAAAAAAAAAAAAAAAAAAAAAAGAGAGAG  
AGAGAG

>CqYAB4

ACAGAACATGCAATGGATACTAAATATACAATCACCTTTTGCAAAGAGATGGAGAATGACGACC  
TACAATAGTCCACGACAACCTAACATCTAATTGAATATACGAACCTTATTATTATCTCTTCTTTTC  
GTTGTCTTTTCGCCACATTTCCAGCCAACTACAGAATTTGTTCAATTCACCAATACTCAAGATGGCGT  
TACTGATTTAGGGCTTAATTACGTGGATTTAAAAAGGCCCAAGCTCTTCAAATACCTCATAGGGA  
AAAATGATATGCAAGTATTGTTTGTTAATAACAACCTAAACAAGTTATCGACATTATATAATCATT  
GTTCAATTGCATATGCTTCAATGCTCCATAAAAAATGCTAAAAGATCTTAGTAGTTCTCCTAACCC  
AAAGACCCTACACTCCGAAGATGAGACCCTATTTCATTGATAAAAAGACCCTACTCTTAGTCAAG  
GTAACCGTACTCTCATGAAGGCCCTGTTTGGTTTGATGTAAAAGGTTTTTCATGGAAAATGAATTTT  
CCATTTTTCCCCATTTTCTTTGTTTGTGTTTGTAAAGGGGTGGAAAACAATTTTCCAAGGGTGA  
AAATTCATCCTTAATGATGGAAAACATTTTCTTCCCAAAAACAAGGGAAGCTACATTTTCTTTTC  
TCCTCCTTACCTCTTTTTTTTACTTCCCTCTCATTTCATCTTTACATTTCCACTCTTATTTTTTATTTTTCT  
TGTATGCAACCAAAACAAAGGAAAACATAATTTGCAATTGTGTTTTCTTGAAAATATGTTTTCCAT  
GAAAACCAATTTTCAATTGAAAATGTTTTACATTAAACCAACGGGGCCGAAATGAGACTCAGA  
TTTTCAAGAATATGGGGATGATTTGGTATAGCTTGTTTATGGTTGGAAAAATAGGTATTTGTTCGT  
CATAGCCGTTGCATTAGCCACTTGCTCTTGAGGATTCCGAACCTGAAAATCTCTTGATGAGAACT  
GTAGGCCAAATGTATTTCCAATAATGTGTGGTTGTTGCACCCGGTTGCACTTCCAACCAATGTTGG  
TCTATTAATAATTCACAACTAGACCAATTCTCTCCTTTTGTGTGCGATCTTTTGCCGCGTTTCCAAC  
CAACTACAGAGCTTGTTTCATTACCAATACTCAAAATGGCCTAACTGGTTTAAGGCTTATTTACGT  
GGATTTAAAAATCTCTAAGTTTTTCAAATACCTCATAAGGCCAAAATAATGAGAAAAGAACAAT  
ATGTGTCCACAAAATACTAGTCCAAAAAATTGTCTCACGTGAGATGCACGTGCAATGATAGACTT  
GTTTTTCTTAGCAAAAAGTTGTAGGTGGTTGGGAATTAAATTTGGGGTAAATTTCAAAAATAGATA  
ATAGAAAGAAACACAAAGAACAAGACATAAAACAAGGTAAAAATAGAAGGTTAAAAATCAGC  
ATGTTTTAAGTTTTCAACTCATTATAGACTATGGTCAATTATGCAGGCATAACCGTATAAGTATAA  
TATTTCTTTGTTCCATGTAAAGACAAATCCTAAGATACCTCCTTTCTATTTTGTACACATTTCTAG  
AACTTCATCCCCACTAAAAAAGGTAAAAAATCATCTCACTAAACCCTAATTTAGAAAATAATG  
ACACAAAGATATAGGAGGCAGAAAACAACACTTAACAAAATAAGACATTGGTCCCATTTTTCT  
TTAATTTCTACCATCAAACCAACAACATTTTGGAATCTCTCTTTTTTATGTGATGCCTACCAAGT  
GTGTGTCAATGTTTGGAAGTAAGTGTGTGACTTGAATTCAATGCATTTATCAGAACTCTAAGTGA  
GGTCAAAATTTCCATTTTCGAGAGTACGTGTACTTGCTTTTCAATCTAAACAAGACTTCCAAAAAT  
TTATGTGTTAGTTGAGTAAGAAATCTATGAATATAATGAAGTTCTCCAATAATTTGGTGTAATGGTT  
AGGAATGCAAGGCCGATCATTAAATGTTACCTATGATGATTATTTATAATAATTCTAGAAAAATTATA  
TATTTTGATGAGTAACAATATAATCTTACGCACGGATCTAGATTTCTTGAAATAGATCCTCCCCCTCC  
TCCTTTTTTATAAGTCATTCAAGTATACTGTTATCCCCTCTTTTTTAGAGGGTTTGTACCTAGGTTTAA  
TGTTCAAATGTTCAATGACATATATAATAACTAATTTGCTAGTATAGCTTGGTATTTTACATGTCAA  
AGACTAATCGACTAGAGTCATTTCTTCATTAATAGGATAAGTTTTTGCTTGTGAATGTGGAACAT  
TGATCAACCACTATCACTGCGAGTCTATTTTGGACATTCAGATCAGGGACATACAATCATATTTAAA

TAAGGCACATTTATGTATCAATATATGTACCAATTAATTTACGATGCTAGTGATTAAACTAGCTAG  
AGTATAAAAGGCCTCTCAAATAATCGATTGAGATTTTTGTGGTTATTTGTGGTTCAAAGAAGTGTA  
TGTGTATGTACATGTCCAAATGATGAAAGGATGACAATTCGATTATCCTAATACAAAGTATAACC  
ATCAATTAATAATCCGCTCCTCTTATTAATTACATCAACTAACCAAAAAGGAAAGTTAGATTGCCTA  
TAGATACAATCTAACAAAAATTTGATAAAAGCTACCATATACATATAAGAATTATCACTAACAAATT  
CACTGTCCCTCCCTAGCTAAATTCTAAAAACACAAATTTTGGTCATATAATAAATATTATGAAGGAT  
TCATTTATATCCTAGGAATAAATTAATTAATATGCATTATTAATTAGCTACATATATACTGTTATGTT  
ATAAGTCTTATAACACATGACTCACTTAAATGAAGTCTGTTGTTTTTCTATATATATTATGCATATA  
CTTGCTCCTACTCTTAGAACCCCTAAAAACCTACAATTGCACAATTACATCCAACCCCATTTTCTCT  
CTCTAAATTCTTGGCCTTCATCAAGAATA

>CqYAB5

TGTTTCAATTCATCTAATTGATCCGAGTTAGCTATCCAGTTCCATGTTACGGTTTTATTAAAGATTAT  
TTAGTGAAACGTTTTTTTTTTCTTTAATACTCCATATAATCATAAAAATTTAGTAAATTACTATTATTG  
AAATATTATTGGATTATTATTTCATCATCAAGTCATTGTTATCCAAGTAAATTACTATATAATTCAATT  
TGGTTGATTGTGTTGGATCAAATAATTGATGATGAAATTAGATAAAAAAAATTAAAAA  
AGAAAAGAAAAAGAACATTATAAAACCATCATATTGTAGAATGTTTCATATATTGATATATTGTGCT  
TTTGAAAATCAAATAAGAATGATAATTAATATGCTATTATTTAAAAAAATTCATTGTTTTGAC  
CTACTAAAAAGTACATTAGAGATTTAAAATGATTCTACTAAATTAACAACACTACTATGGACAACAA  
TCATTGAAATTCGAGTAACTTTTATTGTAAAATACGTTATGTACCGTTTCTTCAAAAATTTAATTAC  
ACAATTATAGCTTTAAATCCTTAACATTAATTATAAGCATTTGGAATTGACAATAGTTGGCCGGTA  
GCTCTTTTTTTTCATGAATGAATACATAAAATCACTTATCAACTATCGCTAATTTGCCAAACAT  
GCACGCCAAGTATTTATTTATTTTCCCTATATACTCCAATATAGTTCCAATGTGTTATCTCTCAAGT  
CTCAACTACATACAAGTAGAATTACCTAACAAACCTCTCATATTAATGGTAAGATTTTATACAAAC  
AAGGAAAGTTTGGGAAATCAAAGTGCAAAAGTAGGCTAAATCTCCAATTTGGTAATCTAGGAGT  
TGAATCGTCTCATTTCAAACAGCTCTTCCCAAATTCATTAGTGATGGTGAAGTACTAGTGATTTGAGCAC  
TTGTCTAAATCAATGCTTTTGTTTTTCTTAACATGGTACTACTCAGTACTACTAACAACATCAAT  
TAGATTTTCTGTCTTTTCTCACCTCTTTCTTACTTTGCCCTATTCTAATTAACACTAAAAAAGT  
GAAGTGAATTTCTAATCTAAGAAATTCAAATTTTATAGATACATAATTTAGGAAATTGATCACACT  
TTTGTTACAAAGTTGCAAAGGAGTTGCTCTTAGTTTGGACTAGTCTTTTGATGCCACCTTCACGTG  
TACGTGAACGAATTGATATTGCTACTCCATAACTTCTCAATTTTATACACATCCCCGCATCTTGG  
TCAATTTTATTTGACTATGATTTTGAAGTGGCAAAAATTTTATTTAAAGCTAGTCTGTAATGACA  
ATAGTCTTATCACATAAATCAATTAAGTTTGGCTAAAGTCTTAAACGTGTTATCCAAAACCTTGAAA  
TCATATATATCTTGTCTATATCACTGTTATTAGTAACTCTCTCCACACACACAAAAA  
AAACAACCAATAAATTCAATATGTAAAAATCATAGTACCGTTATCTATTGTGTCTACTATGTGATTT  
AGAGTAGTTTATATTATTGTAATCTTTTCATTGCCTTAATTAATAGAACATTAAACATTTCTTTGAG  
CTACAACCTACAAAAAAATTTGACTCCAGTTGTTTATGAGAATGAATTATGATTACTTTGTAAACC  
CTTGGGCAAGTATTTTGAATAGCATAAGGTGAACATAAATAATCACCACCCTACTCAAGTCAAAC  
ATATGAGATTATGAGGGCAATTTTAAATTCTAACTCATACAAATCCTAGAGGATCATTATTATTAG  
GGTTTATATATGTATTGAAGGATTGAAGCGGAGAAAGTATATAATAATTTATTTATTTTATTTGAC  
ATGTAATATGAATTTTACTTATCAACAACCATTTCTCAAAAGGGAGTCCTTTGTACATGGAAATTTT  
GAGAATTTATCACTTTCCTGTTACAAACAATGATGTTCAACTACCTACTCCAAGTAAAAGTATGT  
ACATTCAAATCATAAATAACCTTTGATAATTACTTAATTATAATGATAATGTGCCCTCCTTCTTAAA  
ACTAACATTAGGTCATGAATTCATGACCTGCTTTCACCATACCATGCAATACAACGTGCATACTAT

GTAGAAAAATGGGTAATTACAAGCCTTTAACAATAGGTGATTGTGATCTAATTAACCAACTTAGT  
CACTTAGTCGACGAGTATGTGTCTGAATGTCGTATAATCGGTTGCACCATGCACAGGCACACCATT  
ACTCATTTTTTGTCTCATGCGGAGCTATAAGAAAGATATAGGCAGGCATGCATGGTTATATAACTTG  
TATGATACAATTGGTTCAAATATAAATTCATACTGTCTTTAAGTTGGTTTGTATTCTAATTTATAAA  
CAATTCATACATGTATGTTCTTATACACACACAACCTTGTATCATTTAATTAAGCACACATGCCAATA  
CATATCTTTAACCATTTATCACTAATTTTGCATTTCGTATGTAAGAAATATATAATTATATATAAATAA  
AGTACACATTAAGACAAAATTTAACAAGATCACAATGACAATAATTTACCTTACATATAAATCAC  
AAAAGACCATTAGAATAACTTAATGCATAAATTGTGAAAAAACAACAAACGAATCATCTAAT  
AAATGATCGAGCTAGCTTATCATAATACAAAGCCTTGCATTAGTTGCATAGTTGTACGTTAAAAA  
ACTCACAATTTGCAAAAATGAGCACAAAAGAATAACCAAATTAGAAACCCTAAAAATCACTTT  
TTACGATATCCAACCCATAGACATTTAGGCAACTATATATAGCTTTCCCCCTCTACTATATGTATA  
CCTTAAACCTAAACACATTTCTTTTATCTCTACCCTATCATCTTTTAACTATTTCTTCCCTTTCA  
TTCTCAATCACCAACATTATCTATCTCTTATCCTCTCTTGTTAATTAGCTAGCTTCGATCATTCTTC  
TTCTACGATACG

>CqYAB6

AAAGAGATAGAGTTTATATATGTTACATGAAATAAATGTTTTCTCTCAGTTTATAGATACTAGTTTCT  
TTACTTTAATTACTGTATTGTACAATGTACATTATTATATAATGAAGGTTGTTTCATCATCTATTACTA  
TTATATATATTACCATAATATCAAAGTCTCTCATAATTAAGTTTTATGTAGGAATATATATTTACATA  
GTCTAATATTGTATACTTAGATTGAAATTTTATATTGATTGATACTATGTATATAGTGACATTATATAG  
CTATATAGGGAGATGTATGTCATGTGGATAATTGCTATAGGTTGATAGATTTTATACTTGAATATTAT  
AGATTTAAAGAGCTTAATTTATGATAAGTTTAGGATCAAAGGGTTAATAGCATTACTTGTCATTTTC  
ATCAATAGGTAGAGTATTTATACAAAATTATAAGATAACATAAAATAGAACACCGTCTTCCTAGA  
GCTATCCCTCACTCTCTAGTATCTCTAACAACCTTTATATAATTAATTTTAATAAGAATGATTGAACC  
ACCGCACATAGTTTATTTGTCATATGTCCTAACAGACTTTATATTTTATACTAATAAAGACTCTGC  
AACCCAATATATATGCAAATAATCAATTAATACTCCGTACAAACTTTATAATTAGTAAACAAGCAT  
TATACATGAGTGCTTCGTTAATTTATGCACATACAGAACTATACAAAGGTTATGAATGGCCTCAA  
CACACCAAACAAAATAAACATATACAAATTCATTAACCTTATGACCAACTATTTCTAGTAATAATT  
GAATAAATATCTTCATATATCAAAGTAATTTCCAACCTCTAAAATTCATGGTAATAATTGAATAAAT  
ATCTTGAACAAAAATTAAGAAAATTGCTAGATTATTACAAATTAATTTGCCATTGATAAGTAC  
ATATATATAATGGGCTAGTGGCATAGGGCCATTTTTCTTTACTTGTTGACTATGACAATTACAAT  
AAAGGTGGAGATAGTAAACCTGAAAATTTTCACTAAAACCAAATTAAGACCCAATTTATGTT  
GGCGTCACACTAGCATTAGTTGCCAATTGTCAATAAGCCCTTGATGATCATATCCTCTAGTTAAGG  
CCTAAGGGTCCATTTTATTTGGCCATCATACCAAATTAATAAGACCCCATTTTTTCAGCTAGTCTTA  
ACACGCTACCTTCACTTTACTAATTCCTTCTGTAGTTTCATACCTTTTGCTTATTATTATCCACCCC  
CACCAACTTCTATTTCTCATTGTACAAATATTCAAGGGCGAGATAGTTATTGATAAATCGCGTAAT  
CTAATACAGAGATGTCTTAGACGACACAGACTTACAATAATTTATATATTGTATTGAAACATTAAC  
GTTAGAAATTATCATAACAATATATCAGAGTGAATTCTACTTGTTAACCAAGTTTCATTTATCTAT  
TCTTATTAACCTTAACTTGTACATTGTAAATTGAACTTGATCAGGTAAGTACTAGCTTCTTATTAATAA  
CCCAGGTTTATAGCTTATATTTCTTGAACCTTGCTCTGATCTTGACTTATTAACCTACTCTATTAATTTT  
AATAAAATAAGTAAAAATAAGGTGAACAAATTAACAAATGTTCAACAAAGACTAGAGTCAT  
CAACCCTTAATATTAAGGTTACTTTATTAATTATAACATACTCCCTTTGTCCCTATTTGTTTGCCTC  
ACTTTCAAAAAAAGGGTGTCCCTTAAATATTGCCCCGTACCATATATGTTACTGGGAACCACAA  
TTTTACCCTTACAAAATCATTTTAGGTTCCACCATTTTTCTCTCTCATCAATTCCACTCAACCAAAA

ATTAAATAAGCAAAATATGAGCATGGGACAAACAATTAGGGATAGAGGGAGTACTTAATTATTTG  
TGCTAGAATGGTGGAGCTCTAATTGGTGCGGTAAGTAGGCTTCAAGTGAGCTTCACTAATTTGAG  
CAATGTAGGGGATGAAGACGATGTTACTCCGTACATTGTAATGGACCTTCAAAGTTAATTTTCATA  
TGCATCAAAGAGCTAGATGTAAACAATTTTAAAGTAAACAACTAAACTAGTTAAGTGAAAATAT  
AAGGAACTATATAATGAAAAAATGTAAACTTAAAACCTAAATATGGTATAAATTGCGGCAATAAC  
TTTTGTTTCCCATGTTAAATACAGAGATTACAGAGAGCGATGCAACATTGACTATAAGAGAGAACA  
TTTTGAAGATATAACCTATTGTAAGTTTGTAAACATAGAGTAGTAATCATCGTTAGAACATGGACAA  
TATTCACAATAGTTAAGAAAAGAGATAAAAAATGCTCCTTTTAACTACAAAACATACGTGTTTTTG  
TCAACAAATGTGATTTTATTAAATAATCAATTTTATAGTTTAAACCATCTATATTAATGTGAATAGTCTG  
GAGTAATAATATTTTAAAGTTGTGATAGCTTAATAATAGTAACCCTAATGAGATGGTATACTCTACTA  
ATTTTCTTTTGCTTCAGTATATATCCATCTTCACATTAGAACACCTAATTAATCTCGCGAAAATAAG  
ATCGCTCCTACGTCATTGTCCCCGTATGCATCCAACCTGTTGTTTTAAGAACAGGAGAGGACCCGA  
CCCGGCCCTCGAAAAACAAGGGCTTGACTAGGTTCCCTATATGGCTAAACATCAAATCCCTTATCA  
CAAACATAAGTTGATCGTACGACTCCATCCCACTTTGTAAGATCCTTTCCCAACCGACCAGAGTC  
TTATGTATGGACTATAGTCTGTTACAGCTTATTTTACTTCTTTTCTCTTTTTTTCATTACATTATCTTTC  
TCTCTCCTCCTCTTTTTTTTCCCTTTCTTTCTCTATTTTAGATTGATCAAATAAAATTGAAGTAATAG  
CACAAAATAGTGAATTTTCTTGTCTATTATATACTTGAAATTTTAAAAAAAATCAAAAAAAA  
TCAGAGATAATCG

>CqYAB7

TATTTTACAACCGGTTGTATCTTGCAGTATACGGAGTACATACATGTAAAGGATCAAATAACTAAC  
TTCGGTTTATACATTATAACTTTGGTTGTACACTATAATATAATATTCCTAGATTAGGTCACATGTC  
ATACACGGTAATTTTCACTATTTATTATTAGTTTAAACAATATATTTAATAATAAAAAATTATCTAATTG  
CATGCGAAATAAAATGAAAAATTCGTAATTACAAAAATAAAAAATGAAACTATATCATACTATAGA  
AAATCGTGGGAGTATTACATGCAGATTACGTCACAAAGTTATATGTAAGAAAATATTATTGCATAG  
TATTAAATAAAGAATAATATTTTGTGTAATGTGTATAAATGGAATATAATTACCAAATAGTAAAG  
GAAATATAATTCATAGTATTAAATATTCTCTAATAAGCTTTGGAAAAAAAATTATCTTGGCG  
GAAATTTTTTTTAAAAATAAAGAAGATAACACTAAATTTTTGTATTAAAGTCAATATGATGCATTA  
TAACGTAAAAATGTTTTTATTATTTTCACTATAAAATTAAATCCATTTGAGTGTAATTGATCAAAAA  
AAAAATCAATTTAAGCAAATAATATTAATATTAGTAATAAGAATCTTAATTGGTATTATAATATA  
GAAATTTATTGTTTTAATAAGTTGTCAGTTAAAAAGATATAAAAAGAAATATAAAGTTAGAATAA  
CATTTATTTTGGAAAAATGGTTTTAGAGGGAAAAAACGACATCAGAAAGTGACATTTGTCATTC  
CCGGTTCTGTTTTAGTATTATGTTATTGATAGGGTTCAATCAATTATACCTAAAATATTACCTTCAA  
ATCAATTAATAGTTGCTACTCCGTATAATGTAATACTCATTCCTTAGCTTAATGCTCCGTAGTTAT  
TAAGTACCTAAAAAGTTGTTAAGGATTACATAATTTATTCAAATTACTCTATCAACGAAGTTATGT  
ATAGTACTCCTTTTTTTTATTTTTTTTATTTTATTTAAAGACTAGAGTTGGAAAATTCCACTATATAT  
AGGTCATTATTGACTTAATTTTTTTTACCAATATATAATATATAAATATGATCATATAAAATGTTGTT  
GGATTTGTCATAATGTCTACTTTTATAAATTATTTTTTTCATAATTTTACTAACCTCTAATTAAG  
ATATTAATGGTCAAAATTGTGAAAACAAAGGGAGTATGAGGATACTCATCTATATATAAGAAATT  
ATTACAAGTGATATCACACTTTTATTCTTGTTGATTTAGCACAGTATAATCAAATGCATATTATGA  
TATTATCCTTAAACTTATTATGTTTTAAATAAATATTGTCCTTAATATTTGAAGACAATTCAAGTTG  
ACTTGGGCATGGCCATTCTTTTGGAGCATAAATTTTTGGGTGAAATTCAAGAAAATATCAAACAT  
TCATTTAGCTCGCATGCAATGACATTCTAGATTTGTGGTGGGATGAGTTTTAAGTACATATTTGATT  
CTATTCATTGGGGATAAGCTAAATAACACTGTATTGTGGAGTGTGGAACGTAACAAAGGGAC

AAAAAGAGATGTTGGTGTGTAAACTTGGGTCTCAATTATACATGGTCCTATAAGTTGGGTATTAT  
TAGGTCATCATTCATCAGAGGCTCAGTATATATATTTAAGTCTCAAGTGTATCTAGCTTGAAGAAA  
ATTGTATGATCGAGTGATTTCTATTTTACAATTGTGAATTAAGATGAATTTAAGAATTCACAA  
GACATATTACTATAGGGTCTCACCATTTGAGTTTAGAGTCCCAACAAACAAAATTGATGTTTTCGG  
GACCAAAAAAGAGTCCCAACAAAGTAGAATCCCTAAATTAGGAGGATGTTATTGTAGATACATG  
AACACTTCACATTTGCATTGCCTTTATTTTTAAGGTTGATAAAGAGGATGCCCCTACTAAGATAAG  
AACCATATCCATGACTAACCTATAGCAAGGGACCATAACACATAAACTATAAAAGGAGTTGGA  
ATTTATCGAATTATTATATTACAAACTTAGGTTTTATAGAGTACGTAGTAATTAAGACTATCCTTAT  
TAACTTACTCTCTCTATATGTTTCATATGTAGTACTGTAAATTTGCAACCAAATCTTTGACAGTAC  
TCTTTGAGCAAGCGATTTGCTGAAAGAGCAAACGAACTAATTAGTGTAAAGACCTTAAACACTG  
ATAAGAGCTGAGGATGTAGTATAGTAAGTTGAGCTAAGACCATTAAGTTCTCATCTCTATAAGAA  
ATACGGAGTACTTCATTCAACACAACTTATTACTTATAAACTTGTTTTTAAATAAATTCCTTTAT  
GCATGAGATGTAAATGACAATGTATATAAATTTATTTTGTTAAGCATATATAGTGACAAAAGGAA  
AAGAACAAAAAATGTACAGTCACAAAATTAGTGTGAAAAATAATAAGAAGAAAATAAAAGTGT  
AGCAAAAAAGCACTTTTTATAAATAGAGCTTTCAACTGTACAAAACTAAGTGTATATATAAT  
TGGTATCATCATAACACAATTTACACACACTCACACATTCACACAACAATTCTTCATCCTATTCTC  
TGTCTTTCTCTCAACCCTCATTTCAAATCCCTAAAAAGGAAGGCGGTAAATATCACTCACTACTA  
TATACCCCTATATAATTAATAATATTAGATAAACTATATAGTATAGTACATCAATATAAAACTATA  
TAGTATAATTTAATTTTATTACATTAAAAAAAAGGTTGGACTGGCATGGGCTACTACAAATAA  
AACATCACCGATCAGTCAGTCAGTCAGTAAATCAATCCATCCATCCATTCATATATCCCATCAAA  
AAGATTATATCATCTCACCAAGAAAAATACTCACTTCCTTACAAAACTTTGAGTGAGAAAATAA  
ACTATAACACCAAGAAAAAATA

>CqYAB8

GATGGTTTCTTCTCTACTTGCTTGATATTTTTCAAATGGTTATACAAAAAATTATACTATACAAAAT  
TTAATGAAACCTAGCTATATATAGCATATAGGACCAATTCAAGATTATGAGAAGTTCCATTGTTAC  
CACATCTGCTACCCTTGCTATTTAATTGGCTGTAGCTACTAATATCTATATCTGCCAAGTAAATAAT  
ATTTGAGCATTCTTCAACTGCTAGTTAATGGTTTTAGATGTTAGTCTTTCCTCTCGAATCTCCTTA  
ACTCCCTTTGCTTGCTGAGCTTAGCTTGATGCATATGAATCAGCAATAAAATACACTATCTTGCAA  
TTATATATGAATCCGAATGGCACCTTCATACATGCTTATAGATAAAATAGCAATCTTAGAGTGTGA  
TACGAACACTTATTTAAGAATTTAAGATGATAAAATGTGACATATATGCATATAATCATAAGACTT  
TAGAGGTACAGTTTCACGCTAGTTAACTTAATCATAGTCAGACACTTCATAACTACTTCATACGTA  
GTATTTAAGTTACATATACACTTTCAAAGAAGCATGAGCAATAAACTTTTAATTCATAATGATAG  
GGTGATTGATTTCTACATAAAGTCACACATGGTACCACAATAGGATCAACCAAAAAAAAAAAAA  
AAAAAGAAAAAAGAAGAGGCCTCTCCCTCGATATTTATCAACTTAGGTGTTAATATTTCTTGACT  
AATGTAACCTATCTACAATCGCACATACCAATGAAATGCAAAGAAAGTGGTAAGACTAATTAATTT  
AAGTAAGAAATGCTTTAATTGTTTGAAGTTTGGAGCTATAGTGTACTACAGTACTTTACAAGTCG  
TCAGGCAAAGAATAGTAATAGTGTAACCTTGCCCATATTATAGAAATTACAGCGGGTTGACCTAT  
TGAAAAAAGAGCCATACCATACATTGTTTTATCATCCCTAAGATTAATAAATTAATAAATAAAG  
GACAAAAAAGGGGGGGGGGGGAGAGGAAAATAAGAACCACATAGAATTGAAGAAGCAAA  
TTAAAGAAAGGTGGGGTGGTAGCCCCTAATTAAGAGTATGAAAGCAACAAGTGAATGATCAA  
AACAAATATGCAAATGTCACTTTCTTAGTCTTCTCCCATATCTGGCGCTTCTGCTTCATCTTCATTTT  
CTTCATCTCTCAATTCACACAAATACATGCTATTATCTACACTATACTTGGATACTTTGGGAATACC  
GCTAACCTTCACATACTTCTATGGATTGAATTTCTTACTTGTTATAATCCCTATATATGTATTCACCT

ACTCTCTATCCCATCAATCTTCTGTTGTTTAGGGATCCCATGTAATCATGTGTCTTCTCTTGCAATCT  
TCACTTTTTCTTAGTGCGTAAGTTTTGTAAATGTGTTGTTTCCTACCATTTCCTCAATTTGTTAATGGT  
GCATTCACCTTAATTGACGTCTTATGAACCTTATCTGAAGTTATTTGATATGGTTGAACTTATTGAA  
CCTAGCTGATTGGATCTTATTATTAGATCGACCTAATTGCAAGGGAGCAAACCTTATTAGGCGTAAT  
TGAACCTTACAACCTTATTAGAATTGAATGAACCCATTTGCACTTATATATTGGACTTGTTACTTATT  
TTTTAAGGTTAAGAGAATGAAGCCTTAAGATATATACACAATTTAATTTAGCAAATAATCAACATA  
AAACTATTTGGAATGTTGAAAAAGGTTATTATATACAGAGTATTCTGAATAGCATGCACTAGATAT  
GATTGGATTCCAAGATATTATGTAAGACAATGATTATGTTTAAAAATCTATATTGTTAATTAATGAG  
TTAGGACAATGTATACAGTGGCATTAAAGGATTCCTAGAAAATTTGGCATACAAAGGAAAGTAG  
AAGATCGTCATTACTCTTGACATAAATCCATAATAAGTGTCTTCTCTGACTATACACAACCTAGCA  
CATCAGTTATAGACACATCTCTAACACTAATATAAATTATGAGTAAAAGGTACAGTTAAAACAAT  
TGTTACAAATCATTAATTTGGAATCAATCGGATAGTAGTCCAAAAAGGTAGAGGTCATTTATGG  
TGAGACTGAATGAAGTATCTCACACACATAATGTTAGACAACTAAAGTAGTATACATCATATAC  
ATAACTACCATTGGAAAAATGAGTGAAGTAGTATACACCACATACATAACGTTACATTGAATGAA  
GAGTACATCACATACACAATCTCAGACAGATTGAGGTGCATCACATACATAGCTGTTAAGCAGA  
ATGAAGTGTACATCACATACGAAACATAGCTTTCGGCTGAATGAAGTGTCGTACATACACAGT  
ACAACATTAGATAGAATGAAGTGTCATCACATACACAACATTAGACAGAATGAAGCTAGTGTA  
CATCACATACACAATTTTATATAAATAATATAACATACATAATGTTAGGCATAATGAAGTGCACATT  
ACATACATACATAACGTTTAAACATAATGAATCAAAGTACATGACATGTATGCATAGTGGTAGACT  
GACATGCATTAAAGATGATATAGGTGTAGAGGCCAAATGGGTTATAAAAGGAAACATAAAGGAACA  
AATTAGAGAATAGGGATGAATGAAAATGAAGGAGAGATAACCACTAAGGACACTCTTTATCTC  
TCTCTCTCTCTCTCTCTCTCTCTCTTATAATTAAGTAGTAGATCAAGAACAGCTCTTCAATTTCCAC  
TATCTACTTCTCTCTCTTCCCACTCACCTGTTTTTCATTCTGAGCAGAAAATTAACAACACAAA  
GCTGAAAAATAAGCTAAAAAAGGCAAATTAATAGAAAGGATCCAAGGTGTTGG  
GGGTTTCATCTATCAAATCAAATCAAATCAAATCAAATCAAATCTGAGAAAATCAAAGG  
ATTGATCAAATTTCAAATCAATTTAAAAAGAAAGAGATCCAAGGAA

>CqYAB9

ACAAGGAAAGTTTGGGAAATCAAAGTGCAAAAGTAGGCTAAATCTCCAATTTGGTAATCTAGGA  
GTTGAATCGTCTCTTTTCACATAGCTCTCCCCAAATTCATTAGTGATGGTGACTAGTGATTTCAGC  
ACTTGTCCAAATCAATGCTTTTGTTTTTCTTAACATGGTACTAACACACCAATTAGATTTTCTGTC  
TTTTCTCCCCCTCTTTGCTACTTTGCCCTATTCTAATTAAGCACTAAAAAAGTGAAGTAAATTTCT  
AATCTAGAAATTCAAATTTTATAGATACATAATTTAGGACATTCATCACACTTTTGTTACAAAGTT  
GCAAAGGAGTTGCTCTTAGTTTGACTAGTCTTTTGATGCCACCTTCACATGTGAATTGATATTAC  
TACTCCGTAACCTCCTCAATATATATACACATCCCTGTGTCTTGGTCAATTTTATTTTGACAATGATT  
TTGAAGCGGTAAAGAATTTTATTTAAAGCTAATCGGTAATGACAATCTTATCACACGACTCAATTA  
AGTTTGGTTAAAGTCTTAAATGTGTTATCAAAAAATTGAGATTATATATATCCCGTCTACATCACTG  
TCATTAGTAACTCTCTCCACACAAAAAATAACAAACCAATAAATTCAATGTGAAAAATCATAGTG  
TCGTTATTTAATTTATTGTGCCTACTATGACGATTTAGGTAGAGTAGTTTATATTGTAATCTTTTCAT  
TGCCTTAATTAATAGAACATTTCTTTGAGCTACATCTACCAAAAATTTGTAAGTGTATGAGAATT  
ATGATTACTTTGTAAACCCTTGGGCAAGTATTTTAAACAGCATAAGGTGAACATGTTAATCACCC  
TACTCAAGTCAAATATACGAGGGCATTATTAATTTCTAACTCATACAAATCCTAGAGAATCATTAT  
TATTAGGGTTTATATATATTAGAACGGAGAAAGTATATAATTCGTTGTAATCTTCTTTATTTATTTTG  
ATATGCATATGAATTTTACTTATCAACAACCATTCTCAAAGGGAGTCTTTGTACTTGAAATTTTG

AAAATTTATCGCTTTCTTGGTACAAACAATGATGTTGAACCACCCTACTCCCAGTAAAAAGTATGT  
ACGTTCAAATCATAATAACTAACCTTTGATAATTACTAATGATAATGGGCGCGCCCTCCTTAAAAAC  
TAATATTAGGTCATGATCTGCTTTCGTACCATGTATTACAACATGCATATTATTTAGAAAAAAGGGT  
AATTACACGTACGCCTTTAACAATGGGTGATGTGATCTAATTAACGGACTTAGTCACTTAGTCGA  
AGAGTATGTGTGAATGTCCTATATCGGTTGCACCATACACAAGGCACACCATTACTCATTTTTTG  
CTCATGTGTAGCTCTTCAAATAAGAAAGACATAGGCATGGTTATATAACTTGCATGATACAATTGG  
TTGTATAAATTATAATTAGGGATGTTAAAGGGCAGGACGGGGCAGATGTTAGCCTTTTCATCCCCA  
CAGTGGGTCCAAAATTCATCCCCATATCCGCCCCGCGGGTATAAGTTCAAAAACCCCCGCCCC  
ACCCCCACCTAATCCCCACCCAAGACCGGCCTTCCAAATAGAACAATATTAATATTACACATTT  
TTTGGTTATAATATAAGTCTATTACGGTGTACAAAGTATTATATTTACTATTTTTACTTTATTTTTTCA  
TATAAAATAATATAAAAGTATATAATTGTATAATTAATATATAGATGCATGTGGGTATGAGGTG  
GGGACGAAGTGGGGCAGGTGAGGCCGGGTGGGTAAGAAGTAGGGCAGGGAGGGGATGTGGCG  
GGTACAACCTAAATCCAACCCCCGCCCCATCACCCATGACGTGTATGGTTTTATCCCCATCCCC  
GCGCCGCGCCACCCACCAAATTGGGACCCATAACTACATCACTTGGGCAGGATGGGGCGGGTCT  
TCTACTTGACCCGCCCCACTGACATCCCTATGTATAATATAATCCGTGTCATATGTGGCTCAAATTT  
CAATTCATGCTATCTTTAAGTTGGTTTGCATCCTAATTTATAAACACTTCATACATATATGTTCTTA  
TATATAGACAACGTACTTGTATCATTTAAGCACACATGCCAATACATATCTTTAACTATTTATCAC  
TAATTTTGCATTTGTATGTGAGAAATATTTAACAAAATCTAACATGACAATATTATTTTACCTTACA  
TAAAATCACAAGAGACCATTAGAGTAACTTATGCGATAAATTGTGTAAAAATCAAACGAATCATA  
ATAAATTATCGAGCTAGCTTATCATAATACAAAGCCTTCATTAGTTGAAAATCTAATGTAGTCTTA  
TGATTTTTGACTACCACAATTTTTTAAAATGGACGGCTAAGATTGTTTGAATTTTGATTATCTTTA  
ATGAGTAATTTAATTAATAAATTATTTTTTATAATTATTTTATATATATATATTTTAGTTCTAGAATTC  
AAAAATATTAAAAATAATTTCTCGAAGATAAAAAATATTTTAAAAATAATTAATAAATTTTAA  
ATTAAAAATTACTAATTAATAAATAAATAAATAAATAGTCTCAACCATCCATTTTAAAAAAATT  
ATGGCAGTCAAAAATCATAAGACTACATAAAAAGCATCCTGCATTAGTTGCATACTTGTACGTTA  
AAAAACACACAATTTGCAATATGAGCAAAAATACAATAACCAAATTAGAAACCCTAAAAATCA  
CTTTAATTCCACGATATCCAACACCATAAACATTTAGGCAACTATATATATATAGCTGTCCCCCTCT  
ACTATATGTATACCTTAAAACCTAAACACATTTCCCTTTTATCTCTACCCTATCTTTTAACTGTTTCT  
TCCCTTTCTCAATCACCAACATTCAGCAAGCAACTAACATAATCTATCTTATCCTCTCTTGTTAAT  
TAGCTTCTTCTTCTTCT

>CqYAB10

GAATTGGGGTTTTTGGCTTTGGAGGGTATTTTGGGATTGGAATTGGTGGAGAGAAAGATGGCGGTG  
GTTGTGCGGTGGTTGGAAGAGGGGAGAAGTGGTTGTGGTTGGGAAGTGAAGCTAAGATTGCCAT  
TGAAGATAGGATATTTTAGCGCCTTTTTTGTGGATTGGGTAGGAGGAGAGTGGTTTATAAGTTT  
TGGGTTTGTAATGTAACCTAATGTTGGGCTATTGTCCTAACTTTTGGGTCTTTTAGGCCCCCTTATTT  
CTAGATGAGAAGAATTGTCGTATTGGACGTTTTTGTATGAAGATTCGTGTTAGCCGACCGTCTTTG  
TTGTTGTCATCGTCGCTTACTGGAATCTTGAATCTCGCATTGGCAAAGTACATGTTGAAAAGT  
GGGGGGAGGATAATATAGATTTTCAAACCTCAAAGGTCTAATAGGGATTGAACTTGCATCCTGAA  
GGTAAAAGGTACGATTTTTACTACAAGTATTAGTAATTGGGTGTTATGATAATAGAAATTGGATG  
CACCTTTTATTATATGATGTTTATGGGATATTATTTAATATACTTTGTGACTTCTTTAGGTACATTATT  
TGAGTAATTTGTGTTTCGTTAATTAGGTTTGTGGCGCAACTGTTCTTGACAAAGAAAGCAAAGGAA  
CATACCATATAACCATGCGTAGTGTTTTTTGTTTGTATATATATAGAAATTCACACCTACAAACC  
AAGTTTGTAGTGCAGTCAGCAGTGTGCATTACAAATAGGTATTTATACCTCCATAACTATATTTTGC

CAAACACATTCTATGTGTATGTAGCGTATCATAATCCTTGCGTTGTTGTGCATATGAGATTTTATCC  
AATCTTAGAGATTGGTATCATCTCTCTTGTGAGATACATTTGTGGTCAGCGACAAACTTGATTGCA  
AATATTTTAAGTGCTCCATTATATATATTATACTAATATCTACATGAGAATACAAACTAGCAAAGCT  
ACAATGCTAGTAGAGGCAATTGATTGGTCTAGTGAAATGAGAGCACCTTTGAATCATGAGGTTGG  
AGGTTTAATTCCTACTAGTTAGAGAAAATTTGAGGGAAGGAGGTTCCCTTACCTTTGAATCATGA  
GGTTGGAGGTTTAATTCCTACTAGTTAGAGAAAATTTGAGGGAAGGAGGTTCCCTTACCTTTTCTC  
ACTCTCTTAAATGTCTAGTCCGTCAACTTGGATCGAGTTGACCAGTGAGGGAGAACTGGCTCGA  
CAGGAACCTTTTCTTTTATCTTATATACCCAAAAAAAAAAAAAAAAAAGTGACAAAATAATGAG  
AAAAGAACAAATGATGTGACCACAAAATACAAGTCCAAAAAATTTTCTCACGTGAGATACACG  
TGCAACAATAGACTTGGTTTTGCCTAGCAGAAATTGTAGGTAGTTGAGAATTAAATTTGGGGTAA  
ATTTCAAAAACAGATAATAGAAAGAAACACAAAGAACAAGACATAAACCAATTAAGGTAAATA  
TAGAAGGTAAAAAATCAGCATTTTTCAAGTTTTCAACTCATTCATATATTTCATAGACTATGGTC  
AATTATGCAGGTATAAGTATAACATTTCTTTGTTTCATGTAAAGACAAATCCTAAGATACCTCTTT  
CTATTTTTGTACACATTTCTAGAACTTCATCCCCTCTAAATAAGGTAAAAAATCATCTCACTAA  
ACCCTAATTTAGAAATAATGACACAAAGATATAGGGAGGCAGAAAATAACACTTAACAAAATAA  
GACATTGGTCCCCTTTTCTTTAATTTCTTACCATCAAACCAACAACATTTTGGAATCTCTCTTT  
TTTATGTGATGCCTACCAAGTGTGTCAATGTTTGAACCTTTGGAAGTAAGTGTGTGACTTGAATTC  
AATGCATTTATCAGAACTCTAAGTGAGGTCGAAATTCTCATTTCTCAATTTTGAGAGTGTACTTGC  
TTTTCAATCCAAGCAAGACTTCCAAAAATTTATGTGTTGGTTGAGTAAGAAATCTATGAATATAAT  
GAAGAAGTGCTCCAATATTTTGGTGTGATGGTTAGAAATTGCAAGGCCGACTAATAATGTTACCTAT  
GACGCTAGAAAAATCATATGTTTTGATGAGTCATAAATCATTACAAATGTCGTTATCCCATCTTTTT  
AAAGGGTTTATAGCTTCAATGAAATTTTTATGCCAATTTGGCATTTTACATATGTCAAAGAGTATTA  
GACTAGAGTCATTCTTCATTTTCTTCATTAGTAATATACATTTTTGCTCGTTGAATGTGGAATTTGA  
TCAACCATTATCACTGCAAGTCTATTTTAAACATTTAGAGAGGCACGCTGATAAATTCAAATAAA  
ATAAGGCACATGCATATATATACCAATCAATTTGCGATGCTAGTAATTAAGTAGAGTACAAGGC  
TTCTCAAATATTTGATCAAGATAGTTTTTAGTAGTATATGTGTGTTGTCCAAATGATGAAATAAG  
GTTAAGAGTTCGATTCTAATACAAAGTATAACCATTAATTAATCTGCTCCTCTTATTAATTAATTAG  
ATCAACCAAAAGGAAAATTGGATTGCCTATAGATGACAATCAAACAAAAAATTGATTAAAGTAC  
ATGATAAATTGGTGATAGCCAAATCTAACGTACCATATACATATAAGAATCATTACTTACAATTCA  
CTGTGCTCCCTAGCTAAATTCTAAAAACACAGATTTTCATCATATAATTCATAATAATGTTGGATAC  
ATTTATATCCTAGGAATAAATTAATATACATTATTATTAGCTACATAGATACTGGTATGTTAAAACA  
CATGACTCACTTAAATGAAGTCTGATTTTTTTTTCTATATATATTGTGCATACTTGCTCCTACTCTT  
AGAACCCTAAACCTACAATTACACAATTACATACTCTCACCTCCTCCAACCCCATTTACTCTCTC  
TAAATTCTTGACCTTAGCTTCATCAAGAATA

>CqYAB11

AAATTATTATAGATTTCTCAACTTGACTATCTTATAATCAGACATTTTCTTTAAAAAAAATTTGT  
TAAAAGAACATTAAACTCCAATAACTTAAAAGGTTTTTGTTCCTCATTTTGTTTTATTCCAATAAT  
TGATTATGGATCGTTCGTGATATAAAATTAATCAGGTTTTCCATGATCCAAAATAATGAATATACA  
ATCGAGTCTATTAATGAGATCGGATATTGGATCCAATACATTTATGTCTCTTGAGAGGATAAG  
GCATGTGAATGTGATCCCAAGACAAATAAGTCTTGCGAGGGAATGTGATGTATTGATTTGCTTAT  
TAATGGTTATGAATTGATTAGTAACTTTATGGATTTGGTGGTTTCTTCTCTACTTGCATGATTTTTT  
CAAATGGTTATACAAAACATTATATACTATACAAAACCTTAATGAAACCTAGCTAACATAGCATATA  
GGACCAATTTAAGATTACGAGAAGTTCCATTGTTACCACATCTGCAACTAATATCTATATCTGCCA



AGTAAATAATATTTGATTATTTCTTCAATTATTTGTTAATCGTTTAGATGTTAGTCTTTTCTCCATTAT  
ATTGTTACCACATCGAGCAACTACTGCGCATGTAAGAGGCCTCTCCCTCGATATTTATCAACTTAG  
GTGTTTCTTGACTAATATAACTATCTACAAATAATATACAATCGTACATACCAATGAAATCAAAAG  
AAAGTGGAAGGCTAATTATTTATTGTTTGTAGTTTGGAGCTATAGTGTTACTACTTTACAAGTCGT  
CAGGTAAGGTATTAAGTAATAGTGTAACCTTGCCCATATTATAGAAATTACAGCGGGTTGACCT  
ATTGAAAAAAGAGCCATATATTGTTTTATCATCCCTAAGATTAATAAATTAATAAATAAAGGACA  
AAAAATAAAAAAGGGAGAAGAAAAATAAGAACCACATAGAATTGAAGAAGCAAATAAAAGTAA  
GGTGGGGTGGTAGCCCCCTAATTAATAAGTATGAAAGCAACAAGTGAATGATGAAAACATTATGC  
AAATGTCACTTTCTAAGTCTTCTCCCATATCTGCCGCTTCTGCTTCTTCTTCTTCTTCTTCTTCTTCA  
TCTCTCAATTCACACAAATACATGCTATTCTATAATCTATGACTACTATACTTGGATACTTTGGGAA  
TACCGCTCTAACCTTCACATACTTCTATGGATCCAACCTTCTTACTTGCTTGTTACAATCCCTACATG  
TTTTACATACTCTCTATCCCATCCTTCTTCTGTTGTTTAGGGATCCCATGTAATCATGTAGTGTCTT  
CTCTTCCAATCTTCACTTTTCTTATGTTCTTGTCTAATTTCTCACCATTTCCTTAATTTGTG  
CGTTCTTTTCAATTGACGTCTTATGAACCTTCTGAAGTTATTAGATATGGTTGAAGCTTATTGAAC  
CTAGCCGATTGGATCTTGTTAGATCGACCTAATTGCACCTTATAGTTTATTAGAATTGAATGAATTG  
AACCCATTTACACATATATATTGGACTTTTTGTCTATTTTATAAGGTTAAAAGAGTGACACCTGGA  
GATATATACACAATTTAATTTGAAATGGCAACATTTTTTTTTGTGGTCAGTTATCCCTTTAGTTAGG  
CATAAGACTATTTGGAATGTTGAAAAAGGTTATCATGTATTCTGAATAGCATGCACTAGTTATGAT  
TGGATTCAAAGATATTATGCAGAACAAATGATTGTGTTAAAAAATCAATATTGTTAATTAATGAGTT  
AGGACAATTTATATAATGGCATTAAAGGATTGCTAGAAATTTTGGCATACAAAGGAAAGTAGAAG  
ATCGTATATGTCATTACTATTGTCCATAAAACCATAATAAGTGTCTTCTCTGACTATAAGCAACTAG  
CACATCAGTTATAGACACATCTCTAACACTAATATAAATGAGTAAAAGGTACTGTTAAAACAATT  
GTTACAAATCATGCATTAAATTTGGGATCAATCGGATAGTAGTCCAAAAACGTAGAGGTCATTTT  
ATAGTGAGATTGAGTAAAGTATCTCGCATACATAATGTTAGATAAACCGAAGTATACACCATATGC  
ATAACATTAGACCGAATGAATGAAGTAGTATACACCAGGGCCAAGCCATATACATAATGTTAATG  
AACACAATGGAAGAATACATCACAATATCACATACTTCGTAAGTGAATAATACGTCA  
CATACATAATGTTAGATCAATTAATAATACGTGCTCATCACATACACAATCTTTGATTGAATGAA  
GTGTACATTACATTCATAGCTTTAGACAGAATGAAGTGTACATCACATACATAGCTTTAGGCTGAA  
TGAAGTGTGTCACATACATAACATTAGATAGAATAAAACATACATATATAAGTAAAAAAAATG  
AGGTTAATTTAATTTACATGACACATATAATGTTAGATAGAATGAGGTGCACACCACATACATAA  
GGTACGTTTAAGAAATGAATCAAAGTACATGACATGTATAGTGGTAGACATGACATGCATTAAGA  
TGATATACAAGTAGAGGGAAATGGGTTATAAAAGGAAACATAAAGGAACAAATTAGAGAATAG  
GGATGAATGAAAATGAAGAAGAGATAAGCAAGTATCTACTTCTCTCTTATAATTAAGTAGTAG  
ATCAAGAACAGCCCTTGAATACCCACTATCTAGTATCTACATACTTCTCTCTTCTTCCCACTCAGAT  
CACCTGTATTTGATTCTGAGAAGAAAATTA AAAACAAACACAAAGCTGAAAAACAGTACTGGT  
AGTACTGTAATAATAAGCTGAAAAGAAAAAGGAAATTAATAAATAGAAAGGATCCAAGGTGTTG  
GGGTTTCATCTGTCAAATCAAATCAAATCTGAGAAAATCAAAGGATTGATCAAATTTCAA  
ATCAATTTAAAAAGAAAGAGATCTATCCAAGGAA

>CqYAB12

AGAAGAAAAGAGATAATTA AAAAGGCCTCGGCCCCAGCCGAAGAAGATTACCATCCCTAAACTT  
TCGGCTGAGGCCGACAGCTGCCAGCATATTCTCTTGAAAACGTAGTGCATCGGGGAGCCAA  
GTCTCCGGGATATGCTGCATTGGCCGCTGCCTCCCCGGTTCGGCAGCTTGCCGAAGATGTTCTG  
CTGATTAAGGTTCTGGGCTGCCCCGCTATCTCGGGAGGACCTAAACTTCCCATATCAGGATCCG

GCTCGGCAAGATACCGGGGAGCGCTGAAAACGTAAGGGTGGCTCGGCTCCGTGGGTGCCCTAA  
CCCAAATCCATTGACCTCTCCAGTCCTTGTCTGAAGAGTCGTTCCGGCCACATGGTTAGGAACGGG  
GGCCGAGACTCAATCCGATACCCAGAGCCATGGCATCCGTGCCCACTTTGAATGTTTGGA  
CTAGCCGATGGAGCCTTTTGAAGCAATGCAGGTTCCGGCACGTACCTGAAGAATTTGCAGACCCA  
TAAGTACGTCACTACCCTTCGGATGCTGGTGGGGGTGAGCTGGCACAGGGAAATGTTGTAATGG  
ATCAGCAAGTCTCGGACGAAAACGTCCAAAGGGAACCTCAGCCCATACTGAAGCTGTCTCGTGT  
ACACCCCCACATAACCCCGGGGGTGGACGATGGATTCTATCGGATGCTGAGGGCATTTCGGCACCA  
ATATCCATCAGCTTCAAAAATGCCGTAGTGCAACTCAATTTGCTCGGCAAATCGATATTGATCGG  
CGTTCTCTACCCACCATGAGTAGGGGCGGTTCTTTATCATGGCCGAAGCGACTTCGGCATTCTCC  
CACTCTGAAAACCCAGGGAGGATATCCCAAAGGACAGCGGGAATTCATCGTCCCGTCCAGAA  
GCACTCGGCTCATCCGTTCTTTGAGGAGGAGCCGAGGAAAGGGGAGTCGCCCTAATCCATCAG  
CAGGGTCAGACTCCGGCCTTCGACCATTCCAGGTCCCAATCCTATTCTAGGATCGGGAATCGGC  
CTTGCTCTTCTTGAGCACGGGCTTACCTCTAACTCCTCTTGCCATGGACTATTTTGAAGGAAAA  
AGTCGAAAAAGGGGAAAAGAGTGCAAAGTCGAAGAAAAATGAAATAAAATCAAAGGAATTTAC  
CTTGATCTGAAGCAAAAGTCGCCGATTTACGAATTGGTAGTGACAAGTCTCAGCTTCTAAGCTTA  
ATGCTCGGGGAATTTGCGAAGTTTTGATGCGGGCTCTTGAGCGTTCTTGAGAATTCTGGGTTTGTG  
TTGATGAATGAGTGGGGAGAGAAGACGCGCCTCTATTTATATCTCCAGAAATGGAAATTC AAGG  
AGTCTGCGTTTCAATTTCTCTCAAGCACCCCACTAAGTAACCGTTAAACACACGACCTTGCAGTT  
AAATCGCCCACTACCCGTCCAACCTCCGCAATTATCCACATTAAGTGTGTTATCTCATTAAATCAT  
GGGTTAATTACGGTTTAAATTCACATTTTTGGATTAACAAATCATTCACTTCCCTCCTTTTCTGATT  
AAATCAAACCCGACCCGTATCCTTCCAAATCGGGTCTGGGGGGCAAGTTGTTGGGTCCAATTT  
AGTCCAATTGGGCCTGGTCACTGAATGATCCAATTAAGCCCAAGGTAAAGGTCAACTCTCC  
AAATGTGCTAAAGTCAAAAATCAACATCCTCAAAGCCATGTCAAGGTCAGTCAACGGCCCAATC  
AGCTTGCCCCAGCCCACTGACTTCCGGGGCCCAATCCGCCTCCTTCATTAGCCAAGGTATAAAA  
GCCAACAATTTGGTCAATTCTTGTAAGACAATAAAGCCTCAAGCAACTAACTCTTGCACAGC  
TTTCTCTCTCTAATATACTGACTTAAGCATCGGAGGGGCTTCTCGGCGTCCCCCCCCGAGGCTAG  
TTTACGTGTATTTGTTGTGCAGGAAACCCCTCGGCTCCTGCGTCGTTCCGACCGAGACCAAGTTCC  
CTCAAGATAAAAGGATCTTCCGAGATTCGATTGTTTTATCCGAAACAACCTTTTACTTTGATTTT  
TCATGTAAGAACCATTAGAACACGGACAATAAGAGAGGAGTTTTTGAAGTTACGCAGTAATAAC  
CATTAGAACATGGACAATAGTTAAGAAAAGTGAAATAGAAATACACTCATTTTAATGGAAAAAT  
GTACATGTTTTGTCAATAAATGTGATTTTATTAATAATTAGTCTTCGATATTAATTTAAAAGGCA  
AAACCTAACGAACACCCCGGAGGCGTTAGATAAGCTAGTTAAAAGTCTAAAGATTATTAAATTA  
AAATAAACATTAATTATACCGATTGACACGTAATGTTGTCATGCTTTCCCAAATTAATACAGCTTT  
AGAACAATAATTTTAAAATATATAGTTCAAAGTAACAATAATTTAAATTTTGATAGTTTAATGAT  
GTAACCCTAATGTGTTGGTATACTTTACCATGTAATTTCTTTTGCTTAAATACCTATCTTCACATTAG  
AACACCTAATAATCAATCTGGGAAAAATACGACTAATCCTTAGTTATTGTCCCTCGTGTGCATCCA  
ACCATTGTTTTGAGAACAGGAGAGGACCCGACCCCGGCCCAAAAAACAAGGCCTTGACTAG  
GCACTAGGTTCTATATGGCTAAACATCAATTAATAATCCCTTATCACATCCATAAGCTAATTAAT  
TGTACGACTCCATCCCACTTTGTAAGATCCTTTCCCAACCGACCAGAGTCTTATGTATGGACTATA  
GTCTGTTACAGCTTATTTTACTTCTTTTTTTTCTTCTCTTTTTTTCATTACATTATCTTTCTCTCTCCTC  
CTCTTTTTTCCCTTTCTTTCTCTATCTTAGATTGATCAAATAAATTTCAAGTAATAGCACAAAATAG  
TGAATTTTCTTGTCTATTATATACTTGAAATTTTAATAACTTTTCAAAAAAAAAGTAAAAAAATC  
AGAGATAATCG

Supplementary File S3

Genomic sequences and coding region sequences of *CqYAB* genes

CDS

>*CqYAB1*

ATGTCATCAACAAGCTGTGTGGATCAAGCTGCTGTTGCTCCTCCTTCATCTGAGCAACTTTGCTA  
CATACCTTGCAATTATTGCAATATTGTTCTTGCGGTGAGTGTTCCATGCAACAACCTTGTTGATAT  
AGTAACCGTCCGTTGCGGGCACTGCACTAATCTATGGTCAGTTAACATGGCCGCGGCCTTCCAT  
TCGCTCTCCGCATCCTGGCAGCAACACCAACAACAAAACCTTTCATCAGGCACCAACAATGGC  
AATATGGGTGAATATAGGATTGACAATTTGGGTTCATCCTCCAAGTGCAACTACACTAGCAAAG  
CAGCAACAACCTATGCGAATTTGCGCTCCTATTAGCAATAATTCTTCTGAGGAAAGGGTTATTAA  
TCGCCACCTGAGAAGAGGCAACGCGTACCATCTGCCTACAACCAGTTCATAAAGAAGAAAT  
TCAGAGGATCAAGGCTAATAATCCTGATATTAGTCATAGGGAAGCATTCACTACTGCTGCCAAA  
AATGGGCACATTTCCCTCACATTCATTTGGGCTGATGCTGGAGACCAACAATCAACCTAAGC  
TAGATGAGGGCTCGCAAAGCATCTCATGCCAAGGACTGCTTTACTAAACAATTGA

>*CqYAB2*

ATGTCATCCTCTTCTCGTCAACTACGACAGGAAGTGGTGGTGGTGGTTGCGGCGGAGGTGGTAGCT  
TAGATAATAACTACCATCATCAAACACCTAATAACAACAATAATGTAGAACATGTTATTTGCGCGTC  
GGATCAACTTTGTTATGTTCAATGCAATTGCTGTGAGACTGTTCTTGCTGTGAGTGTGCCGAGTAGCA  
GCTTGTTTAAAGACGGTGACGGTGAGATGTGGACACTGTACTAGCTTGTGTGCTGTCATATGAGGGCT  
CATCTTTTGCTTCGCTTCACCTCCGTCTCCGCTTCCGCTTCGCCTAATCACCTTCATCTTTCTC  
CTCCCTCTTTCTTACCTCTCCTCACAATCTTCTGGAGGAGATTCCGAGCTCAACACCAAATATACTT  
ATCAACAATCATCATCAGCCTATGTTCAATGACCCGATGATGTCCGTTGAGGTGTTGATCATCTTCA  
TCACCACCATCAAGAGATCCCTAAACCCCTCCTGTCAATCGCCCTCCAGAGAAGAGACAGAGGGTA  
CCATCTGCCTATAACAGATTTATCAAGGACGAAATTCAACGAATCAAAGCCGGAATCCTGATATTA  
GCCACAGGGAGGCCTTCAGTGCAGCTGCCAAGAATTGGGCCCCTTCCCACACATTCATTTGCGCCT  
TATGCCTGACCATCAACCCGTGAAGAAGGCTAACGTGCGCCAGCAGCAGGAAGGAGAGCACGATCA  
AGTTATGATGAAAGAAGGGTTCTTAGCTCCTCAAGCCAATGTGAATGTGGGTGTAGGTCCGTACTAA

>*CqYAB3*

ATGTCATCAAGCTGTATGGATCAAGCTGCTGTTGCTCCTCCATCATCTGAGCAACTTTGCTACAT  
ACCTTGCAACTATTGCAATATTGTTCTTGCGGTGAGTGTTCCATGCAACAACCTTGTTGATATAG  
TAACCGTCCGTTGCGGGCACTGCACTAATCTATGGTCAGTTAACATGGCCGCCGCTTCCATTCCG  
CTCTCCGCATCCTGGCAGCAACACCAGCAACAAAACCTTTCATCAAGCACCAACAATGGCAAT  
ATGGGTGAATATAGGATTGACAATTTGGGTTCATCCTCCAAGTGCAACTACACTAACAAGCAG  
CTACAACCTATGCGAATTTGCGCTCCTATTAGCAATAATTCTGCTGAGGAAAGGATTATTAATCGC  
CCACCTGAGAAGAGGCAACGCGTACCATCTGTCTACAACCAATTCATAAAGAAGAAATTCAG  
AGGATCAAGGCTAATAATCCTGATATTAGTCATAGGGAAGCATTCACTACTGCTGCCAAAAAT  
GGGCACATTTTCTCACATTCATTTGGGCTGATGCTGGAGACCAACAATCAACCTAAGCTAGA  
TGAGGGCTCGCAAAGCATCTCATGCCAAGGACTGCTTTACTAAACAATTGA

>*CqYAB4*

ATGGCAACACTTAATCGTTTATTTGATACTCAAGAACAAATTTGCTACGTCCAATGCAGTTTTTTG  
TACCACCATCTTACTGGTGAGTGTGCCATATAGTAGTATGACAATGGTGGTGACAGTGAGATGT  
GGTCATTGCACTGGTCTTCTCTCAGTCAGCATGTTGAAAGCCTCCTTTGTTCCCCTCCATCTTTTTT  
CTGCCCTTAACCAAGATCAGGTGAATTTTAAGCATCAAGAGGAAGTGGATACATCAAAGGCGC  
ATATGGACAGGCATAGTACTACTTTGTCCATGTTACCCTCTTCAGAAGAAGATAATGACGATGA  
GGAGGAGGATGAAGAAGAGGATGAAGATAACATTGCGCTTGAACAAATTGTTAATAAACCTCC  
AGAGAAGAAAAGAAGGGCACCTTCAGCTTATAACAAATTCATCAAAGAAGAAATCAGGAGGT  
TGAAGGCTAGGAATCCTAACATGACTCATAAGGAAGCCTTTAGCACTGCTGCTAAAAATTGGG  
CTCATTTCCCGTCGGTCCAACATGAAGTTGATGAAGATAATGATAGCTATGAGAACAGCATGAC  
ACAAAACCTTAGACGACGAAGATGAAGCAAATTGA

>CqYAB5

ATGAACACCAACACGATGGAAGACAAAGTGGGCTCGGAGTTGGCTCCACCACCTCCGGAACAT  
CTTTGCTATGTTTCGGTGCAACTTTTGCAACACTGTCCTCGCGGTTGTGATTCCATGCAAGAGGTTG  
TTGGACACGATAACAGTGAAATGTGGGCATTGTAGTAATGTATCTTTTCTGAGCACTAGGCCTCCT  
CTCCAAGGGCAATGTCTTGACCACCAAATCACCTTCAGGGGTTCAATTTCTTGGAGAAACCAG  
GGGGTTTTTGCAGCACCATTGATCATCACAGCAACAAGAAAAGTGAACCATCTCCTTCGTCGTC  
ATCCACCTTAACCGAGCCTGTTTCTCCAAGGCCATTTGTTTGTAACCTCCTGAGAAGAAGCATA  
GGCTTCCATCCGCTTATAATAGATTCATGAAGGAGGAGATTCAGCGCATCAAAGCAGCAAATCCT  
GAGATACCTCATAGAGAGGCTTTTAGCACAGCCGCAAAGAACTGGGCAAGGTTTCTTCCGCACA  
CTCCAGCTGGGTCACTTGCGGAGAGCAGCAACCCCAATTAA

>CqYAB6

ATGGAGTTCAGTACATCAGCAGAGCGAGTCTGCTATGTCCACTGCACCTTCTGCAAGACCATT  
TAGCGGTAAGTGACCATGCTGCAGCATGTATAACATGGTAACAGTCAGATGTGGGCATTGTGC  
CAATCTTCTCTCTGTTAACATTGGACTTTCACCTCCATCTATGCCTCATCAAGATAATTTCCAGTT  
GCTGAGGCAGCACTGTAATTATCAAGATGTGAGCAAGGATAGTAGTAGTACTATAACAGGTGG  
CTCATCTTCTTCAACTATTACAACAATGGCTTCTGATGATCATGATGTTCAACAGACTCGTCCCC  
CACCCATTCTGTCCTCCAGAAAAGAGGCAACGCGTTCCTTCGGCTTATAATAAATTTATCAAGGA  
GGAAATCCAAAGGATAAAAAGCCAGCAATCCTGAAATTAGCCATAGAGAGGCCTTTAGTGCAGC  
AGCTAAGAATTGGGCACATTTTCTCATATTCATTTGGCCTAAATCTGGATGGGCAAAGGCAA  
GAAAGGTTGGACCAACCAGTTTCTGGAGAAGGAACAAACAAGTCTGATGGATTTTACTGA

>CqYAB7

ATGTCGTCCTCTTCCTCGTCAACTACGACAGGAAGTGGTGGTGGTTGCGGCGGAGGTGGTAGTTT  
AGATAATAACTACCATCATCAAACCTCCTAATTATAATAACAATGATAATGTAGAACATGTTATTTT  
GCCGTCGGACCAACTTTGTTATGTTTCAGTGCAATTGCTGTGATACTGTTCTTGCTGTGAGTGTGCC  
GAGTAGCAGCTTGTTTAAAGACGGTGACGGTGAGATGTGGACACTGTACTAGCTTGTTGTCTGTCC  
ATATGAGGGCTCATCTTTTGCCTGCCGTGCCTTCGCCTTCGCCTCCATCTCCGCTTCCTCCGCCTCC  
GCCTCTTTTCGCCGAATCACCATCATCTTTCTCCTCCCTCTTTCTTTACCTCTCCTCACAGTCTTCTG  
GAGGAGATTTCGGAGCTCAGCACCAAATATACTTATCAACAATCATCATCATCAGCCTATGTTCAA  
TGACCCAATGATGTCCGTTTCGAGGAGTTGATCATCTTCATCACCACCATCAAGAGATCCCTAAAC  
CCCCACCCGTCAATCGCCCTCCAGAGAAGAGACAGAGGTACCATCTGCCTACAACAGATTTAT  
CAAGGACGAAATTCAACGAATCAAAGCCGAAATCCTGATATTAGCCACAGGGAGGCCTTCAG

TGCAGCTGCCAAGAATTGGGCCCACCTTCCCACACATTCATTTCCGGCCTTATGCCTGACCATCAAC  
CCGTGAAGAAGGCTAACGTGCGCCAGCAGCAGGAAGGAGAGCACGATCAAGTTATGATGAAA  
GAAGGGTTCTTAGCTCCTCAAGCCAATGTGAATGTGGGTGTAGGTCCGTACTAA

>*CqYAB8*

ATGTCAAGCTCTAACACTGCTGCCTCTTCAACAACAACAAGCTTGTCAATTGGACCACTTCTCACC  
TTCTGAGCAACTCTGTTATCTCCAATGCAGTCGCTGTGAAACCGTCCTAGCGGTAAGTGTGCCAT  
CAAGCAGCTTGTACAGGACGGTGACGGTCCGCTGTGGGCACTGCACCCATCTCCTGCCGGCGAA  
CACACGATCTTTACTACTTCAGCCACCGCCGGCTAGTCAGTATCACTTGCCTCATCATCATAACTA  
CTACTCTCCCAACTCCCATTCGTCTGGGGGAGATGCCAAATCAAGCACCAAATTTCTCACTAA  
CACAACCAAATGGTGCATCTAGCTACATGAATCCATCATCAAGCAGAGGCGGTCCAAACGAGCT  
TCCGAGGGCTCCTACCACTAACAGACCTCCGGAAAAAAGACAGAGAGTGCCTTCAGCTTACAA  
CCGATTCATCAAAGAGGAAATCCAGCGTATTAAGGCTGAAAATCCTGATATTTCTCATAGAGAGG  
CTTTCAGTGCTGCTGCCAAGAATTGGGCCCACCTTCCCCACATCCAATTTGGGTGATGCCGGAA  
CGACGGTGA

>*CqYAB9*

ATGATGAACACCAACATGATGGAAGACAAAGTGGGCTCGGAGTTGGCTCCACCACCTCCGGAA  
CATCTTTGCTATGTTTCGGTGCAACTTTTGCAACACTGTCCTCGCGGTTGTGATTCCGTGCAAGAG  
GTTGTTGGACACGATAACAGTGAAATGTGGGCATTGTAGTAATGTATCTTTTCTGAGCACCAGG  
CCTCCTCTCCAAGGGCAATGTCTTGACCACCAAATTACCCTTCAGGGGTTCAATTTCTTGAGAA  
ACCAGGGGGTTTTTGACGACCATTCATCATCAGCAACAAGAAAAGCGAACCATCTCCTTC  
GATGTCATCCACCTTAACCGAGCCTGTTTCTCCAAGGCCATTTGTTTGTAACCTCCTGAGAAGA  
AGCATAGGCTTCATCCGCTTATAATAGATTCATGAAGGAGGAGATTCAGCGCATCAAAGCAG  
CAAATCCTGAGATACCTCATAGAGAGGCTTTTAGCACAGCCGCAAAGAACTGGGCAAGGTTTC  
TTCCGCACACCCCAGCTGGGTCACTTTCGGAGAGCAGCAACACCAATTAA

>*CqYAB10*

ATGGCAACACTTAACCGTTTATTTGATACTCAAGAACAATATGTTACGTTCAATGCAGTTTTTG  
TACCACCATCTTACTGGTGAGTGTGCCATATAGTAGCATGACAATGGTGGTGACAGTGAGGTGT  
GGTCATTGCACTGGTCTTCTCTCAGTCAACATGTTGAAAGCTTCCTTTGTTCCCCTCCATCTTTTTT  
CTGCCCTTAACCAAGATCAGGTAAATTTTAAGCACCAAGAGGAAGTAGATACATCAAAGGCTA  
TGGACAGGCACAGTACTACTTTGTCCATGTTACCCTCTTCGGAAGAAGATAATGACGATGAGGA  
AGAGGATGATGAAGATAACATTGCAATTGAGCAAATTGTTAATAAACCTCCAGAAAAGAAAA  
GAAGGGCACCATCAGCTTACAACAAATTCATCAAAGAAGAAATCAGGAGGTTGAAGGCTAGG  
AATCCTAATATGACTCATAAGGAAGCCTTAGCACTGCTGCTAAAACTGGGCTCATTTCCCGT  
CGGTCCAACATGAAGTTGATGAAGATAATGGTAGCCATGAGAACAGCATGACACAAAACCTTAG  
ACGACGAAGATTAA

>*CqYAB11*

ATGTCAAGCTCTAATATTGCCGCTCTTCAACAACAACAACAACAACAACAACAACAACAAGC  
TTGTCAATTGGACCACTTCCATCCTTCTGAACAACCTCTGTTATCTCCAATGCACTCGCTGTGAGACC  
GTCCTTGCGGTAAGTGTGCCATCAAGCAGCTTGTACAAGACGGTGACGGTTCGATGTGGGCACT  
GCACGCATCTCCTGCCGGTGAACACACGATCTCTACTACTTCAGCCGCCGCCGGCTAGTCAGTAT  
CACTTGCCTCATCATCATAACTACTACTCTCCAAACTCCCATTCGTCTGGGGGAGATGCCAAAT

CAAGCACCAAATTTCTCACTAACACAATCAAATGGTGCATCTAGCTACATGAATCCATCATCAAG  
CCGAGGCGGTTCAAACGAGCTTCCAAGGGCTCCTACCACTAACAGACCACCGGAAAAAAGACA  
AAGAGTGCCTTCAGCTTACAACCGATTATCAAAGAGGAAATCCAGCGTATTAAGGCTGAAAAT  
CCTGATATTTCTCATAGAGAGGCTTTTCAGTGCTGCTGCCAAGAATTGGGCCCCTTTCCCCACATC  
CATTTTGGGTTGATGCCGGAACGACGGTGA

>*CqYAB12*

ATGGAGTTCAGTACATCAGCAGAGCGAGTCTGCTATGTCCACTGCACCTTCTGCAACACCATT  
TAGCGGTAAGCGTACCATGCTGCAGCATGTATAATATGGTAACAGTCAGATGTGGGCATTGTGC  
CAATCTTCTCTCTGTTAACATTGGACTTTCACCTCCATCTATGCCTTATCAAGATAATTTCCAGTT  
GCTGAGGCAGCACTATAATTATCAAGATGTGAGCAGAGATAGTAGTAGTACTATAACAGGCGG  
CTCATCGTCTTCAACTATTACTACAATCGCTTCTGATGATCATGATGTTCAACAGACTCGTCCCC  
CACCCATTTCGTCCCCCGGAAAAGAGGCAACCGGTGCCTTCGGCTTATAATAAATTTATCAAGGA  
GGAAATCCAAAGGATAAAAAGCCAGCAATCCTGAAATTAGCCATAGAGAGGCCTTCAGTGCAG  
CAGCTAAGAATTGGGCACATTTTCTCATATTTACTTTGGCCTAAATCTGGACGGGCAAAGCCA  
AGCAAGGTTGGACCAACCAGTTTCTGGAGAAGGGACAAACAAGTCTCATGGATTTTACTGA

Genomic sequences

>*CqYAB1*

ATGTCATCAACAAGCTGTGTGGATCAAGCTGCTGTTGCTCCTCCTTCATCTGAGCAACTTTGCTAC  
ATACCTTGCAATTATTGCAATATTGTTCTTGCGGTTGTTATTACTATAATCTCTTCATTTTCTACC  
TATATTTTCACTCATTAATTTTCTTTATCTATTTATTACTTTTTTTTAAAAAAAATTTATTAGATTG  
GGTTTTAGGAAAATTTCTAATCTTTAAATATATTTTAAATTGTTGTACGGTATAAATATAGTCAAG  
TCTCAATCGTTTATGAGACCATTTTGGTTCTCCCTTCTTTTGATTTCTTCTTTTACAGTCAAAGA  
AAAGTCACTCTTTATTTCAGAGCTCTTTTCTTCTACCCTAATCACCATAAATATTTGCAAATTACAA  
ACATATTTCTTTTCGATTTTCAAATGTGCCCTAAAAAACCGGTTTAACTTTTCAGGGATAGATAGGA  
TAAGACTGTATACATCGCAATAACTGTAAACTCGATTTTAAATTATCGTGTTGTCATTAGTGATTTT  
TAAAGAGTTCAATTTATTTTTCATAGTAATGAATTGTATCTAGTTGAGTTTATTATTTTATTTTATTT  
TTTAATTTTTTTTAAATGTTGATGGATCATGTGTGTACATTAAACAGGTGAGTGTTCCATGCAACAAC  
TTGTTTCGATATAGTAACCGTCCGTTGCGGGCACTGCACTAATCTATGGTCAGTTAACATGGCCGCG  
GCCTTCCATTTCGCTCTCCGCATCCTGGCAGCAACACCAACAACAAAATTTTCATCAGGTATTACA  
TATACTCACTCTGTCTCTAAAAGTTCATCGGTCTCTTTTAAATTTTTTTCATCATATAACCATTGTCT  
AAACATAATTTTGTTATTAATCTACTTATACACCTAGGGTTTTCAAATTAACGTTGAGTAACACATT  
TCTCAAACCTGTCTTAATTTTATTTTATTATTATTATTATAAAATTTCTATGTGTATATTTTGG  
GGAAGTGGGTGGATTATTAGATAATTTTATTAATAAATTATAATAGATAAATAATTTAATTTGGGAA  
AGTCTAGGTCTCTTGGGATTTGTATTTATAGGTAAGACCTTTTTGTTGATTTGATTGGTAAAATTTG  
TTAGATCCTGCAGGTGTTTTTTCTTCAATTGTAGGCTTAGCACACTCTACACATATATAGGTCTAT  
TTTTATTAATTAATAGTACTCCTTATTTACCTAAGCTAGTCTAGCTCTATGTCTTATAAAAAGTCTAG  
TATGCTACAATTAGATTACAAAAAATACTGTAACAATAATAAACATAAATGTTAATTTATAGG  
AGATCTCTCTATAATTTTCTTCTTGATCTATTGTAATAATTTTCTTCTTTGAGTTACCTTGTTTAATT  
TGTGTCTCTTCTCGTCTCAAACGCCAAGATAACACATCATATATTCTGCAACGATGATGACTAGTA  
TGCTCGATAATTACTTGAGCGGGTTAAGCCCTATTTGTTTTTTATAAAGAAATTGTTGCGGATAAT  
GTTTTTATCATATTGATTTGATTATACAAAGAGCGTTTACACTTGTCGATTCTTAACTCTCTACTA  
CGCTGACATGGATTATCAATTAACATCTTATTAACATATACTAGTCATATGTTAAGCATATGTTAA

ACATTGATGATTAGTCTATTATGTTATTAATGTTTTTTTTTAAAAATTAATCATAACATTTATCTTTC  
ATTAAACTTCATTCATTTATGTTTTAGGCACCAAACAATGGCAATATGGGTGAATATAGGATTGAC  
AATTTGGGTTCATCCTCCAAGTGCAACTACACTAGCAAAGCAGCAACAACATATGCGAATTTTCGC  
CTCCTATTAGCAATAATTCTTCTGAGGAAAGGGTTATTAATCGCCGTAAGATTAATTTTCTTCCATT  
TAATTCAACATTAATACAACATTAAGTTTTTACAATCTTATGTTTGATGATTCAAATCATTAATTAAT  
TTGATTGCAACGTTTTTGTTCATGTATTTAGCACCTGAGAAGAGGCAACGCGTACCATCTGCCTAC  
AACCAGTTCATAAAGTAATTAATCGTACACTTAAGATCAAAGCTAATATATCAATATATGTATATC  
ATAAATACAGTACAATGCATTTAATTTAGTACTAGTACTCTTAAATTAATGAATTTGTTATTTGTGA  
AATTTATGCAGAGAAGAAATTCAGAGGATCAAGGCTAATAATCCTGATATTAGTCATAGGGAAGC  
ATTCAGTACTGCTGCCAAAAATGTGAGTCCACCCAACATTGTCAACTTATGTGCACCATTTTTCA  
GTGTCGGTCCAACTTTGAACATTAATATCTCGATCTCATAACATATCCAATAATAAAAATAAAATG  
ATATTTTTAATTATAGGTTAAATTTTCGATCAAGAATGTATATATAAAGTGTGAGAAATATACTTTGA  
ATAATTATAACTTAATTTTATTTTGTAAATTGTAGTGGGCACATTTCCCTCACATTCATTTTGGGCTG  
ATGCTGGAGACCAACAATCAACCTAAGCTAGATGAGGTAATTTTTCACAGCTATTTACTTATTTAG  
TCCTGCATTTTTTCATTAAATTAAGAACATTATACACGTATAATTTTAAGCAACACCATAATCATATA  
CGGAGTAGTATTTTAATTTAATTGAAACAATCTTAATAATATAATTCACGCATATAGTACAACATA  
GAATCCCTAATATTCTCTAATATGGAGTATAATTTATCTTAGAGAATGTAAAATGCAATATTGGTAA  
AGGAAGAATGGGAGATGAATTTGAACATAAAAAAATAAAAAATAAAATTAGACAATGGATAAAG  
AAACTTAAATTATGTAATAGAAAAATGTTCTAGGAGCATGTCATACATTTATTGTCAAAAAATGTT  
TAGTTAAGCTGAAAAATAACAACAAAAACATGGATCATTTATTGTCAATTGTTTAGTAAAGATGC  
ATGATTATTTTTCTTTTAATTTGCTCTTCATTTAATACTTGTATCACTCTTCTTTTGTGAATGTTTGT  
GGCATTATATAATTAATTTGATTAAAGTTTCTTATAATTCAGTGAAATCGTTCAATTCATAAACTCT  
TGTGGTTGATCGCGATTTTAGGGCTCGCAAAGCATCTCATGCCAAGGACTGCTTTACTAAACAA  
TTGA

>CqYAB2

ATGTCATCCTCTTCCTCGTCAACTACGACAGGAAGTGGTGGTGGTGGTTGCGGCGGAGGTGGTA  
GCTTAGATAATAACTACCATCATCAAAACACCTAATAACAACAATAATGTAGAACATGTTATTTTCGC  
CGTCGGATCAACTTTGTTATGTTCAATGCAATTGCTGTGAGACTGTTCTTGCTGTAAGTATAATTGT  
TATCATTATTTAATTAGTTGTTATTAATAATTTTATCTATTAAATGATGTGTTGATTGTAGGTGAGTGT  
GCCGAGTAGCAGCTTGTTAAGACGGTGACGGTGAGATGTGGACACTGTACTAGCTTGTTGTCTG  
TCAATATGAGGGCTCATCTTTTGCCTTCGCCTTCACCTCCGTCTCCGCTTCCTCCGCCTTCGCCTAA  
TCACCTTCATCTTTCTCCTCCCTCTTTCTTTACCTCTCCTCACAATCTTCTGGTATGTTTTTTTTTTT  
TATTATTATTAATATTAGGGTTCTTCTTTGGTTATTAAGAGACTAAAAAATTAAACATAATATTTTCT  
ACTTTCTTCGTTGGTACAACTAATTTAATAGTTAAGCTATGCCTTCATTTCCCTATGAAATTGATGG  
AGCGAGCTAATAATGTGACAACTAAATCTGGATAAAGGTAGGCACACTCTAATTCGTTAGTCCTT  
TTTTGTGTGGGTGGTGATGGATTGTGAGGAAACTTGGGGTTGTTATGATATGATTAATTGGTAAC  
AAAAAATGCGAATTTTAACCTACAATCAACTAGAAGTTGTCAGTGTAGATACTCTTGAGATTAAAG  
ACACATTAGTAGACAGTACTTGCTATTAAAATGAACAAATTTTTTATAACTAATGTTGAAAAATGG  
ACTTAGTAAAATTTTATTTGAGTTTGTAGGGCTTAAAAAAGTTGACATTTGTGTGTTCCATGTGTA  
TGTATTAATAGGAGGAGATTCGGAGCTCAACACCAAATATACTTATCAACAATCATCATCAGCCT  
ATGTTCAATGACCCGATGATGTCGGTTCGAGGTGTTGATCATCTTCATCACCACCATCAAGAGAT  
CCCTAAACCCCTCCTGTCAATCGCCGTAAGTCGTCCATGCTCGAATTGACCATTATATATAAAA  
TCCTTTCTACTCTAACCTTATAATTTCTTCCAATTTTTGTATTTACATAACAACGAACAATAATAATAT

CAAGTCCATAATCCCAATGAAGTATTTGTATTTTCTAGTAACACTTAAAAAAGACAACATTTTATT  
CCGCAGTTGTGCTTTTAGCCCTAAATTTGATTGATCACCCCAACAGTTTTTGGTACATCACTTTACT  
TACAAAATTTGAGAAAAGAAGTGTAACAAAATAAAGTGTTGTTTCTTTTCTCTTCATTCATC  
ATTCATCACTTTCAACTAACTGTTGTAAGTCTTTTTCATTTAGACTTTGTATCATAACACGTTT  
TTCTCTGCACTCAAATTCTCCTCTATATTACATGTACTCGTTAACTTATGTACTTTTAAATACTCGTG  
TAAATAATCAGAATTAACACGAAATAACTTATACTCGTAGTATATTGTTATGTACTAATCATCTTT  
TACTAGCCTTCTCAATATTGTGGAGGAAATATTAACCTCAAAGGCATAGTATTCCAAAAGACCTAT  
TTAGTAATACCATTGTCTAAATTTTTTTTTTTTTTAGTTAGTTACTCCTTAATTAATAAGATTAGTGTTA  
AGGTGTAATTAAGTTTCAACCTAAATTATAATATTCCTCGGAGTAATATAAAATTCTAGCCAAATT  
GAGCTACTTGCCCATCACTTAGAAGGAAAAGAAAAAAAATATTATACTGTTTGATTAGTTAATT  
AGTAAAATTTCTCACATAATAAAGAGAAATAGGCCTGTAATTAAGGGACGGGGAGTGTATTACTT  
TATAATGATGATAGACCAGTGAAATTTTGATTGATTAGGAGTAACTGAGCGAGCCAAAAGAC  
AAAAGGGCAATTATAAAGTCATCATTATTTTATAGTTAGGTTAGCCAAGTGATGTCCCCACAA  
CCCCTTGAGCAGGGACATATAAAATCCAAGATAGAAGAAGCGGTTGATGATGGGATAGATTTGA  
TAGATACAATGTTAACAGAATGGTATGATGAGGTTATGATTTTGAATTGATAGAGAAAGGGATTG  
GAATGAATGAATTAATGCAATTTAATTTTATAAAAAATGAAAATAAAATAAATTTAAGTTGTCAG  
AAGAAAAAAGGTGAGTTAATTAATGTGGTTTGTGTTGCTTGTGTTTATATGTGTATATTTTTTT  
TGCATGTTTATACAATGAACAGCTCCAGAGAAGAGACAGAGGGTACCATCTGCCTATAACAGAT  
TTATCAAGTTAGTACCCTTTTTCTACCTTCTTATTTATTTTATTAATTTAATTATGTTAGTACTTTAT  
GTCCAATTCGCAAATTGTAGATGAAAATAATTAATTGATATTGTGTCCGTCCAAAATGTATAGCC  
AGGTTACTATTTTATTTAAGCTAAGTTATATAAAAAAAAATGTATTAACATGATTCATCCGGAT  
AAAAGAATAATTAACGCTGATTACTAATGAAAAGACATGTAATGGTTTATAGGGACGAAATTCA  
ACGAATCAAAGCCGGAAATCCTGATATTAGCCACAGGGAGGCCTTCAGTGCAGCTGCCAAGAAT  
GTAATGAAATCTTTGAAGTTTCTATGCCTGTTGGTTTAAAGTTTATTATATAAATGACTAATTTTAG  
AATTTGGGTATTATTCAAAAATTGCTCAAAGATTATTGATTTTCTATTTGTTTTGCATGTAAAAAAG  
TGGGCCCACCTCCACACATTCATTTCGGCCTTATGCCTGACCATCAACCCGTGAAGAAGGCTAA  
CGTGCGCCAGCAGCAGGTACTACTCCCTCTATGTAGCCCTAACCTAGCAAATTGTACTATGGAG  
TTTTATTTTTTTCTTCAAATAAATAACTTGTAATAAAAAGAAAAAATAATTTCCATTTGCATAAAC  
ATTAACAAATGTTTCATCTTCTAAGATATTAGTATGATATCTATCAATAATTTGTTAAACATATAACTC  
GTCAATGTTAATTACTACTCAAGTGTATGTGCTATAAACTCTTCTGTCTGAAATTATTTAGTCATAT  
TCATGTTATATATCGTGAATTTGATTGGAATGCAGGAAGGAGACGATCAAGTTATGATGAAA  
GAAGGGTCTTAGCTCCTCAAGCCAATGTGAATGTGGGTGTAGGTCCGTACTAA

>CqYAB3

ATGTCATCAAGCTGTATGGATCAAGCTGCTGTTGCTCCTCCATCATCTGAGCAACTTTGCTACATA  
CCTTGCAACTATTGCAATATTGTTCTTGCGGTTGTATTTATTATTACTATAATCTCTTCATTTCTTAG  
CTATATTTTCACTCATTAAATTTCTTTTATCTAGTCCTTTTTTTAAAAAAAATAAATATTATATT  
GAATTAGATTTGGGTTTTTGAAGATTGTAAATTTAATTTTATTTTAAACTGTTGTACGGTATAA  
ATATAGTCAAGTCTCAATCGTTTTATGAGACCATTTTGGTCTCCCTTCTTTGATTCTTCTTCTTT  
TGCAGTCAAAGAAAAGTCACTCTTAATTTAGAGGTCTTTTCTTCTACCTAATCACCAAAATATTT  
ACAAATTATAAATATTTTCTTTCGATTTTCAAATGTGCCCTAAAAAACCCGGTTTAAACATTCAAG  
GATAAGACTGTATACATCTCGACAACTGTAACTCGATTGTAATTATCATATTGTCATTAGTGTTTT  
TCAAGGGAGTTTAATTTTATTTTTTCAAAAAAAAAGTAATGAATTGATTTAGTTGAATTG  
TTAATTTATTTAGTTTTTTGTTTTTTGATGTTGATGATGATGGATCATGTGTTACATTAAACAGGTG



AGTGTTCATGCAACAACCTTGTTTCGATATAGTAACCGTCCGTTGCGGGCACTGCACTAATCTATG  
GTCAGTTAACATGGCCGCCGCTTCCATTCGCTCTCCGCATCCTGGCAGCAACACCAGCAACAA  
AACTTTCATCAAGTATTACATACTCTGTCTCTGTCTCTAAAAGTTGATCGGTCTCGTTTTAATTTTT  
TTAATCACATAACCATTTCTAAACATAATTTTGTTATTAATCTACTTATATACCTAGAGTTTTCAAATT  
AATAGTGTACTCAGTAATAATAACACATTTCTCAAGCTTGTCTTAATTTTTTTTTTTTTTTTTTAAA  
TATAAAATTATTCTACTGTATATGTATATTTTGGGAAGTGGGTGGATTATTAGATAATTTTATTAATA  
ATAAAAAAAGATAAATAATTTGATTTGGGAAGTCTAGGTCTCTTGGGATTTGTTTTTATAGGTATG  
ACCTTTTTGTTGATTTGATTGGTAAAATTTGTTAGATCCTGCAGGTGTTTTTTTTTTTTTTTTTCCTCA  
ATTGTAGGCTATAGCACACTCTACATATATATAGGTCTATTTATTTTAATTAATACTCCTTATTTACCT  
AAGCTAGTCTAGCTCTATGTCTTATAAACAGTATGCTAAAATCAAATAACAAAAAAGTTAAAAA  
TTAATTACATAAACCTTAATTTATAGGGGTGTTTAAGGCTTTAAGCTTTGCTTAGTTACCCATTTCT  
CTTTAACTTTCTTGATCTTTCCTAATCATTTTTCTTCTTTTAGCTACCTTGTTTGATTTGTGTCTCTCC  
TCGTCTTAACTTCGATGATGACTAGTATGCTCGATAATTACTTGAGCTGGTTGAGCCCTATTTTGT  
TTTTTGTTTTTTTTTTTTTATAAAGAAATTGTTGCGAACAAATGTTTTTTATGATTATACAAAGAGTG  
TTTACACTTGTGATTCCCTAAACTCTACTACGCCGACATCGATTATCAATTAACATCTTATGTTAAA  
CATATACTAGTCAAATAGTTAAGCATATATTAACATTGATGATTAGTCTATTATGTTGTTAATGTTT  
TTTAAATTTATCATAACATTTAATTAATTTCTTTCATTAAACTTCATTCACATATGTTTATAGGCACCA  
AACAAATGGCAATATGGGTGAATATAGGATTGACAATTTGGGTTTCATCCTCCAAGTGCAACTACAC  
TAACAAAGCAGCTACAACATATGCGAATTTGCCTCCTATTAGCAATAATTCTGCTGAGGAAAGGA  
TTATTAATCGCCGTAAGATTAATTTCTTCTATTTAATTC AACATTAATACAACCTATTAGTTTCTTTTC  
TAGGTATCTAATTAGTTTTACAATCTTATGTTTGATGATTCAAATCATTAACCTTTGATTACAACGTTT  
TTGTTTCATGTATTTAGCACCTGAGAAGAGGCAACGCGTACCATCTGTCTACAACCAATTCATAAA  
GTAATTAATCGTACACTTAAGATCGAGTTAATATATCAATATATGTACTTGTATATGATAAATACAA  
TGCATTTAATTCAGTAATTAATGAATTTGTTATTTGTGAAATTTATGCAGAGAAGAAATTCAGAGG  
ATCAAGGCTAATAATCCTGATATTAGTCATAGGGAAGCATTCACTACTGCTGCCAAAAATGTGAG  
TCCACCAACATTGTCAATTTATCTGCACCATTATTCAGTGTCCGCCCAACTTTGAACATTAATATCT  
CTTGTAACATATACAATAATTAATAAAAACGATACTTTTATAGGTCAAAGTTCGATCAAGAAAGTA  
TATATGACAGTGTGAGAAATAAATATACTTTGAATAATTATAACTTAATTTGCTTAATTATTTTTTTT  
TTGTTAATAACAGTGGGCACATTTTCCTCACATTCATTTTGGGCTGATGCTGGAGACCAACAATCA  
ACCTAAGCTAGATGAGGTAAATTTTCACAGCTATTTACTTATTTAGTCCTGCATTTTTCGTTAAATT  
TAATTTACTAAGAACATTATACACGTACTAATTTTAACCAACACCATAATCATATACGGAGTAGTA  
TTATAATTTTAATTGAAACAACCTTAATAATATATTTTAAGCATAGTGCAACATAGAACCCTTAATT  
TTTACTTAAACGGAGTATAATTTATCTTAGACAATGTAAAATGCAATATTGGTAAAGGAAGAATG  
GGAGATGAATTTGAACATACAAAAATAAAAATTAGATAATGTATAAAGCAACTTAAATTATGTAA  
TAGAAAAATGTTCTAGGAGCATGTCATTCATTTATTGTCAAAAAATGTTTAGTTAAGCTGAAAAATT  
AACAAACAAAAACATGGATCATATATTGTCAATTGTTTAGTTAAGTTGCATGATAATTTTGCTTTTA  
ATTTGATCTTCATTTAATACGTGTATAACTCTTCTTTTGTTGAATGATGGCGGCATTTATAATTAGTT  
TGATTAAAGTTTCTTATTATTAGTGAAATCCTTCAATTCATAAAAAGTCTTGTTGGTTGATCGCGATT  
TTAGGGCTCGCAAAAGCATCTCATGCCAAGGACTGCTTTACTAAACAATTGA

>CqYAB4

ATGGCAACACTTAATCGTTTATTTGATACTCAAGAACAAATTTGCTACGTCCAATGCAGTTTTTGT  
ACCACCATCTTACTGGTAATCTTATGTTTTAATAATGTTACTATGTACCAATCTTTTTGTATACATGC  
GTGATTAATTACTCCCTCTATCTATCCTGAATAAAGATATTGTGACGTCTGTTGATAGAATAATTTG

AACTACCAATGTAACAATGTACTCAACCTGATTATCAGGTCCGGATTAGTTTGTATATCTGTGTTTT  
AATTATTATTTTTTCTTTTTATCGTTTTGTGAAGGTGAGTGTGCCATATAGTAGTATGACAATGGT  
GGTGACAGTGAGATGTGGTCATTGCACTGGTCTTCTCAGTCAGCATGTTGAAAGCCTCCTTTG  
TTCCCCTCCATCTTTTTCTGCCCTTAACCAAGATCAGGTAATACTAATTAAGTTTACATGATTAAT  
TCTTCCCATATAGTTATCTTAATAACCACATTTTTAATGTTTTTACCTTTTTATTTACCATTCTTATATA  
ATTTAATCTACTTTTATTTCCTTTTGTGCATAAATAACAATGGAAATTTGTCCTTCCTAAAAGGAATC  
ATAAAATGTACATCATTTAATAATTATTAGCAATATATATTATGAAATACAATACTACTGAATTAAC  
CTGATATCTTGGATATTTTGTATTAAAGGAACCTCAACTATATTTGTACACAATAAAATTATGAATA  
ATTGTAATCTAAAGTTTATTTTGGACAATTTAACCTAGCTTAGTGAACTTAACTATTAATTTAGAAA  
TGCTCTTGTTTTATTTATATATAGAAAAAGTTTATACATATCATGATTTAATTTTACATAGGTGAATT  
TTAAGCATCAAGAGGAAGTGGATACATCAAAGGCGCATATGGACAGGCATAGTACTACTTTGTC  
CATGTTACCCTCTTCAGAAGAAGATAATGACGATGAGGAGGAGGATGAAGAAGAGGATGAAGA  
TAACATTGCGCTTGAACAAATTGTTAATAAACGTATACACTTCAAATTTGATGTTTCATGTATATGTT  
ATTGAATTTTTTCGCTTTAGTATCATGACCTAACATGTTTCATAATATACAAATATTGTTGTTGTTTTA  
ATTAAATGGCAGCTCCAGAGAAGAAAAGAAGGGCACCTTCAGCTTATAACAAATTCATCAAGTA  
CGTACGTAAATTTGACATTATTATTATCCATAATTTTTTCATTCAAGCGTGTAGTAATTAATAATATA  
CAATGTATAGAAAAATAAATAAATAAATAAATATATAATAAAACCTGTTTCGGTTGAAAACAATG  
GGACCTTGCCGAAGGTCCACTAAATGGAGAAGACTGGATTTCGATCCAAGCTGTGTTGGGCCGA  
AGGTTTCCTGCACAGTGAACACACGTAAACTAGCCTCGGGGGTGTTTCCGAGGAAGGCCCTCC  
GATGCTAAAGTCAGTACAATGTGTAAAAGGAAGACACTATGCAAGAGAGTTTGTAGCTTGAGG  
CTTTTGTGGAGTATTTCTCAATGCAAGAATGAGCATATGAGTTGGAATAATCCGTGTATGAGATAA  
TGTATGTGATGATGCATGTGTTGTTGTGTCTCGTATGTGATGTTATGAGATGTCTTATGTAAGAATA  
TGACTCTCTCCTTGAATGTGTTAATATGAGGGCTTTTATACCTCATCATATTTGGAGAGGTTGGGCT  
TTAGCCCAATTGGCTTACTTTGTGGGCTGACTTTTGACTTTTGAGCAATTGGAGAGTTGAACCTTG  
ACCTTGGGCTTTTAATTGGATCATTTAGTGCTCAGGCCCAATTTTGACTAAATTGGACCCAAACA  
ACTTGCCCCCAGACCCGATTTCGGAAGAATGACGGGTGCGGTTTGATTAACTCAGAAAAGGAG  
GGAAGTAAATGATTTAATTGATCCAAAAATTTGAATTTAAACCGTAATTAATGAGATAACAACGG  
TTAATGATTTGCGGAAGTTGGACGGATAATGGGCGGTTTAATCACAAGACATGTGTTTAATGGTT  
ACTTAGTGGGTACTTAAGAGAAATTAAGCACAGACTCTTCGTATCCCGTACCTGGAGATATAAA  
CAGAGGCGCGTCATTCTCCTCACTGATTCACCAACACAAACCCAGAATTCTTCGAGAGAGAATC  
CAAGAATCCGTATCAAAACTTCGCAAATTCCTCCGAGCATTGAGCTTAGAAGCTGAGACTTGCC  
ACTACGAACTCGTAAATCGGCAACTTTGCTTCAGATTAGGTAAATTCCTTTGATTTAGTTTATTT  
TTCTTCGAATTCGAACCTCCTTCCCCTCTTCTTTGACTTTTCTCTTCGAAATAGTCCATGGCAAGA  
GGAGTTAGAGGTAGAGCCCGTGCTCCAAGAAGAGCAAGGCCGATTCCCGATCCTAGGAATAGG  
ATTGGGACCTGGAATGGTCGAAGGCCGGAGTCTGACCCTGCTGATGGGATTAGGGCGACTCCCC  
TTTCTCGGCTCCTCCTCAAAGAACGGATGAGCCGAGTGCTTCTGGACGGGACGATGAAATTCC  
CGCTGTCTTTGGGATATCCTCCCTGGGTTTTAGAGTGGGAGAATGCCGAAGTCGCTTCGGCCA  
TGATAAAGAACC GCCCTACTCATGGTGGGTAGAGAACGCCGATCAATATCGATTTGCCGAGCA  
AATTGAGTTGCACTACGGCATTTTTGAAGCTGATGGATATTGGTGCCGAATGCCCTCAGCATCCG  
ATAGAATCCATCGTCCACCCCGGGGTATGTGGGGGTGTACACGAGACAGCTTCAGTATGGGCT  
GAGGTTCCCTTTGGACGTTTTCTGTCGAGACTTGCTGATCCATTACAACATTTCCCTATGTCAGCT  
AACCCCAACAGTATCCGAAGGGTGATGACATACTTATGGGTCTGCAAGTTCTTCAGATACGTGC  
CGAACCTGCACTGCTTCAGAAAGCTCCATCGGCTAGTGCCAAATATTCAGAGTGGGCACGGAAG  
CCATGGTTCTGGGTGGTATCGGATTGAGTCCCGGCCCAATACTTGACCATGTGGCCAAATGACT

CTTCAGACAAGGACTGGAGAGGTCAATGGATTTGGGTTAGGGCACCCATAGATCCGGGGCCACCC  
TTGTGTCTTCAGCGCTCCCCGGTACTTAGCTGAGCCTGATCCCGAAATGGGAAGTCTAGGTCCCC  
CCGCAGATAACGGGGCGGATCCGAACCTGGATCAGCAAAATATCTTCGGCAAGCTGCCGAACC  
CGGGGGGGAGTGGTGAATGCAGCATATCCCGGAGACTTGGCTCCCCGATACGCATTACGTTTTTC  
CAAGAGAATATGCTAGCAGCTGTTGGCCTCAGCCGAAAGTTTAAGGATGGTAAGCTTCTTCGGCT  
GGGGCCGAGGCTTTTAACTACCTCTTTTTCTTCTCTCGCTTTGCTTTTTTATGCTGTGCCAACATAT  
CTGAGCTAAACTTTTTCCCTTTCTTTTTTCAGAGCGGGACGAGACCAACGTTGGTATTAACCTACG  
CTCGTCTTGGTGTAAACCGAGAGCGAGTTGTAACCTGAACGGGCCCCGTCTATCACTGAGCCGAG  
GCATAGGGAAGTTCATCTGGACTCTTCCCACTTCCAAATTGAGGCTGTTGCTCTGTATCAGAGGC  
AGAAGCCTTGGTGAAGAAGAGAGACCCCTGGTTTCAGCTGCTGAACGAGGAAGCTGAAGCTG  
CCCGCACAGCCGAAGAGGTTGCACGAGTACTTGAGGCTTGTGAAGGAGGAGAAGGGTCTCCA  
GAGCTGCTGAAGCCGAAGCTGCAGCTAGAGCAGCTGAAGAAGACGAGGCTTTGCTGAAAACCT  
CGGTGAGCTTTCAGACAACTTTTTCTTTCTTTCTTTTTTTTTTTTTTTTTTTTTTTTTTTTTTT  
TTTTTTACTCACACTCTTCTTCCCCCTGTCTGTTACAGTCTGAAGAGAGTAACAGACACAGAGA  
AGGCAAAGCTCCTGTTTCGTCCCGAAGATCAAATACAAGAGTCTTCAGACTCAGATATGGACGAG  
CAGCCCCTTCTGAAAAGGCGCCGAAGGATGGCCATCATCGGCCCTCATGACTTTCAGCAGAGGC  
CGATGACCATCGGCGTCGCAATAAGGGAACCTGAGGAAGGCAATGGATCGCCGAGGGTTCCCC  
AGCCAACACCCCAATCTCCTCAAAAGACCCCTCCGCCACCTCCTGAGATGGAGGTGGATCAGA  
GAACTCCCGAACCTAAGGGAGGGGTCCAAGAAGAAATCAAGGAGAGTGCTGCTGAGCACGAA  
AATAAAGATGCCGTGATGTCAAGTGCTGAAGGCTTCACGACAGATATCGCAAGAGAGGTTGAG  
GCTTTCGTCTCACCCCTGAAGAAGAGGAGTTCATAGTACTTGACTCCTCTGAGAAGGACGATG  
CTGAGACAACCAAAGCTAATCAAGCTCCATCGTCGTCTTCCCTTCTTTCCAGACTCTGCATTCT  
GGAGAAATGGGTTTCTCGGCCCCCGAATTCCAATCCCAGATCACATCTGGGACTTCATATGGGG  
TCAAAACCGAGAAGGAGCTGCAGCCTACTTCGGCAATTTTGCTGGCATGTCCGAAGTAGACAGG  
GCAAGGATCTGGTCGCTGAAGGCCACTGCTGGGATGGGCGAATCCAGTAGATCAGTTCCTGACC  
CAGCCAGGTCTAACCAACTGCTGATGATGCAGGTAATTTTCCTTCATTTCCCTCCGAAATTCAGTCT  
TATTTTTTTTTCTTATTACTTATTTTTTTTTGTCTTCTCTGTTTTCAGTTCGTGCACAATCAGACTCTCAC  
TGTAGAGCTGATTGATACCCTACAAGATAGGGTAGACGCTGCTGTGCACGAAAGGAAGGTGGCT  
GAAGAGGAAGTTAAGCTTGCTAAGCTGAAGCAAGCAGCAGCTGAAGAGAAGCAGCAGGAGGT  
TGAGGAGTACGGTAAAAAAGCTGCCGAAGCTCTGAAAACCTTCTGCGATGCTATGGAGATGGA  
GGTTTTTCCCCCACTGATGGAAGGGGAAAAATTCCTCCAGGAGCATATGGGAGTGGACGTCTCC  
AAATTCAAGGCTGCTATTGAGAGCCGAATTCAAGAAGGAACTGCTGCACAAGCTGAAGTGCAG  
CAGCGTCTAGAGGCTCTTGAAGCCAGCCGAATGGCTGCTGAAGAGTTGCTCTTGGCCAAAGACG  
TCCAACTCTCAGAGGCTGCTGCTGCTGCTGAAGCTCAAAGAGCTAAATTCCAAGAGGCTGAGG  
ATCAACTGCTGATCCAGAAAGTTGAAGTGGCCCAAGCTCAGACAAAGGCTTTCCAAATTCAGCA  
AGAGCTGAATGAGCTGAAGGGTCTCCTCCAAAGTCGCTGAACAGCTGAAGAAATCCAAGGA  
AGACTTGGAGGAGACCCAGAAGAAGCTGGCTGATGCTGAGGCTTTACTCAAAGTCCGTGTTTAC  
ACCCAAGAGGAATATGAGATGGGTTTCAGAAACGGATTCCGAGTATGCCGAAGACTCTGCCTTC  
ATGCTGAGCCGAAGCTGGACTGGTCTAAATGTGCTGAGTGGGTCCAGAATCCCGAAGACCCTCA  
CATGAAGTATGCAACTCCAGCTGAAGCTGAAATTCTTAAGGCTGAGGAAGCCGAAGAGGAAGC  
TGAAAGACTGGAGTTGGAAGCTGAGCAGAGGGAAAGGGAGGCTCGGCAAAGTGCAAAGCCCCG  
CCTCTTCTGCTGCTGGGGCTGAGGCCACCATGGGACTCAACGCTGATCAGTCTGATCCTCCGGCT  
GAAGCATAGGAACTCGGGCAGTCGTCTTCAGAATCTTGCGGTTTCATCATGTGCTTAACTTTAGAC  
TTGCCGCTTCTGAGTTTTTTGCCTTGTTTTTGTCTCAGCTTGCCTTGTCGTACAGCAGTTTTATT

TTTTGCTTATGTACGTATTTTCGGCAGCTGTTATTTTCCGCTTGTGGGCGGCTGCCGATACTGAATTA  
TTGAACTTGTAGCTCAAAAATTTTTCTTCAGTTGCTTTATTTTTGAATGCTTTACTGTTTCTTTTCT  
TCAACTCTGCCGAACATAGCTGCACTGCGTGCTTCTTGCCCCACAGAAATTGAAGTATGACTTT  
AGTTGAATAAGCAATTTCTGAACTTCTTCAAAATAGATATCCGAAACACAGGGCCAACTTAAGG  
CAATGCTTCTGGGATACAAGTCTTACTGAAGATTGACTGTCTGAAAGTTGGATATCCGAAACACA  
GGGCCAACTGAAGGCAATGCTTCTGGGATACAAGTCTTACTGAAGATTGTCTGAAAGTTGGATAT  
CCGAAACACAGGGCCAACTGAAGGCAATGCTTGGGATATTAGCTTTCTGGGACTAACCTCTTTA  
GAACAAGTCTTACTGAAATTTGACTTCAGCTGAAAGACCAGCGTTCTTAAAGAAGACGTATATC  
CGAAACACAGGGCCAACTTAAGGCAATGTTTCGGATAATGGCTCTCTGGGATACAAGGCTCAGT  
TAAGGCAATATCCCAGGATTGTCCATGGACTCATGTCTTTGGAGAACAGGTCTTACTGATGTTTG  
ATTTAGCTGAAAGACCAGTGTTCTTTAAAAAGACTGAGTTTTGTAAGCCATCTGAAACCCAGTT  
ACCCGAAGGCGAAGGTTTCAGACGAGGCTGATTTAAAAAGGCTGTTATCCTTGATTTTCTGTCTA  
TCTTTGAAAAATGGATACCCGAAACACAGGGCCAACTTAAGGCAATGTTTCGGATAATGGCTCT  
CTGGGATACAAGGCTCAGTTAAGGCAATATCCCAGAATTGTCCATGGACTCATGTCTTTGGAGAA  
CAAGTCTTACTGAAGTTTGACTTCAGCTGAAAGACCAGTGTTCTTTAAAAAGACTGAGTTTTGTA  
AGCCATCTGAAACCCAGTTACCCGAAGGCGAAGGTTTCAGACGAGGCTGATTTAAAAATTTTCA  
ACTGTTGCTGTTATCCTTGATTTTCTGGCTATCTTTGAAAAATGGATACCCGAAACACAGGGCCA  
ACTTAAGGCAATGTTTCGGATAATGGCTCTCTGGGATACAAGGCTCAGTTAAGGCAATATCCCAG  
AATTGTCCATGGACTCATGTCTTTGGAGAACAAAGTCTTACTGAAGTTTGACTTCAGCTGAAAGAC  
CAGTGTTCTTTAAAAAGACAGGTTTTGTTCAGCAATCTGAAACCCAGTTACCCGAAGGCGAAGGC  
TTCAGACGAGGCTGAATAAAAAACCCTCAAAGAGTAGATAGAACAAGAAAATTTTGAAAGGA  
TAAACAGTTGTAAATTTTATATAAATGGCGGCTCCAAGGCCTGTCATTAGTTCAAATGTACTTAC  
AAAGATTGTTCTGCCCCGAAGGGTTTACACATGGTATTTTTTTCAGTACATCAGCATTCCAGTGATT  
CTTCAACTCAGTTCCATCCAAGTCCGGAAGTCGGTATGTCCCTGGCTGAAGCTCATCATAAATTT  
CATAAGGTCCCTCCCATGTAGCTGAGAGCTTCCCATGGATTCCGGCCTTTCTGAACTGCAGCAGCA  
TTCCGAAGGACAAGATCCCCAATTTTGAGAGGCCTTGTCATGGACCCTTCAGTTATGGGAGATGA  
GGTCTGAACTTATCCCGGGCATATCAGCTGCCGAGAAAGTAAACACATCTCTGTTATCCCGCAGG  
AGCTGAATAAGTTTACAACGGGTGTTAGGATCAAGGTCCATCCCGATTGTTACACATTTCTCAGC  
ATCTCCTTCGGCTAACTCAACTGTTTCAGTCTGTTGGTCCATGTCCATTGCCGATGGACTGGACTC  
TTCAGAATCTGGTCTGCTGCCAATGTCAGCAGGTGTCCCAGTCTTTGTGTTCTTCGGCTGGCTCTC  
TGAGTCTTTTCGGCTCAGATGAAGAGTCAACCTTTTCCCTTTTCGGGACCTTTTTCCCTGGGCACTG  
ATCCTTGGGCCGAAGCACTTAGGCCTTTTCGGCTTTTTTGTGCTTGGCTCTCTTTCTTTTCTTTCTCC  
TCCTCATCTTGTCTCATCTGGGCGACTACTGGATGGCTTGAGGTAGTTGCACCTTCGGGCGTCC  
TTTTGGTTGCCCTGTATCCTTTTCGGGGAAGCCGGCGTCTGAGACGTAAATCATCAGCTGATGATA  
AGTTGAGACGACCCCTTGATCTCGTGAATTATGGGTCTCCCCAAAATCACGTTGTACACTGAAG  
GAGCGTCGATGACCAAAAACTCAATCATGACGTTCCGGGCTGCCTCATCGCAACCGATGGTGAC  
AGGAAGTGTACCTTCCCATCTGGATAAGTTGAAGCCCCATTGAACCCGGATACCGGATAGGGT  
ACCGGCGTAAGGTGCTTGGGCTTCAGCTTAATTTGGTTGTAGGCCTTCGGAACAGAATGTTTGC  
TCCGCTGCCACCGTCAACAAGGACCTTACTGACGTCGTGGTTGGCCACCGTGGCGATGATCACC  
AACGGATCCTCGTGAGGGAACATAATCCCCCGGCAGTCGGCGGCTGTGAACGTCATGTTCCGGCA  
CCGGCGACTGGGGAGATTGAATGTCAGCGTTGTTACCTGGTGAGTCAAAGCTCTAAGGTGACG  
CTTGTGCTCCCTCCGAGAGTATATTCTCCCGAGATAACATTGATCGGAGGGAATTTCCCTCCGG  
TTTTTTACTGTTTTTCCGGGGGAAATCAAGGTCTGCCGAGAGTCCTTTGCTAACCTCTCGGATTC  
TTTTTCTCGCGGTGATCCGCGATGTATTTTTTCAAGTATCCCTTCCGGACCATGTCTTCTATCTGGT

CCTTCAGCTGGATACACTCCTCAGTGTTGTGGCCCGAAGACTCGTGGAAGTCACACCACTGATTT  
TTATTTTTTTTGCTGATACCACTCTGGGAGTGGTCTCGGCTTTCGGTAACTCTGCTCCTCCTTCGTCA  
CACTGTAAATTTTGGCGCGTGGAAGAGAGAGCGGAGTGTAGGACTCGTATCTGCCTGTGTATGA  
GGCAAACCTGTCTTCTTTGGGTCGCTGGCCGGAGATGGCTCCGGAGCCTTTGATTTTCCCTTTGC  
CTTATGGCCTTGGCCTTCAGACAAGGGTATTTGCCTCTGTTTCCCTCCCCCGATTGAGGTTGGGT  
TTTTGCTTTATTCATTCTTCGGCTCGGATGAACCTATCCGAAGCACTAAGAGCTTCCTCCAAGGT  
CTGCGGGGTATGCATGACCATGAAGTCTAGGAATTTTCCTGGCTGAAGGCCATTCTGCATTGCAA  
AAACAGCTAGCCCCTGGTCCAGCTGAGAGACGCTTGATGACTCGTTACTGAAACGGGTCAAGTA  
GTCTCGGAGGCTTTCGGTTTCCCCCTGTTGCAGACCCATGAGCTCTGCGGTAGTCTTTTCTCGGCG  
GTTTGCCGTGGAAAACCTTGCTCCTGAACCTTGAGGACAGATCATCCCAACCTGTTATGGAGCCTT  
GCCTTACTCCCTTGAGATCCACGCTTGCGCGACCCCCCTTGAGAGTGGTTGGGAAATATTTGCAC  
CAAGTTGCCTCGGATCTGGGGCAAAGATGCATATGAGCCTCATAAGAGGCCACGTGGTCCTTCG  
GATCCGTGGTCCCGTCATATGTGATATGCGACGGTATTTTAACCGTGGGTACGCGCTCTTCTAGTA  
TCCATTGCTCGAATGGTGAACCTAGCGGGAAGCATAATGGCCTTGCCCTGTTCTCGGCCGAAGGA  
ACCGCGCTCCGCCCTCTCAGAGAGGTAGGAGTGGTTTTTCGTCCCTGGCTGGGAAGTCTGGGCCT  
CGGCTGCAGGGAACGTGAGGCGACTACGCACGCTCGGTTCTTGCCGCGCGAGTCGGTCAAGGA  
CGCTTCTGCGAGCAGTCTCAGGTTCCCGGCGAGTAGATTCTGGCCGAGAAGCTGAGCTGCTGCT  
CTTATGCGCTGCTGGTCTTGAGGATGAGGATCCTTTAAATAATTGAGAGTTCTTCTCCTCTGTTTT  
TCATTTTTCCAAGAATCCTCCTCCCACTCTTCCAGTTCCCGGAAGGAAGGAAGCTTCCCACCGTC  
ATGGTCTAACTTCCTCCGCTGATGCCGGGTATGCGGAGGAGTTCGATCACGAGGCGGTGGCATAT  
TCTGTGCCCTCATTGCCTCCATGAGTACTGCCAGCGCTCTTGCCACCTCTTCCGAACCTGGGCCCC  
GTCAAAGGGGTCTCCGGCCGAGTGTGGGCATGAGGCCGTGCAGCCGATGGTTGGCTTCGGGAC  
ACTGAATATGTCCTATGATCAGACTGACCCCTGCTAGACCGAGAGTGGTCCGGCCTATATTGAGA  
GTCATGCATTATAGGAGATAGGGAATCCTCCTTGTTGTGATCCTCCCCCGAGCCGGCACCCCTTGG  
GAGAGTTCCGGTCCGGCGAGGGCGATGGTGTAGGGGTTTTAGGCTTTTCGCCCCTCCTTGACGG  
AGGCTTTTGCTCTTGCGGTTCTTAGCCATGGCTGCTAAGACAATTGCAAGATGATCTTGGTTAGGA  
ATTTGGCTTAAAGATTTTTGAAAGTCTTCCCCACAGACGGCGCCAAATTGTTTCGGTTGAAAACA  
ATGGGACCTTGCCGAAGGTCCACTAAAATGGAGAAGACTGGATTTCGATCCAAGCTGTGTTGGGC  
CGAAGGTTTCCTGCACAGTGAACACACGTAAACTAGCCTCGGGGGTGTTCGAGGAAGGCCC  
CTCCGATGCTAAAGTCAGTACAATGTGTAAGGAAGACACTATGCAAGAGAGTTTGTAGCTT  
GAGGCTTTTGTTGGAGTATTTCTCAATGCAAGAATGAGCATATGAGTTGGAATAATCCGTGTATGA  
GATAATGTATGTGATGATGCATGTGTTGTTGTGTCTCGTATGTGATGTTATGAGATGTCTTATGTAA  
GAATATGACTCTCTCCTTGAATGTGTTAATATGAGGGCTTTTATACCTCATCATTTTGGAGAGGTT  
GGGCTTTAGCCCAATTGGCTTACTTTGTGGGCTGACTTTTGACTTTTGAGCAATTGGAGAGTTGAA  
CCTTGACCTTGGGCTTTTAATTGGATCATTTAGTGCTCAGGCCCAATTTTACTAAATTGGACCCA  
AACAAAACCTTAATAATTTACATGTGTATTTGTATTATAGAGAAGAAATCAGGAGGTTGAAGGC  
TAGGAATCCTAACATGACTCATAAGGAAGCCTTAGCACTGCTGCTAAAAATGTAAGCTTAAATT  
TGTCACCTTTTTTATTGGATTAAATGATAAACGTACAAATTAAATTTTAAATGTCTATAGTACTT  
TTATTTGATTTTTTTTTCTTTGTTAATAATTTGCAGTGGGCTCATTTCCCGTCGGTCCAACATGAA  
GTTGATGAAGATAATGATAGCTATGAGAACAGCATGACACAAAACCTTAGACGACGAAGATGAA  
GCAAATTGA

>CqYAB5

ATGAACACCAACACGATGGAAGACAAAGTGGGCTCGGAGTTGGCTCCACCACCTCCGGAACAT

CTTTGCTATGTTCCGGTGCAACTTTTGCAACACTGTCCTCGCGGTATATATATATATATATGACCAGA  
GGCGGGGCTATAAATGCTAACACTGAAAGTGGCCCGGTGCAATTTTGTGAATTATGACCTAAAA  
TCAATTTTTTAAGGAAAAGTATGTTACTAAATTA AAAAGTCGGGCCCTTTTATAGTAGTTTCACTT  
AGGGGCCCTGTGCGGTGACCACCCTGCACATGCTCAGAACCACCCCTGTATATGACTAACCT  
CACCATTCATATTTTCTACGTCGTTTCATTAGCTTAGTATTTAATTA ACTACCTAGCTACTTAATGA  
TTATTATCATGTATGAAAAGAATATGTATGTTTTAAACGAGTCAAAGACTTTCTCATGTTATTAGTT  
AGACAATAGTACCATATATAATTGATGCTTACTTTGTGCGACATGAATTTTATCATTGACTGTAC  
AAGTAACGTGACA ACTAAAGTTGGACGGAAGATGCTTTGTTACATATACATTATTTAACTAAAGT  
GTTATTATAATTTTCGAGTGTAGGTTGTGATTCCATGCAAGAGGTTGTTGGACACGATAACAGTGA  
AATGTGGGCATTGTAGTAATGTATCTTTTCTGAGCACTAGGCCTCCTCTCCAAGGGCAATGTCTTG  
ACCACCAAATCACCCTTCAGGTAATAATTTTTTTTTTTTTTTTTTTTACCCTTAATGTTAATCAATCTA  
TCTAGATAATTACTTTGTAGTTCAGTTATAATTTATATATCTTTGTTTCATGATTTATGAAAATTGACA  
TACAACTTTGATTTGTAACTAATTA ACTCCAAGTTGAAATTAATTGCACAATTAGCCTAAGA  
TGCATGCATCATGCATGTATAAATATTGTTATATTGATGGAAATAAAATTATTGTACGTGTTGTTCCG  
TTGTTTGTGCTAGGGGTTCAATTTCTTGGAGAAACCAGGGGGTTTTTGCAGCACCATTGATCATC  
ACAGCAACAAGAAAAGTGAACCATCTCCTTCGTCGTCATCCACCTTAACCGAGCCTGTTTCTCC  
AAGGCCATTTGTTTGTAAACGTATGTTTTATTTCCTAATCTATTTACATTTATTTATTCAACTTTTTA  
TATAGCCTAATTGTGTGTTTTATATAGCTTATTTGTGCGTTAAGGGTACTTGGTATGTTTTAGCTTG  
GCCACACAGTGTGGTCAGTCGCACACAAAAGTTACTTGCTTAGAAATTGATTCTTTTAGTTTTTAC  
TAGAATGAAAATTATCTTTAAGATTTTATAAGCTCTTTTGATCATTAGCCAGAAGATTTTGTTTAGA  
TCTACGTCTTTTATACTAATTGAAATTATTACTTTTAATTTGTCAATGAATGAGTTTATATTATTATCT  
AATTAAGTTATTATAGCGTGATAACTGATTTATGGAATTGAATTTTATTATTGCAGCTCCTGAGA  
AGAAGCATAGGCTTCCATCCGCTTATAATAGATTCATGAAGTAAGCATCAAAATTGTACACTAAA  
ACTTCATTATCTGTAATAATTCATAATTCGTTTCATGCATATCCGGAATTAATGTCATATTGAGGTC  
GAGATTTGATCTAGTAATGTGACAAATAAACCACGTA CTCTCTGATTTGTTAGGGAGGAGATTC  
AGCGCATCAAAGCAGCAAATCCTGAGATACCTCATAGAGAGGCTTTTAGCACAGCCGCAAAGA  
ACGTAAGTTAACTACTTTTCCATCTCTTTTAACATTTTTTAGGATGTTTTTGAATAATCTCATCCCAA  
ATCCTTGAATCCAATTA AACATTTTTAAGATGTCAAAAAAAAAAAAAACATATATATATATATA  
TATATATATATATATATATATATATATATATAGGACTATCTATCTAAGGGATTAAATACGACTTTTAACTA  
CTGATTTTCTCCATTTCTTTGCTAAAATTAGATGATTATGAATTTCTTTAAGAAGTTCTTGTACGATA  
CTAGATAAGAATTTCTATTTGCATGCTATAGACTATAGCATATAATTTAGCATTATTGTTATTATCAT  
ACAAAGTTTATTTTAAACTAGCTAGCAAGTAGCAAAGATTGTTATTCTGTACTTTTAATGTTCTT  
AATTATATCAAACTAGATGAAGCCCGTGCGATGCACGGTTTGTTTGATTTTTTTTTTTTTTTTTTT  
TTTTTTTTTTTTTTTTTTTTGTATTTATGAGCCTTCAATTTGTTATATATTTAGATAAAATTCCTAATATT  
AAAAGATAATATATAATATTTAATTAATTTAACTTAAAAATCTCATTGCGCAATTTTGCTTACATG  
ACATTTGAATTATTTAATTCTAAAAGAAATTAATAATCTCCTATTTAATTGGCTACTACTAAGATTT  
ATAATCTAACATGGCGCACTAAGAAA ACTAGATCCTGTGGCTCTCTAAAACTCGGGAAAAAAC  
TCCCTTTTATATATATATATATATATATATATTAGATTATTATTTTAAAGAATTTATCCACTCTTTTATA  
TACTATATACTATGTACTGAGTACTAATTCAAAGTGTGAAGATTACTACGTAATGGATAGGTTTATG  
AGTTTATAGAATTTATTTAATAAGACGGTCAAATTGTTTATGGAAGAAGCGTTTATTTGTTGTTTC  
TTGAACAATAACATGATAAATAAAAAAAAAAATACCACCTCCATTACATATTATGTGCAACTTTG  
AAATATTTTATATCTCACAATAATACCTAAAAGTTGCATATAATTTGTAACAGAGGTAGTACTGT  
AGTAGTACAATAATTACTTCGTAATTGTTTGTATGTGATAATGTT CAGTGGGCAAGGTTTCTTC  
CGCACACTCCAGCTGGGTCACTTGCGGAGAGCAGCAACCCCAATTAA

>CqYAB6

ATGGAGTTCAGTACATCAGCAGAGCGAGTCTGCTATGTCCACTGCACCTTCTGCAAGACCATTTT  
AGCGGTACTCTATTCTCTCTCTCTCTCTTTATTTTTTTAATTTTATTTTATTTAAGGAAATAAATTACCT  
ATATATTTATTCTTTATCTTTGAGTCAGATCAAAAGTTCAAAGCCATTAATGATTTTTTTTTCTGA  
TCGAGTTTAGGTTTTGATAAACAAATTAATAATTTGTTTTGATTAAAAAATTATGCCGTATATAACA  
AAAAGAAACGGAGGAAGTATAATCTACTTTTAATTTTTCGAATTATGAGTTATTAAGCAGCCTTG  
TATAAAAGTAGGGCTGCACAGTTTAATTAATGAAGTATATATAAATTAGGGTTCATCTTCAGTGAA  
ACAGGTAGCTAGTCTAGCTAAAAATTTATTATTAATTATACTTTGTACAATTTTCAGAGTATGTTTA  
ATCCAATGAAATTCATATGTACTTCAACATTATTACTGAGTATGATATCGCTTCAGAACTTAATC  
GATTTATATAAAATCTAGTACAACAAATAAAACACTTTTTTTAACAATTTTTTTTTGGGTTTGGTA  
TGATGATCACATCTGAGTGACTTATGATTCTTCATCTGTACCAAAGTATTGCATTGGTACAGTCTCT  
TTTTACTTGGCCTGTAAAAAATTGAGTCACTTTTTTTTAAGGAAAAAAAAAAAAAAAAAATCCCT  
ACTTTGCTCAAGTTAATAACAAAAATTTTTAATCTTCTATGATTTATTTCTTTGTATTAGGAGTATA  
ATACAATATTAGTTAGTTTTTCTTTCTTTATATTAGAGGTCATACAAAATTTATTACTTCATAAAAGA  
ATGATGCTTCGTATTTTCATATGATCTGGACCGATCTTATAAGTTAAATGAGTGAGATCATTTTCAA  
TTAACTTTTTTTTTTCCCTCTTGACTTTTATGTTGGGGAGAGAAAGGGGGTTGTCAGGGTTTATGA  
ACCCAAGCCAGAAGTTGCAGCAAAAATAGAAAGAGATTTCTCATTTAGGGTTGCTTTTTTCATAT  
TGTGTACCACACCTCATGTAACCTTTATACTCTACGGAGTATATTCTTTTGATCGCGTTGTTATTTGTT  
AACTACTCGTAAATCTTTTATTCTTAATACAAACATAGACAATCTAATACCAAAAATTCGGTTATC  
ACTCTGTTTCATACTATTAATTTTTGAGAGTACCAATCAAATTATTTTTCAAACCTAATCTAAGTTA  
TGAATTTAATTCATCAGTGAAGTGATTTTAGCCTATTGATGTGTGGTGTGAGTGATAAATCGAAT  
CTGAGTCCTTGTTAATATCGATCTGTAGGGCTTTTATATATGAAATGTCAAATGTTCAAGATCTTC  
TTCCACATGGGGTTAGGATTGGTTTTTGGTGGTACTATTATTGATTTTCTACTCCTTAGTGCAAGGG  
TATTAAATTTGAATTAAGTTAAAGGTTTCATAAACATAAAATTATACTTTATTAAGTTCAAGTGTG  
AATATAAATCAATTCTCCTAATTGCTTTTTTCCCTTTATAATTTGGTCCAATCTGTCTAGCTAGGTTT  
AACTTAATAATTCCTCAACAAATCTAGAGCATGAGATAGACCAGCACGTTGATAATGTAATTA  
CTAATAACATGACAATAATTCTAGATGGACATATATAGTAGTTACGATAATTTTCAATTCATATAC  
TTCTCCGTTTTTTTTTATCGCATCACTTTCTACTTTAGGAAGTTTACTTATTATTGCATCATTTCCCT  
TTTAGAATAAAAAATATCTATGTTACACTGCAATACCCAACATACCCTTACTTTTTTCACACTTA  
CTTATTATTTTATCTTACATTACATGGACAATTTTGATTTTTTACGTTTCTCTCTCTTACTTTTTTCCAC  
TACCAAATTTGCCTCCAAAACCCTATGATGCAATAAAAAAAAACGGAGGAAGTATATTATCATA  
TGATTTACATGATTCCTTAGGATTTTGCTGATTAGCTATTAATATATGGCAGGTAAGTGTACCATGC  
TGCAGCATGTATAACATGGTAACAGTCAGATGTGGGCATTGTGCCAATCTTCTCTCTGTAAACATT  
GGACTTTCACCTCCATCTATGCCTCATCAAGATAATTTCCAGGTATAATTAACAATTGATTTTGTTT  
TCTTTCTTTCTTTACAAATAATTGAAGAAGATATTAAGAAAATCTATATATTACTATACGTATGTATA  
TATAGTTGCTGAGGCAGCACTGTAATTATCAAGATGTGAGCAAGGATAGTAGTACTATAACA  
GGTGGCTCATCTTCTTCAACTATTACAACAATGGCTTCTGATGATCATGATGTTCAACAGACTCGT  
CCCCACCCATTCGTCTGAAGTACTTAATTTTTTCAGCTAACCTTAATTCGAATTATATATGAAATG  
TTTAGATTTTCTGGTTTGTTAGTTGTTACTCTTCGTAGCGAATCATATATAGTAAGGTCTCTTTTCGT  
TTTTGAGAATTTAAAGTCGTATAATGAATTTAAAATTATAGATACGTTTATATATGTATGTATGTTAC  
GGAGTAATATAAAACCTGACAACCGAACTTCAATAGATCTTAATGACAACAAACAAGCCCTAAT  
ACATAGGATTTTATGTTCAATTATCATGCTCTCTATAAATCTTTTCCGGATTATGTAGTTTTGTAGA  
ACCTTAGTTTCTGATAGAGTATAAAACATATCCCGAGTCTCAACCATCAGCTTAAACTTTTGTT

GAGTTGGTCCTATAACAGTTTCCTTAAGACTTTATCTAGGTTAATAAGCACATTCAATTTGAAGAA  
GACTAGCAGCAAAGATTAATAGTTCAAAAGTTCAATATAATATTAAGAAGCATTGTGTTTACTCC  
TCAAAATTAAAGTCACTTCTTATATTGTTTAGACGACTAACTAAGTTGTAAATTCTATTAGACAA  
TGGATTAAAGAGGTGAGCCATTAGACAATGATATATAGTAAAGAGTAGATGATGATTACTACTTTT  
AGTCGCGTTTTTATTATGTTTTGATTTTCATGAAATTAACCTAATGAAGACTTGAACATCTAACTTAA  
TTACATGTTCAACTTAAACATAGAAGCATTACTTCGATTTGATCTTATCACAAAACCAAATTCAAA  
TGGTAACGCACAGCATTACATGCATACACACACACAATAGCTTTAACCATGTTATTTGTTGCTT  
TCTAAGGCATTTAAGGTAAACTCTAATTGTCTTATATGTGTATTTGGTGAGCAGCCCCAGAAAAG  
AGGCAACGCGTTCCTTCGGCTTATAATAAATTTATCAAGTAAGGATTACTTAATCTCCATTGCAAG  
TTCTAGTTTATTATGGTTATGAACATAGCTACAGTTAGATATGAAATGAACAATATTTTTTTCAGAA  
TAGAGAAACTTGTAGTTATAATTGTTTGATTTTTTTCATGCTCGTTCTGAATTAAGCCATATATATCT  
TGTTAAGAATGAAGCATTGCTTTTGATTAAATACGTACTACTAATATGCTTTTGTAGAATTGTTCT  
TAAACTGGGAATCTCACCCCCAATTTGGTTTTTCTTTTTTATTCTTTTCCCTTCTTAATTTGGTTC  
TCTATTGAAGGGAGGAAATCCAAAGGATAAAAGCCAGCAATCCTGAAATTAGCCATAGAGAGG  
CCTTTAGTGCAGCAGCTAAGAATGTGAGTCTTTTTATGCTCCAATATTAATTTACATGTTATGCCAC  
CTCATCTGATATGATTCCATCTAATCCGATCTAATCGTGTGTATCATATACGTATATATAGTGCAAAT  
GATTATTTTATAAAATTCGTTGATTTTACTGCCTGCATGTCTATTACACAATTATACACCCGTGTGTA  
CGTACACTGATGCTCATGTAGTTTACTAAGTACGAGTAAACCTCTTTTTTTTTTTGTTTTTTTTT  
TTTAAATAATGGTACCACGTACGAGTAAACTGTAGAAGCTAATAGTAAACAAAATGTATGTTGGC  
TTGGCACGCAGTGGGCACATTTTCCTCATATTCATTTGGCCTAAATCTGGATGGGCAAAGGCAA  
GAAAGGTTGGACCAACCAGTTTCTGGAGAAGGAACAAACAAGTCTGATGGATTTTACTGA

>CqYAB7

ATGTCGTCCTCTTCCTCGTCAACTACGACAGGAAGTGGTGGTGGTTGCGGCGGAGGTGGTAGTTT  
AGATAATAACTACCATCATCAAACCTCCTAATTATAATAACAATGATAATGTAGAACATGTTATTTT  
GCCGTCGGACCAACTTTGTTATGTTTCAGTGCAATTGCTGTGATACTGTTCTTGCTGTAAGTATATAT  
TATTCTAATTCTTATTATTGTATAATTTTATCTATCAACTTGTAATAAAAAAATGATGTGGTGTAGGT  
GAGTGTGCCGAGTAGCAGCTTGTTTAAAGACGGTGACGGTGAGATGTGGACACTGTACTAGCTTG  
TTGTCTGTCCATATGAGGGCTCATCTTTGCTGCGGTGCCTTCGCCTTCGCCTCCATCTCCGCTTC  
CTCCGCCCTCCGCCTCTTCGCCGAATCACCATCATCTTCTCCTCCCTCTTTCTTTACCTCTCCTCA  
CAGTCTTCTGGTATGTTTTTTAATTTTAGGGTTCTTCTTTGGTTAAAAGGAGACTACAAAATTTAA  
CATAATATTGTACCTCTTTGGTTAGGATAAAGAAGGCCTTCATACTAGAGAACTTTGGACGAACA  
ATGTGATAATTAAATCTAGACGGATGTTGTATAGGTTACCCGATGTTGTATCTCTCTTTGAAACTAA  
GAGTGTGAACATAATAATGTGACAACATAATTCCGATAAAAGTAGGCAAACCTCTAATTGTTAATA  
CTTTATGTGGGTGGTGTATGGGTTTTTGGGGAAGGAGTTGTAATAAGTAGTTGAATTGGTAACAAA  
AGATGTGAATTGTAACCTAAAATCAATCAACGATTCTCTTATCTTCTGCTCTTCTTCTGCATCATT  
AATTGTGCTCGAAATTAAGGCTATTAGTAGACAGTATAATTAATGTTTATGTGTTTGTGTAATGTG  
TGTGTACTAGGAGGAGATTTCGGAGCTCAGCACCAATATACTTATCAACAATCATCATCATCAGC  
CTATGTTCAATGACCCAATGATGTCCGTTTCGAGGAGTTGATCATCTTCATCACCACCATCAAGAG  
ATCCCTAAACCCCCACCCGTCAATCGCCGTAAAGTCCCTTTTCATTCCCTTCTTCGTAAAGCAGGCT  
TATGGGTAGTGTTGTAAGGTATAATAATTAATAAAGAGTGCTCGAATCGACCATTATATAAAACC  
CATCCTATATTCTATATAATCTAACTAGTTTTTGTCTTAACTAACCCTGATTATTCTTCCAATTTTT  
GTATTTACATAACAACGAACAATAATATCAAATCCGTAATCCCGATGAAATATTTGTATTTTCTAGT  
AACACTTAAAAAAGACAACATTTTATTCTGCGGTTGTGCTTTTAGCCCTAAATAGACATGTCAAC



AGATTTTGGTTCACCTTTACTTACAAAATTTGAGAAAAGAAGTGTAACAAATAAAAGTGTGTGTT  
TCTTTTCTCTTCATTCATCATTCACTTTCAACTCACTCTTGTACTTGAACCTTTTTCAATTGG  
ACTTTAATTTGTATCATACACGTTTCTCTGCACTCAAATTCCTCTATATTACAAGTACTTGTTAA  
CTTATGTACTTTTTAACACTCTTAAATAATCAAACTAACTACGGAGTAACTTATAGTATATTGTTT  
TGTACATACTCCGTAATCATCTTTCTCTAGCCTTCTCAATATTGTGGAGGAAATATTAACCTCAAAC  
ACGTAACATTCGAAAAGACCTACCTAGTAATATCGTCATCTCAATTTCTTTTTAGTTGATAAGATT  
CGTGTTAAGGTGTAATTATGTTTCAACCTAAATATAATATTCTTGGAGTAAATTCTAGCCAAATT  
GAGCTACTTGCCATCACTTAGAAGAAAAAATAAATATAATTTCTTATTAGTAATTAGTTATTACG  
AGTACCTTATAAAGTACAGTAGAATGATAGACTAGTGAAATTTTGATTGATTTAGGAGTAAACCG  
AGTAAAAAAGGAGAAAGGCAATTATAAAGTGATGATTATTATTTCTAAGTTAGGTTGGCCAAGTG  
TATGTCCCCACAACCCCTTGAGCAGGGACATATAAATCCAAGAAGAAGCGGTTGATGATGGG  
ATAGATTTGATAGATACAATGCTAACAGAATGCTATGATGAGGTTATGATTTAGAATTGATAGAGA  
AAGGGATTGGAATGAATGAATTAATGCAAAATTTATTTTTTTTAAAAATGAAAATGAAATTAATTT  
AAGTTGTCAGAAGAAAATAGTGAGTTTAGTTAATGTGGTTTTGTTTGTCTTGTGTTTATATGTTT  
GTTTTTTTTTTTTTTTTTTTTTTTTTTTTTGCATGTTTATACAATGAACAGCTCCAGAGAAGAGACAGA  
GGTACCATCTGCCTACAACAGATTTATCAAGTTAGTACCCTTTTTGTCTGACCTTATTTATTTCTT  
AAATTTGATTATTGTTAGTACTTTATGTCCAATTTGCAAATTGTAGATGAAATTAATTTAATGATC  
ATGTGTCCGTCTAAAATATATAGTCACGTTACTATTTTAATCAAACTAGTTAAGTTAATAAAAAAGTT  
TATTAACATAACTTTATCAGGGTAAAAGAATAATTAACGCTAATTACTAATGAAAAGACATGCAA  
TTGTTTTATAGGGACGAAATTCAACGAATCAAAGCCGGAATCCTGATATTAGCCACAGGGAGG  
CCTTCAGTGCAGCTGCCAAGAATGTAATAAAATCTTTGAAGTTTCTATGCTTGTGTTTTAACTT  
TTAAATGACTAATTTTAGAATTTGAGTACTTTTCAAAAATTGCTCAAACATTATTGATTTTCTATTT  
GTTTTGCGTGTAaaaaaAGTGGGCCCACTTCCACACATTCATTCGGCCTTATGCCTGACCATCA  
ACCCGTGAAGAAGGCTAACGTGCGCCAGCAGCAGGTACTACTCCCTCTATGTAGCCCTAACCT  
AGCAAATTGTACTACTTTTTTTTCTTCAAATAAATAATTTGTTCTAAAAAGAAAAAGAATTTC  
ATTTGCATAAACATTAACAAATGTTTCATCTTCTAAGACGTTTGTTAAACAAACAATTCGCCAATTT  
TAATTACTCAGTATATGTGCTATAAACTCTTTATGTCCAAAATTAAGTCATGTTATATATCGTGAATT  
TGATTGGAATGCAGGAAGGAGAGCAGATCAAGTTATGATGAAAGAAGGGTTCTTAGCTCCTCA  
AGCCAATGTGAATGTGGGTGTAGGTCCGTACTAA

>CqYAB8

ATGTCAAGCTCTAACACTGCTGCCTCTTCAACAACAACAAGCTTGTCATTGGACCACTTCTCACC  
TTCTGAGCAACTCTGTTATCTCCAATGCAGTCGCTGTGAAACCGTCCTAGCGGTATTCTTTCTCGC  
TCTTTTCATCATCTCCTTCTCACTACCACTTTATTATTTATTCACTCAATTTCTTCGTCACCTCAATAT  
CTACATACTTGATATGATTATACACGGCTTGTTGCTAGCGTTCACGGTCCGGTTCAATACTGGGTT  
GTTGTTACACGACTTGTAAGTGTGCTCAGGGTTTATATACATACTGGGTTGTTATTGTTGTAACCATC  
CCTAATCTAGTTTCTACTTCTATGAATTTATTTTAGGGTTTAAATTTATTATTTTTTTGGGACAGGTAA  
GTGTGCCATCAAGCAGCTTGTAAGGACGGTGACGGTCCGCTGTGGGCACTGCACCCATCTCCT  
GCCGGCGAACACACGATCTTTACTACTTCAGCCACCGCCGGCTAGTCAGTATCACTTGCCTCATC  
ATCATAACTACTACTCTCCCAACTCCCATATCGTCTGGTATTACTACTATCTCTATGATATCAAATT  
TATTAGCTAGGGTTTCTATTTAGGAATTCAGAATAAACTATCCTGATTGAAGGTATCATCTTGAT  
GCAAGTTAAATGCTCATTTTAGAGCATAATAAAGATTCTAATTCTGTATTGATTATAATTTTATTA  
TTTTTTTTCCATTAAATTAGACCTTGTTAATGAATCATTTTCATTTATAGGGGGAGATGCCAAATCAA  
GCACCAAATTTCTCACTAACACAACCAATGGTGCATCTAGCTACATGAATCCATCATCAAGCAG

AGGCGGTCCAAACGAGCTTCCGAGGGCTCCTACCACTAACAGACGTAAGTGAGCATATTATAAT  
TCATCCCAAGTTGTAGTACTCCATGTTAATTAAGTTTTATTATTACTAATTTTAATGGGTTTATAGTT  
TAAGGAAGAGAAAAGGGGGGTGGGGATGGATGTTCTTTTAATGCCTATATATGTCAACTTTATGC  
AGCAACTTTGTCAATTGATTCAAGTGTGTTTTCAGCACTGGATCAAGACTTTCTTACTCTCTACTTTG  
GCATAGCTAGCTATAGGTGCCTATTAATCAATTTATTGAAATTTAAAGCAACAACGAACTAGTCTA  
CTTTGGTCAATTTGATTTCTATGCATATAAGCTACATCAAATCAATTTTTTTGCCATTAAGTACATA  
ACTTACATCCGCGGTTGCGGTCATATTTTAATAATTTTTTTTTTTTTTTATATAAATGCCACGAAA  
TATATACTAGTAGTCGCTGATAGGCAATACATACGAGTCACAATTTTTTTTGAAAAGAGTATTGAAT  
TTTTGCGAAAATTCAAAAGAAATCGCTTATTTTCTCTTAAATTGTAAGTCTGTAGTGAAATGCGTGA  
AAAGTCTAGGCAAGGTGTTGATGTCTAATCTATTTTGTGTTACATAGATGAACTGTCTTTTTTTCAA  
AATCGGAACTCTTAATTGATTGCTTCAATAAATGAATTGGTTAAGGCACATGTAAATTATTTGTTT  
GTTTCATATTGATCGGATCAAATGAAGAAGACATATGAAAGAACAATAAACATGGATGTTTTTTA  
GAGATAGAGGGGTTTGTTGAGGTTCAACAATGAGTTAACAATGGACTTTACTGTAATTAAC  
CATGGACAGTGCAGGTTATAAAGATAATACTGTTTTTGTCTTTATATGTCGATTAGTGAGTGAATG  
AAAGAGATATTACTATCATTGTCATCCGGAAGTTTAGGGGAAAGTAATAATCATTACTTGTACAG  
TTGTATGTGTCTATATAATCATCATCATTGCATAAAATTAAATAAAAAAGTTTGTGTAGTGTTA  
TTTTTTAGGAAATTTATAGGAATATTGTAAAATTAAATTTTCTTGTGGTGTAATACGGATTATATTG  
AAAAATTATGCATGATTTGTTACTATTATTAACAACTTTATACTCTAATCATGTTATGCATAATCTT  
TAAAAAATAATCCATATGTTTTGAACTCTAGAAATTAGCTAGTTTTTCTTTTTATTTTTTTGGT  
TAACTATCTTGTCAAATTTAAGGTGTTTCTATTATTATTCATGTGTAAACTTATTAATTGAATATAAA  
AAAAAATAAATAAAGTTTGTAATATTATTTGCTAAAATTTGCATTTGGTGTGCCGCTGTATAA  
CAGCTCCGGAATAAAGACAGAGAGTGCCTTCAGCTTACAACCGATTCATCAAGTGAGTGATCAT  
ATATATATATATATCCCTTACATTCAATTATATATATGTATGTCTACAACAACCTTAAATGAACTG  
TATGTGCAGAGAGGAAATCCAGCGTATTAAGGCTGAAAATCCTGATATTCTCATAGAGAGGCTT  
TCAGTGCTGCTGCCAAGAATGTAAGTTTACTTATTATATTCACCTCTAATCATAGGAGTGGAGCAT  
TATATTCATTTTTGCTGTAATTAGTGATCCCTAGTTTGATAGATCTTTAATTTTTTATGGTTATCTCAT  
GCATGCGCTGATGCATGTTGTATACAAGTCATTCTGAGTCACCGGGACGATTTTGCTAATCTTACG  
GGATCCTAATTCCTAACAATTTTAATAGAGCTCTATAACGAACTAATAACAACCCCTCCTTAGCT  
TCGCTAAATAGTAATTAAGAATAAATGATGTAAATGAGATTTGATAACAAATCTTGATGCCAAC  
CTGTGACTTAAATTTATGAATAAAAAATGCCGATTACAACCGTCTACTTAATTCTATTATTATGTT  
CCTATGTCAAATGTTAGGGTTTCATGTCAATTTGCAATGTAAAAGGATATTGCAATGAAAAAAT  
ATTCTAAATATGTTTAAATCAACAGTGGGCCCACTTTCCCAACATCCAATTTGGGTTGATGCCGGA  
ACGACGGTGA

>CqYAB9

ATGATGAACACCAACATGATGGAAGACAAAGTGGGCTCGGAGTTGGCTCCACCACCTCCGGAA  
CATCTTTGCTATGTTCCGTGCAACTTTTGCAACACTGTCCTCGCGGTATATACTAACCCCTCAGTC  
CCTCACAATTCATATTTTCTACAACGTTTCTTTTAGCTTAGTAATTAACCTAGCTACTTGATTAT  
TATCTAATGTGAAAAGAATATGTATGTTTTCAACGAGTCAAAGACTTTCTCATGTTATTAGTTAGA  
CAATAGTACCATACATAATTGATGCTCACTTTGTCGGACATGAATTTTATCAAATTGTTTGTATGAG  
TAACGTGACAATAAAGTTGGACGGAGGAAGCTTCGTTACATATACCTTAACAAAAGTGTTATT  
ATCATTTTCGAGTGTAGGTTGTGATTCCGTGCAAGAGGTTGTTGGACACGATAACAGTGAAATGT  
GGGCATTGTAGTAATGTATCTTTTCTGAGCACCAGGCCTCCTCTCCAAGGGCAATGTCTTGACCA  
CCAAATTACCCTTCAGGTAAGGATTTTTTTTACCCTTAATCATTATCTCTATCTAGATCTTTACTTC

GAATTTTCGTTACAATTTACATTATCTCTGTTAATGATTTATGAAAATTGACATACACACTTTGATTT  
GTAAAATAATACGAACTACAAGTTGAAAAAATTGCACAATAAGCCTAAGATGCATGCATCATGC  
ATGTATGAATATTGTTATATTGATGGAAGTAAATATTGTACGTGTTGTATGTGCTAGGGGTTCAA  
TTTCTTGAGAAAACCAGGGGGTTTTTGAGCACCATTGATCATCACAGCAACAAGAAAAGCGAA  
CCATCTCCTTCGATGTCATCCACCTTAACCGAGCCTGTTTCTCCAAGGCCATTTGTTTGTAACGT  
ATGCTCTTTTTTTTCCCATTATATTTAGGATGCTCAACATTTTCATCGATTTCGATTTTCCCACATATAT  
ATATATATAGCCTGATTATTAAGTGAATGATATTTAGAAATTGATCCTTTTAGTTTTTACTAGCTAGG  
AAATTATCTTTAAGAAGTAGCTAGAAGAGTTTGTTTAGATCTACGTCTAATTATATTTTTAATTATT  
GCTTTTTTCAAATGAGTTTTATCTAAGTTAAAACAGTGTGATTATTGATTTATGAACTGAATTTTT  
ATTGCAGCTCCTGAGAAGAAGCATAGGCTTCCATCCGCTTATAATAGATTCATGAAGTAAGCATC  
AGAATTATTGTATACTAAAACCTTCATTATTTTTAATAATTTATAATTCGTTTCATGCATGTAGTCCTCC  
ATCCGGAATTAAAATGTCATATTTAGGTCGAGATTTGAGCTAGTAATGTGACGAGCATCTCTGGA  
CGAATAAAATGGTCGTAGTTTAAAGGAATTTAACAACCGTAATTCTTCTGATATGTTAGGGAGG  
AGATTCAGCGCATCAAAGCAGCAAATCCTGAGATACCTCATAGAGAGGCTTTTAGCACAGCCGC  
AAAGAACGTAAGTTAGCTACTTTTGGATCTTTTTAACATTTTTGAGAATGTGTTGAATAATCTTAT  
CAAATCCTTAAATCTACCTACACACTCAAATGTCAAAAAACTATTAAAAATACGTGTAATTTTTT  
TTTTTAAAAATAAATATATAATCGCATTACTAAACTAGATAAGTCCGATCCATATTTATTTTGCAA  
TATAAGTTGTACTAATGCATGGGGCATTAAAGATGTAGCTAGAGAGCTATAATTTTGTTACTAAAC  
TAGATGCTTAAGGAATATCTAAGGGATTAAATATGACTTTTACAACCTGATTTTCTCCATTTCTGAT  
CTTTGCTAAAAGTAGATGATTATGAATTTCTTTAAGAAGTACTCGTACGATACTAGATAAGAATTT  
CTATTTGCATGCTATAGCATATAAATTAGCATTATTGTTATTATCATACAAAGTATATTTTAAACTA  
GCTAGCAAGTAACAAAGATTGTTATTCCGTACTTTTAAACGTCCCTTAATAATGTATCAAACTATT  
ATTTTCGAGAAGTTTCAAAATAGAAATCACACTTCTTTTTCTGTTTTTACTATCTATATTATCCACT  
GTTTATATATACTCTGTACTAAGTACTAATTCAAAGTGTGACGATTACTACGGGATGGATCGGAGG  
GTGAAGGAACGAGAAAGGTTTATAAGTTTATAGAGTTTATTTACTTGAGACGGTCAAATTATTCA  
GGGAAGAAACGTTTATTTTGTGTTTCTTGAACGTTAACATGATAAAGAAAAAATTGTACAATAATT  
ATAAATCTTCGTATGTGATAATGTTTCAGTGGGCAAGGTTTCTTCCGCACACCCCAGCTGGGTCA  
CTTTCGGAGAGCAGCAACACCAATTAA

>CqYAB10

ATGGCAACACTTAACCGTTTATTTGATACTCAAGAACAAATATGTTACGTTCAATGCAGTTTTTGT  
ACCACCATCTTACTGGTAATCTTATGGCTCCAATGTTTTTACGTACCAATATTTTTGTATACATACAT  
TCGTAGTTAATTAAGTACTCCTCCATATATACATCCTGAACAAATGTATGGTGACGACGTTTGTTG  
ATAGTATAATTTGAAGTATTAATGTAACAACGTACATACTCATCCTGATTAATTAGGTCCGGATTAG  
TCTATATATCTGTGCTTTAATTATTATTTCCTTTTTGTGCTTTTGTACTGGGAAGGTGAGTGTGCCAT  
ATAGTAGCATGACAATGGTGGTGACAGTGAGGTGTGGTCATTGCACTGGTCTTCTCTCAGTCAAC  
ATGTTGAAAGCTTCCTTTGTTCCCCTCCATCTTTTTTCTGCCCTTAACCAAGATCAGGTAATACTAA  
TTAAGTTTACGAAATTAATTCTTCCCATATAGTTATCTAAATAGCCACATTTTAAATGTTTTTCCCTA  
TTATTTATCATTCTTATAATATAATCTACTTTGGTTTCCTTTTATCACAAATAATAATGGAAAATTGT  
CCTCACTTAAAGAAATCATAAAATGTTTCATCTTTTAAATTATTAGCAATATAATGAAATACAATACTA  
AGTAAACTCGATATTCTTGATATATTTGTTATTAAGAGACCTCAAGTACTTTTGTACACCACAAA  
ATTATGAATAATTGTAATCTAAAGTTTTTTTCGGACAATATAACCTAGCTTATTGAACTTAATTATTG  
ATTTAGAAATACATGTGTTTTTTATAAAGAAAAAGTTTACCCGTATCATGATTTAATTAATTTTGCA  
TAGGTAAATTTAAGCACCAAGAGGAGTAGATACATCAAAGGCTATGGACAGGCACAGTACTA

CTTTGTCCATGTTACCCCTCTTCGGAAGAAGATAATGACGATGAGGAAGAGGATGATGAAGATAA  
CATTGCAATTGAGCAAATTGTTAATAAACGTATACACTTCAAATTTGATGTTTCATGTATATATTATT  
GAATTTTTTTTCGCTGTAGTATCATGACCTAACGTGATTACAAATATTGTTGTTGTTTTAATTAATTGG  
CAGCTCCAGAAAAGAAAAGAAGGGCACCATCAGCTTACAACAAATTCATCAAGTATGTAAATTC  
GACGTTATTATTTATTCTTAAATTTTCATTCAAGCATCTACTTATACTATATGATATATAGAAATAAA  
TTAATTCATTAGTATATATAAATAAATAAATAAACCTTAATAATTAACATGTGTGTTTTGAATAATAG  
AGAAGAAATCAGGAGGTTGAAGGCTAGGAATCCTAATATGACTCATAAGGAAGCCTTTAGCACT  
GCTGCTAAAAACGTAAGCTTAAATTTGTCACCTTTTTTATTTGATCTATAAATTGATGATAAAGAG  
TAAAATTAAAATTTTAAATGTCTAGCTATAGTTTTATTTGATTTGTTTTTTTTTTTTTTTTTTTTGTC  
TAGCTATATTTTAAAGTGTAATAAATAAATTTTAAATGTCTAGCTATATTAATTTTTTTTGCTTTATTT  
GATTTGTTTTTTCTTTGTTAATGATTTTGAGTGGGCTCATTTCCCGTCGGTCCAACATGAAGTTGA  
TGAAGATAATGGTAGCCATGAGAACAGCATGACACAAAACCTTAGACGACGAAGATTAA

>CqYAB11

ATGTCAAGCTCTAATATTGCCGCCTCTTCAACAACAACAACAACAACAACAACAACAACAAGC  
TTGTCAATTGGACCACTTCCATCCTTCTGAACAACCTCTGTTATCTCCAATGCACTCGCTGTGAGACC  
GTCCTTGCGGTATTCTTTCTCCTCGCTCTTTTCATCATTATCATTCTCTTCTCACTACATACATACC  
ACTCTCTTATTTATTCATTCAATTCGATCGATTCTTCGTCATCTCAATATCTATACTACTTGATGTAT  
ATGATTAATACCGGGCCGAGATACTCGGTTCACTTAATTAATTGGTTTTTATTGTTGTAACATAT  
CCCTAATCTACTTCTATGTTTGTATTGTTGTAGGTATATGATTTTATTTTAGGGTTTAAATTTATGAA  
AACTAACTATTGGAAAAAAAATAAATAATGTAATAATTTGGACAGGTAAGTGTGCCATCAAGC  
AGCTTGACAAGACGGTGACGGTTCGATGTGGGCACTGCACGCATCTCCTGCCGGTGAACACAC  
GATCTCTACTACTTCAGCCGCCGCCGGCTAGTCAGTATCACTTGCCTCATCATATACTACTACT  
CTCCAAACTCCCATTATCGTCTGGTATTACTACTATCCAATTTATTAGCTAGGGTTTCTATTTTTAGC  
AATTCAGAAAGCCCACAATTTGTTTATACTAGTATGTTAATTGAATATAACCTGATTTAATTGGTGT  
AAGTTAAATGATCATATTCAAGCATAATAACAAGATTCTAATTCCTCATTGATTATTATTATTATAG  
GGGAGATGCCAAATCAAGCACCAAATTTCTACTAACACAATCAAATGGTGCATCTAGCTACA  
TGAATCCATCATCAAGCCGAGGCGGTTCAAACGAGCTTCCAAGGGCTCCTACCACTAACAGACG  
TAATTCATCTATCTCAACTCTCAAGTAGTACATACTCCATGTTAGTTAATTAATTAATTAATTGAAA  
TTTGTTTAAAGGAGGAGCTGAGAAAAGGGGGGTGGGGATATGGAGGGATGTTCTTTAATGCCTAT  
GTCAACTTTTTGCAGCAACTTTGTCATTGATTCACTGTTTGTTCAGCACTGGATCAAGACTTTCT  
TACTCTCTACTTTGGCCTAGCTATTGCTCCTTAATCAATTTTTTTTTTTTTTTTTTTTTTTTTTTA  
AATTTAAACCAACAACGAACCTTGTTTTGGTCAGTTTCTTTCTGTACATATAATTTTTTTGTACATA  
TAAATGTCACAACTACTATATACTAGCTAGTGGTCGCTGGTATGCAATATATATAAGTCACAATT  
TTTTTTTATTTAAGGAGTATTGAATTTTTCTTATGTTAAATTGTACTCGGTAGTGAAATGTGTGAA  
AAGTCTAGGCAATATACAAACGTTTAATCTATTTTTATTACATAGATGAAGTCCTTTTTTTTTCAA  
AATCGGAATTCTTAATTGATTGCTTCAATAAATGAATTGGTTAGGGCACATGTCAATTATTAATTG  
TTCATATTGATCGGATCGAATGAAGAAGACATATGAAAGAGCAAAGAAACATGGATGTTTCTTTT  
AGAGATGATAGAGGGGTTTGTGTTGAGGTTCAACAAATGGGTAAACATGGTAGAAAAGGATAA  
TACTGTAATTAATACCTTCTTTAACCAATAAACCAAGGACAGGTTATAAAGATGATATTGTTTTGT  
GTTTTTGTCTTTATATGTCGATCAGTGAGTGAATGAAAGAGATATTACTATCATTGTCTTCCGGAAG  
TTTAGGGTAAAGTATTAATCATTTACTTGTACAGTTGTTTGTGTCTATACAATCATCATTGCATAAA  
ATTAATATAAAAAAGTTAGTTTTGCAATATTCCTATAAGTTTAGGAAGTTTATACGAAAATTGAAA  
AAAAAAAATATAGATTTCTTAAAGGTGTCAATATGGAGCATATTGAAAATTATGCATGATTTGTTA

TTAATAACACTTTTATACTTTAAACATGTTATGCACTTATGCATATGACATTAAGAAAATATCCATA  
AGTTTGAACCTCTGAATTTAATTTTTATTTTTATCTTTTGGTTAACTATTTTTTCATATTTAAAGTGT  
TTCTAATTTTCTATTAGTATTCATATATAAACTTATTTAAATATTTTTTGCTAAATTTGCATTTGGTTTA  
CAACAGCACCGGAAAAAAGACAAAGAGTGCCTTCAGCTTACAACCGATTTCATCAAGTGAGCAA  
TCGTTCTCTTTCAATTTAACTCTATAATACGAGTAATTTGTTTTTCGAATAAATATGTGTATGTCTGA  
AACCTCAAAATGAATTGTACTTCATATGTGCAGAGAGGAAATCCAGCGTATTAAGGCTGAAAAT  
CCTGATATTTCTCATAGAGAGGCTTTTCAGTGCTGCTGCCAAGAATGTAAGTTTACTTATTGTACTC  
TTCACATAATCATCTATGTTGCTCTTGGCTTAGTATAACATGTTTCAAGCATTGTAATTTGTGAAAAA  
AAGTTCCCAAATTTCATAGATTTTTATGGTTATCGATTTTGCTAGCTAGTCTTATTGGATCCTAATTC  
CTATTTTTTTTATATATACAACCTCAATTATGTGATGAAATTAATACAGTACAACGAACCTCTTTTTGG  
CTTCATTTACATGCTAAATAAGTAAATAGTAATTGAAAATAAATGATGTAAATGAGATTTGACAAT  
GAATTCTCGGAACCAACCCTGTGACTTTTACTGCCAAATCAAAAATGCTGGATTATTACTAGCAT  
CTACTTAATCGTGTTAAGTTCCAAAGTCAAATGTTAGGGTTTCATGACAGTTTACTGTATGTATGA  
GTAATAAAATTTTGAAAAATGGCTGAAAAAAATATTCTAAATATGTTAAATCAAACAGTGGGCC  
CACTTTCCCCACATCCATTTTGGGTTGATGCCGGAACGACGGTGA

>CqYAB12

ATGGAGTTCAGTACATCAGCAGAGCGAGTCTGCTATGTCCACTGCACCTTCTGCAACACCATTTT  
AGCGGTACTCTTTTCTCTCTCTCCTCTTTTTTTTATTTATTTCTTTATTTAAGAAAGAAAAAATCTCC  
CACATATTCTGTATCTTTGAGTTTATTAGATCAGATTTTATTAATTTTTTTTTTCTATTTCTGATCAAG  
TTTTAGGTTTTGCTAAGCAAATTAAGTTTGTACTAATAAATATATTTTTTCCGTAGATAACAAAA  
AGAAATGGAGGGTGTATAAGCTACCTTTAACTTTCTGAAAAAAAATTATGAGTTGTTAATTAAG  
CAGCCTATGTATGTATAAAAGTAGGGTTGCAAACCTTAATTAATAAAGTATATATAAATTAGGGTT  
CATCATCAATGAAACAGGTAGCTAGTCTAGCTAATTATTAGTATAATTTAATTTGTTTAGTGTATGT  
TTAATCCAATAAAATTTTCATATGTACTTCAACATTATTATGATATTACCTTACAACTTATACTTTTT  
TTTTTTTTGAATGATGACCACATCTCACTGATCTCAGTCACTTATGATTCTTCATCTGTACCAAAGT  
GTTGCATTGGTACAGTCTCTCTTTTTTTCCTTGGCATGTAAAAAATTGAGTTTTTTTTTTTTTATTTATTT  
TTAGAAAATAAAAAATAAAATCCCTCCTTTGCTTAAGTTAATAACAAAAAATTTATTTAATGATT  
TATTACTTTGTACTAAGAGTATAATACAACATTAGTTTTTCTTTCTTGGTATACAAAAATTATTACTT  
CGTAAATGAATGATACTCCCTATTTTCATATGATCTGGATCGATTTATAACTTAAAATGAGTGAGATC  
GTTTTTACTTTAACTTTTTTTTTTTTTTTTTTCTCTCTTGACTTTTATGTTGGGGAGAAAAAGGG  
GATGTCAGGGTTTGTGAACCCAAGCCAGAACTGCAGCAAAAATGGAAAGAGATTTCTCATTTA  
GGGTTGCCTTTTTCATGTTGTGTACCACACTTCATGTAACTTTATACTCTACCAAGTATATTCTTTG  
ATCGCGTTGTTATTTCGTTAACTACTCGTAAATCTATTATTCTTAGTACAAACATAGATAACAATTAC  
GGTGACAATTCAATACGAAAAAAATCTGTTATCCACTCTGTTACACTATTAATTTTATGAGAGTA  
TCATCAATCGAATTATTTTTCGAAACCTAATCTAAGTTATGAATTTAATTCATTGGTAAAGTGATT  
TTAGCCTATTGATGTGGTGTGTGGGATTAAATCGACTCGATCCTCATTAAAGATCGATATGTAGGA  
CTTGATACTACCTCCGGATTATATTATATGCAACTTTGGAATTTTTTATATCTCACAAATAATACCC  
CAAAGTTGCATATAATACAATCCGGAGGTTGTATATGAAATGTCAAATGTTCAAGATCTTCTCCCA  
CATGGGATTAGGATTGGTTTTGGTGGTACTATTTATTTCTAGTCCTTAAAAATAACTTTTAAATCA  
ATAAAGTATTTAGTTGAAGTGTAATATAAATCAATTCTCCTTATTGCTTTTTTTTTTTTTTCCATTTG  
GTCCAATCTTAGTAGCTAGGTTTTACTTGATGATATGTTTCTCAACAAATCTAGATCATCATGAGAT  
TGACGGTAGGTCATGTTGATAATGTAATTTGAACTAATAATATGATAGCTAAATCTACGGGACTAT  
AAATTAGTATTTACGACATATTTTCATTAAATCTAATTGATTAGCTATTAACACGCGGCAGGTAAGC

GTACCATGCTGCAGCATGTATAATATGGTAACAGTCAGATGTGGGCATTGTGCCAATCTTCTCTCT  
GTTAACATTGGACTTTCACCTCCATCTATGCCTTATCAAGATAATTTCCAGGTATAATTTACTTACA  
ATTGATCTCATTTTATTATTTTATTTTTCTTTCTTTGCAATTATTTGAACAAAGTGTATGTAAAGAA  
ATTAATAATCTATATAGTTGCTGAGGCAGCACTATAATTATCAAGATGTGAGCAGAGATAGTAGT  
AGTACTATAACAGGCGGCTCATCGTCTTCAACTATTACTACAATCGCTTCTGATGATCATGATGTT  
CAACAGACTCGTCCCCCACCATTTCGTGTAAGTACTTAATTTTTTTCAGCTAATCTTAATTCAATT  
GATATATTTATACTACCTCCGTAAATGGTATGTGTAACCTTTGGGGAATTATTTGTGAGATATAAAA  
TATTCCAAAGTTGCACATAACATTTAACGGAAGTAGTATATGAAATGTTTAGATATTATGGTTTGTT  
AGTTGTTACTCTTCATAGTTGATCATAATTAGGTCCCTTTTTGTTTTTGAGGATTTAAAGTCGTATA  
ATGAACTTAAATTATAGATACATTTATATATGACTATATGTATGTTACGGAGTAATATAATAAACC  
TGAAAACCGAACTTCAATAGATCTTTAACAGCAACAAACAAGCCCTAATTCTTAGGATTTTTGTT  
CAACAAACAAGCTAGCCCTATAAAAGAAAGTGTTTTGATTTTCATGAAATTAACCTAATGAAGATT  
TGAACATCCAACCTTAATTACATATTTGTTCAAATTAACATAAAAGCATTACTTCGACTTGATCAA  
AGGGTAACGCGAAGCATTAAACACACACAAACACGCAAACACACAAGAGCTTTAACCATGTT  
ATTTGTTGGCTTGTTGCTTTCTAAGGCATTTAGGTAAACTCTAATTGTCTTATATGTTTATTGTTGAG  
CAGCCCCGAAAAGAGGCAACGCGTGCTTCGGCTTATAATAAATTTATCAAGTAAGGATTACTA  
AATCCCCATTGCAAGTTCTAGTTAATCTCTCTATTTGTCTACTTATAACATACTTATTCATCTGTTAG  
TATGAACTTATAATTGTTTGGTTTTCTCATGCTCACTCTTAAATTTTAATTAATATGTTGTTAAGC  
ATGAAGCATTTGCTTTTGAAAACATAAAAAATAAACTTTTAATACTAATTAATTTGTTACATGTTG  
AATAATACTGTAAAAATACTAATATACTAATTTGTTACCCCCAATTTTTTATTTTTTTGTTTCCCCCTT  
CTTAATAATTTGGTTCTCTATTGAAGGGAGGAAATCCAAAGGATAAAAGCCAGCAATCCTGAAAT  
TAGCCATAGAGAGGCCTTCAGTGCAGCAGCTAAGAATGTAAGTCTTTTTATGTTCTAAAAGTAAC  
TTTAATTTTATGTTATTTACCTAATCTGCTATGATCCCATCTAATCCGACTTGATTGTGTCTATCAT  
ACATACATTAAATGTATACATGATTATTACAGAGTACTTGATAAATTCGTCGATTTTACTGCATGTC  
TATTACACAATTATTATACACTCGTATGTACGTAAAATAATAATTAGTTACACCGATGCTGACGTTA  
GTAACTGTAGAAGCTAATAGTAAACATAATGTTGGCTTGGCAGTGGGCACATTTTCCTCATATTC  
ACTTTGGCCTAAATCTGGACGGGCAAAGCCAAGCAAGGTTGGACCAACCAGTTTCTGGAGAAG  
GGACAAACAAGTCTCATGGATTTTACTGA

#### Supplementary File S4

YABBY protein sequences in *C. pallidicaule* (A-genome)

>AAA12895-RA

MEFSTSAERVICYVHCTFCNTILAVSVPCCSMYNMVTVRCGHCANLLSVNIGLSPPSMPHQDNFQLLR  
QHCNYQDVSKDSSSTITGGSSSTITTMASDDHDVQQTRPPPIRPPEKRQRVPSAYNKFIEEIQRIKASN  
PEISHREAFSAAAKNWAHFPPIHFGLNLDGQRQARLDQPVSGEETNKSHGFY

>AAA11906-RA

MSTLNRLFDTQEIQICYVQCSFCTTILLVSPYSSMTMVTVRCGHCTGLLSVNMLKASFVPLHLFSALN  
QDQVNFKHLEEVDTSKAMDRHTPEKKRRAPSAYNKFIEEIRRLKARNPNMTHKEAFSTAANKWAH  
FPSVQHEVDEDNGSHENSMTQNLDDDED

>AAA01885-RA

MMNTNMMEDKVGSELAPPPPEHLCYVRCNFCNTVLAVVIPCKRLLDTITVKCGHCSNVSFLSTRPPL  
QGQCLDHQITLQGFNFPEKPGGFCSTIDHHSNKKIEPSPSMSSTLTEPVSPRPVCKPPEKKHRLPSAYN  
RFMKEEIQRIKAANPEIPHREAFSTAANKNWARFLPHTPAGSLAESSNIN

YABBY proteins sequences in *C. suecicum* (B-genome)

>BBB02023-RA

MSTSCVDQAAVAPPSEQLCYIPCNYCNIVLAVSVPCNNLFDIVTVRCGHCTNLWSVNMAAAFHSL  
ASWQQHQQQNFHQAPNNGNMGEYRIDNLGSSSKCNYTSKAATTMRISPPINNNSAEERIINRPPEKR  
QRVPSAYNQFIKEEIQRIKANNPDISHREAFSTAAKNWAHFPFIHFGLMLETNNQPKLDE

>BBB05628-RA

MRLTVGHANNVSVPCCSMYNMVTVRCGHCANLLSVNIGLSPPSMPYQDNFQLLRQHYNYQDVSRD  
SSSTITGSSSTITTIASDDHDVQQTRPPPIRPPEKRQVRVPSAYNKFIKEEIQRIKASNPEISHREAFSAAA  
KNWAHFPFIHFGLNLDGQSARLDQPVSGEGTNKSHGFY

>BBB04920-RA

MNTNTMEDKVGSELAPPPPEHLCYVRCNFCNTTVVIPCKRLLDTITVKCGHCSNVSFLSTRPPLQGQCL  
DHQITLQGFNFLEKPGGFCSTIDHHSNKKSEPSSSSTLTPEVSPRPVCKPPEKKHRLPSAYNRFMKEE  
IQRIKAANPEIPHREAFSTAAKNWARFLPHTPVAESSNTN

Supplementary File S5

YABBY-related sequences from clubmosses and *Micromonas* species

>ATG86193.1 transcription factor YABBY [*Huperzia selago*]

MSSCSGMMNSPPADEQSSCCDESLVDDRCKCHVHCGHCHVILTVDVPHNLLDKNSVLVRCGDCRS  
LISVNIQSLAENQSGLVSRVRKNHEEGGERTNDESSIISSEHFASSGKSLQSILSSPPAEAVKPPKPKRRN  
QSSRGDDSSILASRGKKPRTPSAYNMFVRDEILRIKAKDPTISHKEAFIAAAKNWATQPHINLGRSEHR  
DKKIEEKCLNRTV

>KAJ7562872.1 hypothetical protein O6H91\_03G087300 [*Diphasiastrum complanatum*]

MSSYHGMHSLPADEQSSCNDESSVDDRYIKCHVHCGHCHVILTVDVPHSLMNRSSVLVRCGDCRSL  
ISVNIQSLAEHHSSLENDGEGGQRTNEESSMVSSSDRVTSKGKLNLSMPAPVAVKPPKPKRRNHSSSS  
DDVSIAASRGKKPRTPSAYNIFVREEILRIKAKDPTISHKEAFIAAAKNWATHPHFHLGTRSEYRDKKSD  
EKDTEEVRYAESVIYKGTGCRTRVVGKSAW

>tr|C1DY70|C1DY70\_MICCC Yabby-like protein OS=*Micromonas commoda* (strain RCC299 / NOUM17 / CCMP2709) OX=296587 GN=MICPUN\_112717 PE=3 SV=1

MGPNLQAASGSNMSDAAAAEARWARCDAPTDVDAVARGDVDRARDGSKTVHVDCQRCRSRLE  
VRVPAALLAEGSATVRCGACGVHLKIAVPPALAPVHPPRPAFSAMTKPAERLPAASAPRPTQQRPAT  
GASLQLSAGALASFLDPAVCVAMGANPTDPQLRKAAEEFWRSCGDANAVDPNATYDIDLAPARP  
AKRAKKTRKPRDPSYNVFIREEIPRLKAENPAMTHKDAFKAAARNWAGSSLNMRSAAYVPDPVLA  
AAAAAAHANVLDAHANVTDAATRAAILQKLPHLLRGRVEDARAEAAAARRWEMDLTTTNGVD  
GPTGAKGVVDYAGDAFASVHEGRDEPTHRGPVRPKTSWSSYRSTHEAFEPID

>tr|C1MQU4|C1MQU4\_MICPC Yabby-like transcription factor OS=*Micromonas pusilla* (strain CCMP1545) OX=564608 GN=MICPUCDRAFT\_57415 PE=3 SV=1

MTADASADVAAAVAGLVDDDRGTLVHVDCDRCSRLEVRVPSSLRVDARGVAVRCGACETLLQVA  
VPPLLSPTPGLFARGEPGDGIGLAPPGSLLSGDRVSGGGGDDDDGGAGAGVAGCGPGRSRASNPEH  
ERHLRLARYHMDMAAQHSNPSAGHVSPAMPATSPLAQLSLPPCEHESDERVDRVLRAAAHEFWW  
NPSEIPHRGRRDDDDDDYYDANPRHQKILKREKRPRDPSYNVFIREEIPRLKEKDPGLNHRDAFKAAA

KNWAHSPLNMRSFAFVPGPTDRPAERDDDDDERRAGEVDEDDSSAAARAEIMRKLQPILQSTPTREE  
GTDTAAAAAGRGDGRANEAHSTPRRDSRDEADKTSAGERRGTSSHRTKSSEHSTECKEYTS

>XP\_002499636.1 yabby-like protein [*Micromonas commoda*]

MGPNLQAASGSNMSDAAAAEARWARCDAPTDVDAVARGDVDRARDDGSKTVHVDCQRCRSRLEV  
RVPAALLAEGSATVRCGACGVHLKIAVPPALAPVHPPRPAFSAMTKPAERLPAASAPRPTQQRPATGA  
SLQLSAGALASFLDPAVCVAMGANPTDPQLRKAAEEFWRSCDGDANAVDPNATYDIDLAPARPAKR  
AKKTRKPRDPSPVNFIREIIPRLKAENPAMTHKDAFKAAARNWAGSSLNMRSAAYVPDPVLAAAA  
AAAHANVLDAHANVTDAATRAAILQKLKPHLLRGRVEDARAEAAAARRWEMDLTTTNGVDGPTG  
AKGVVDYAGDAFASVHEGRDEPTHRGPVRPKTSWSSYRSTHEAFEPID

**Table S1.** List of YABBY genes in *Spinacia oleracea*, *Beta vulgaris*, *Arabidopsis thaliana* and *Oryza sativa*.

| Gene name | Gene ID          | Chromosome location                            | Species                     |
|-----------|------------------|------------------------------------------------|-----------------------------|
| SoYAB1    | Spov3_chr5.01174 | chr5:13785462-13789119                         | <i>Spinacia oleracea</i>    |
| SoYAB2    | Spov3_chr6.01719 | chr6:25016034-25019047                         | <i>Spinacia oleracea</i>    |
| SoYAB3    | Spov3_chr2.00033 | chr2:438633-442032                             | <i>Spinacia oleracea</i>    |
| SoYAB4    | Spov3_chr4.04704 | chr4:118332792-118334653                       | <i>Spinacia oleracea</i>    |
| SoYAB5    | Spov3_chr5.02270 | chr5:36618488-36621731                         | <i>Spinacia oleracea</i>    |
| SoYAB6    | Spov3_chr5.03629 | chr5:81326671-81327963                         | <i>Spinacia oleracea</i>    |
| BvYAB1    | EL10Ac1g00847.1  | Chr1_EL10_PGA_scaffold3:<br>10903605-10908609  | <i>Beta vulgaris</i>        |
| BvYAB2    | EL10Ac7g16274.1  | Chr7_EL10_PGA_scaffold5:<br>5624126-5632125    | <i>Beta vulgaris</i>        |
| BvYAB3    | EL10Ac5g13007.1  | Chr5_EL10_PGA_scaffold2:<br>58218134..58224183 | <i>Beta vulgaris</i>        |
| BvYAB4    | EL10Ac6g13704.1  | Chr6_EL10_PGA_scaffold0:<br>9155588-9157688    | <i>Beta vulgaris</i>        |
| BvYAB5    | EL10Ac8g18683.1  | Chr8_EL10_PGA_scaffold4:<br>5786571-5791258    | <i>Beta vulgaris</i>        |
| BvYAB6    | EL10Ac6g15025.1  | Chr6_EL10_PGA_scaffold0:<br>54569157-54572302  | <i>Beta vulgaris</i>        |
| AtFIL     | At2g45190        | Chr2:18628251-18630779                         | <i>Arabidopsis thaliana</i> |
| AtYAB2    | At1g08465        | Chr1:2675812-2679824                           | <i>Arabidopsis thaliana</i> |
| AtYAB3    | At4g00180        | Chr4:72544-75576                               | <i>Arabidopsis thaliana</i> |
| AtINO     | At1g23420        | Chr1:8317296-8319491                           | <i>Arabidopsis thaliana</i> |
| AtYAB5    | At2g26580        | Chr2:11303454-11307010                         | <i>Arabidopsis thaliana</i> |
| AtCRC     | At1g69180        | Chr1:26007349-26009141                         | <i>Arabidopsis thaliana</i> |
| OsYABBY1  | LOC_Os07g06620.1 | Chr7:3221591-3229297                           | <i>Oryza sativa</i>         |
| OsYABBY2  | LOC_Os03g44710.1 | Chr3:25197056-25206961                         | <i>Oryza sativa</i>         |
| OsYABBY3  | LOC_Os10g36420.1 | Chr10:19471067-19475406                        | <i>Oryza sativa</i>         |
| OsYABBY4  | LOC_Os02g42950.1 | Chr2:25839310-25842729                         | <i>Oryza sativa</i>         |
| OsYABBY5  | LOC_Os04g45330.1 | Chr4:26797649-26800253                         | <i>Oryza sativa</i>         |
| OsYABBY6  | LOC_Os12g42610.1 | Chr12:26477632-26487388                        | <i>Oryza sativa</i>         |



|          |                  |                        |                     |
|----------|------------------|------------------------|---------------------|
| OsYABBY7 | LOC_Os07g38410.1 | Chr7:23086433-23088524 | <i>Oryza sativa</i> |
| DL       | LOC_Os03g11600.2 | Chr3:6041244-6048687   | <i>Oryza sativa</i> |

**Table S2.** List of primers used in this study.

| Primer name | Gene           | Sequence (5'→3')                   | Purpose  |
|-------------|----------------|------------------------------------|----------|
| SX-S-01     | <i>CqYAB1</i>  | ATTAAGAAGTGTAAGTGTGTTT             | qRT-PCR  |
| SX-A-02     |                | AATAATATTACGTTCTTAACG              |          |
| SX-S-03     | <i>CqYAB2</i>  | AAACACCTAATAACAACAATA              |          |
| SX-A-04     |                | TGAAGGCGAAGGCAAAAGATG              |          |
| SX-S-05     | <i>CqYAB3</i>  | ATTAAGAAGATGAGTAACTG               |          |
| SX-A-06     |                | CAATAATATTACGTTCTTAGCA             |          |
| SX-S-07     | <i>CqYAB4</i>  | ATGAGGAGGAGGATGAAGAAG              |          |
| SX-A-08     |                | AAGGCTTCCTTATGAGTCATG              |          |
| SX-S-09     | <i>CqYAB5</i>  | AAGTGAACCATCTCCTTCGTC              |          |
| SX-A-10     |                | TCCGCAAGTGACCCAGCTGGAG             |          |
| SX-S-11     | <i>CqYAB6</i>  | TGTAATTATCAAGATGTGAGCAA            |          |
| SX-A-12     |                | AGGAACGCGTTGCCTCTTTTCT             |          |
| SX-S-13     | <i>CqYAB7</i>  | CCGCCTCTTCGCCGAATCACCA             |          |
| SX-A-14     |                | ACTCCTCGAACGACATCATT               |          |
| SX-S-15     | <i>CqYAB8</i>  | TGGACCACTTCTCACCTTCTGAG            |          |
| SX-A-16     |                | AGTAGTAAAGATCGTGTGTTCC             |          |
| SX-S-17     | <i>CqYAB9</i>  | TAATGTATCTTTCTGAGCACC              |          |
| SX-A-18     |                | TGACATCGAAGGAGATGGTTCC             |          |
| SX-S-19     | <i>CqYAB10</i> | AGAAGGGCACCATCAGCTTAC              |          |
| SX-A-20     |                | TCATGCTGTTCTCATGGCTAC              |          |
| SX-S-21     | <i>CqYAB11</i> | TGGACCACTTCCATCCTTCTGAA            |          |
| SX-A-22     |                | AGTAGTAGAGATCGTGTGTTC              |          |
| SX-S-23     | <i>CqYAB12</i> | TATAATTATCAAGATGTGAGCAG            |          |
| SX-A-24     |                | AGGCACGCGTTGCCTCTTTTCC             |          |
| LT-S-01     | <i>CqACT2</i>  | CCCCTGCTATGTATGTTGCAATTC           |          |
| LT-A-02     |                | AGTGGTCTGTTAGGTCACGACCAG           |          |
| LT-S-03     | <i>CqRAN3</i>  | TTGGTGTCGAAGTTCATCCATTGG           |          |
| LT-A-04     |                | GTAAGTCAATCGAGCAGTCACATC           |          |
| SX-S-25     | <i>INO</i>     | ACTGACGCGTTGAAGAGTAGGTTATGTCTTTTTG | promoter |
| SX-A-26     |                | TGCACCCGGGAGAGAGTGTGTGTACGATG      | CDS      |
| SX-S-27     | <i>INO</i>     | TGCACCCGGGATGAATATTAACAAAACCTATC   |          |
| SX-A-28     |                | AGTCTAGATTACTCAAATGGAGATTTTCCC     |          |
| SX-S-29     | <i>CqYAB4</i>  | TGCACCCGGGATGGCAACACTTAATCGTTTATTG |          |
| SX-A-30     |                | AGTCTAGATTTCATTTGCTTCATCTTCGTCG    |          |
| SX-S-31     | <i>CqYAB10</i> | TGCACCCGGGATGGCAACACTTAACCGTTTATTG |          |
| SX-A-32     |                | AGTCTAGATTAATCTTCGTCGTCCTAAGTTTG   |          |
